# Supplementary material
Source: HighWire-hosted journal article supplement (https://gut.bmj.com/content/68/1/25)
Supplement: inline-supplementary-material-4 [file inline-supplementary-material-4.xls]

## Sheet: up-regulated
gene symble	Gene name	baseMean	log2FoldChange	lfcSE	pvalue	padj
ENSG00000179674	ARL14	3025	1.09844	0.201926	5.33314e-08	3.56106e-05
ENSG00000188175	HEPACAM2	3373.1	1.29926	0.26301	7.81335e-07	0.000209751
ENSG00000105894	PTN	261.417	0.845128	0.179423	2.4742e-06	0.00046415
ENSG00000165078	CPA6	113.487	1.61154	0.346626	3.33193e-06	0.000561124
ENSG00000256643	LINC02441	160.262	1.39725	0.305844	4.9124e-06	0.000699118
ENSG00000112245	PTP4A1	15075.7	0.548792	0.121444	6.21645e-06	0.00080531
ENSG00000257859	CASC18	20.268	2.41493	0.550891	1.16693e-05	0.0012611
ENSG00000259279	AC037198.1	6.12027	2.90139	0.667584	1.38575e-05	0.00137954
ENSG00000080644	CHRNA3	90.7374	1.12031	0.257996	1.40967e-05	0.00139647
ENSG00000113161	HMGCR	5729.13	0.473452	0.109274	1.47289e-05	0.00143202
ENSG00000247516	MIR4458HG	264.939	0.796001	0.183659	1.46342e-05	0.00143202
ENSG00000101958	GLRA2	72.3569	1.80248	0.425863	2.31082e-05	0.00187994
ENSG00000182518	FAM104B	301.509	0.482162	0.113957	2.32563e-05	0.00187994
ENSG00000115590	IL1R2	2679.79	1.29501	0.309324	2.83169e-05	0.00211947
ENSG00000175497	DPP10	44.8758	2.32662	0.55587	2.84485e-05	0.00212146
ENSG00000259237	AC044791.1	19.9521	2.1461	0.515294	3.11609e-05	0.0022571
ENSG00000157315	TMED6	68.9076	1.2781	0.308763	3.48185e-05	0.00246031
ENSG00000101098	RIMS4	32.8727	2.56569	0.622149	3.7249e-05	0.00259574
ENSG00000156284	CLDN8	788.662	2.80537	0.683723	4.07696e-05	0.00275835
ENSG00000236404	VLDLR-AS1	31.3287	2.17319	0.535168	4.89129e-05	0.00313503
ENSG00000186281	GPAT2	115.134	0.841429	0.208737	5.55303e-05	0.00344237
ENSG00000266200	PNLIPRP2	175.872	2.35026	0.585417	5.95254e-05	0.00360164
ENSG00000162949	CAPN13	906.358	1.45016	0.364926	7.07175e-05	0.0041424
ENSG00000272189	AL024508.2	120.579	0.652746	0.164833	7.49341e-05	0.00432669
ENSG00000170382	LRRN2	305.948	1.66263	0.420389	7.6544e-05	0.00434516
ENSG00000278291	AL161772.1	241.146	0.730068	0.185979	8.65332e-05	0.00470094
ENSG00000137547	MRPL15	1608.12	0.467275	0.119378	9.06876e-05	0.00483563
ENSG00000114023	FAM162A	4443.22	0.82433	0.211255	9.53764e-05	0.00498052
ENSG00000248690	HAS2-AS1	12.3795	1.47313	0.378339	9.87374e-05	0.00511637
ENSG00000225421	AC019330.1	62.7164	1.69638	0.435945	9.97144e-05	0.00512755
ENSG00000251209	LINC00923	14.1033	1.66957	0.429952	0.000103109	0.00524871
ENSG00000118507	AKAP7	685.882	0.81083	0.209195	0.000106208	0.0053525
ENSG00000167186	COQ7	781.639	0.347753	0.0908167	0.000128576	0.00622469
ENSG00000114248	LRRC31	852.049	0.589441	0.154492	0.000135996	0.00645248
ENSG00000241635	UGT1A1	129.556	1.73341	0.454372	0.000136203	0.00645248
ENSG00000150667	FSIP1	51.3754	1.26029	0.330781	0.000138936	0.00651454
ENSG00000144057	ST6GAL2	416.172	2.39409	0.631433	0.000149732	0.0069207
ENSG00000103528	SYT17	127.718	0.965227	0.255443	0.000157686	0.00716109
ENSG00000248144	ADH1C	6128.34	1.38353	0.3675	0.000166739	0.00744972
ENSG00000006740	ARHGAP44	1853.34	0.590535	0.158025	0.000186258	0.00807742
ENSG00000127249	ATP13A4	182.323	0.988055	0.264894	0.000191481	0.00819838
ENSG00000095739	BAMBI	275.94	1.1204	0.300694	0.000194508	0.00831037
ENSG00000264575	LINC00526	219.107	0.574382	0.154905	0.00020894	0.00867035
ENSG00000245573	BDNF-AS	60.1409	0.843421	0.228372	0.000221462	0.0090051
ENSG00000135220	UGT2A3	1666.18	2.20171	0.60073	0.000247287	0.00979886
ENSG00000133742	CA1	28548.9	2.36038	0.644412	0.00024943	0.009835
ENSG00000173467	AGR3	4344.99	0.503791	0.138243	0.000268181	0.0103165
ENSG00000108551	RASD1	564.71	1.10738	0.3053	0.000286519	0.0106831
ENSG00000101470	TNNC2	55.5599	1.75531	0.48423	0.000289031	0.0107372
ENSG00000007216	SLC13A2	461.575	1.28867	0.35726	0.000309652	0.0112753
ENSG00000124939	SCGB2A1	184.582	1.26115	0.34973	0.000310865	0.0112883
ENSG00000189223	PAX8-AS1	783.941	0.98954	0.274497	0.000312245	0.0112883
ENSG00000277639	AC007906.2	242.703	0.96369	0.267902	0.000321699	0.0115066
ENSG00000139988	RDH12	4.66055	2.38385	0.663616	0.00032788	0.0116044
ENSG00000243955	GSTA1	160.14	1.2837	0.358174	0.000338363	0.0117587
ENSG00000105552	BCAT2	1260.7	0.791783	0.221053	0.000341141	0.011805
ENSG00000110723	EXPH5	922.772	1.00867	0.281758	0.000343708	0.0118532
ENSG00000229334	AC046143.1	82.2619	0.65834	0.185139	0.000376656	0.0125816
ENSG00000174562	KLK15	273.979	1.49707	0.421595	0.000383809	0.0126812
ENSG00000186715	MST1L	224.508	1.31545	0.370523	0.000384871	0.0126882
ENSG00000232133	IMPDH1P10	17.6373	2.6096	0.736545	0.000395567	0.0129773
ENSG00000001626	CFTR	6792.02	0.458738	0.129888	0.000412735	0.0134371
ENSG00000039537	C6	13.9418	1.75983	0.498297	0.000412907	0.0134371
ENSG00000142484	TM4SF5	289.228	1.2519	0.354975	0.000420718	0.0136473
ENSG00000198650	TAT	21.9632	1.53942	0.437035	0.000427628	0.0137659
ENSG00000006042	TMEM98	2980.26	0.718443	0.204163	0.000433245	0.0138039
ENSG00000171243	SOSTDC1	328.111	0.706729	0.200852	0.000433742	0.0138039
ENSG00000139874	SSTR1	378.099	0.789471	0.22443	0.000435365	0.0138121
ENSG00000167037	SGSM1	149.177	1.00031	0.284334	0.000434696	0.0138121
ENSG00000189045	ANKDD1B	125.554	0.855287	0.243196	0.000436676	0.0138319
ENSG00000099960	SLC7A4	111.19	0.761272	0.216863	0.000447468	0.0140417
ENSG00000123545	NDUFAF4	659.347	0.48918	0.139373	0.000448349	0.0140476
ENSG00000165548	TMEM63C	224.499	1.38607	0.395862	0.000462804	0.0143031
ENSG00000171612	SLC25A33	473.503	0.484957	0.138875	0.000479333	0.014677
ENSG00000147852	VLDLR	331.435	1.31171	0.376565	0.000495187	0.0149362
ENSG00000143839	REN	19.7314	2.25281	0.646907	0.00049688	0.0149426
ENSG00000163541	SUCLG1	6054.06	0.55965	0.160826	0.000501688	0.0150648
ENSG00000124749	COL21A1	49.2014	0.937055	0.269359	0.000503603	0.0150999
ENSG00000189292	ALKAL2	115.812	1.09183	0.314186	0.000510628	0.0152652
ENSG00000196553	LINC00238	60.2632	1.18591	0.342191	0.000528973	0.0156745
ENSG00000167748	KLK1	2793.47	1.23957	0.358937	0.000553442	0.016116
ENSG00000087250	MT3	25.7697	1.41677	0.41087	0.000564307	0.0162451
ENSG00000270170	NCBP2-AS2	716.484	0.562582	0.163252	0.000568736	0.0163388
ENSG00000166869	CHP2	4816.88	1.66191	0.482575	0.000573516	0.0163703
ENSG00000162975	KCNF1	27.8862	1.34771	0.392142	0.000588643	0.0166609
ENSG00000196151	WDSUB1	249.389	0.420503	0.12243	0.000593355	0.0167474
ENSG00000137714	FDX1	1141.49	0.506772	0.147628	0.000597461	0.0167716
ENSG00000280594	AP000432.3	29.3211	0.88629	0.258204	0.000598007	0.0167716
ENSG00000173253	DMRT2	111.592	1.0023	0.292517	0.000611449	0.0169473
ENSG00000123560	PLP1	291.825	0.865365	0.252821	0.000619713	0.0170386
ENSG00000182816	KRTAP13-2	38.2507	2.22841	0.650847	0.000617383	0.0170386
ENSG00000113805	CNTN3	146.496	0.921081	0.269252	0.000624181	0.0170922
ENSG00000165092	ALDH1A1	3019.2	0.470413	0.137527	0.000625023	0.0170922
ENSG00000175274	TP53I11	3653.16	0.480398	0.140569	0.000631944	0.0172348
ENSG00000170545	SMAGP	2611.78	0.441511	0.129491	0.00065057	0.0176445
ENSG00000176894	PXMP2	1013.97	0.809347	0.238305	0.000683132	0.018237
ENSG00000096080	MRPS18A	2004.98	0.532164	0.156792	0.000688622	0.0183337
ENSG00000136999	NOV	204.417	0.739254	0.217962	0.000694712	0.0184144
ENSG00000104267	CA2	35081.5	1.02113	0.301268	0.000700318	0.0185003
ENSG00000137801	THBS1	7957.9	0.702462	0.207766	0.000722146	0.018904
ENSG00000102390	PBDC1	934.6	0.370918	0.109749	0.000725641	0.018946
ENSG00000104059	FAM189A1	217.604	1.43442	0.424563	0.000728604	0.0189541
ENSG00000140450	ARRDC4	3576.78	0.506161	0.14998	0.000738521	0.0191343
ENSG00000214530	STARD10	8383.42	0.795229	0.235672	0.000740031	0.0191489
ENSG00000166816	LDHD	1563.62	0.927978	0.275072	0.000741976	0.0191747
ENSG00000138769	CDKL2	34.2721	0.907137	0.270012	0.000780492	0.0199658
ENSG00000218274	AL121949.2	4.72149	3.03235	0.903111	0.000786016	0.020031
ENSG00000142623	PADI1	37.3774	0.995361	0.296648	0.000792634	0.0201235
ENSG00000175110	MRPS22	1351.96	0.372662	0.111219	0.000806063	0.0204132
ENSG00000272218	AC108865.2	11.8836	3.08039	0.919459	0.000807479	0.0204234
ENSG00000134240	HMGCS2	10313.5	2.48305	0.741395	0.000810563	0.0204521
ENSG00000083544	TDRD3	562.171	0.325504	0.0973645	0.000828323	0.0207689
ENSG00000114993	RTKN	1062.77	0.643941	0.192637	0.000829476	0.0207689
ENSG00000131969	ABHD12B	112.935	1.03311	0.309383	0.000840053	0.0208815
ENSG00000163002	NUP35	390.286	0.393955	0.118055	0.000846736	0.0209586
ENSG00000139540	SLC39A5	2847.88	0.783713	0.23523	0.000863217	0.0211708
ENSG00000205683	DPF3	258.096	0.734111	0.220325	0.000862414	0.0211708
ENSG00000229619	MBNL1-AS1	221.959	0.619597	0.185946	0.000861839	0.0211708
ENSG00000257194	AC126178.1	14.0828	1.86673	0.560295	0.000863198	0.0211708
ENSG00000107262	BAG1	4956.78	0.608591	0.182939	0.000878644	0.021471
ENSG00000189221	MAOA	12225.8	0.859307	0.258299	0.000878522	0.021471
ENSG00000157833	GAREM2	214.261	0.884176	0.266125	0.000892446	0.0217057
ENSG00000135617	PRADC1	911.933	0.645451	0.1944	0.000899463	0.02176
ENSG00000134202	GSTM3	423.815	0.452609	0.136596	0.000921412	0.0220888
ENSG00000106538	RARRES2	2312.62	0.448535	0.135461	0.000929066	0.0221932
ENSG00000109182	CWH43	1357.11	1.2743	0.385257	0.000940805	0.0223571
ENSG00000006695	COX10	851.244	0.44604	0.135676	0.0010107	0.0235586
ENSG00000158882	TOMM40L	786.138	0.417967	0.127217	0.00101818	0.0237016
ENSG00000134028	ADAMDEC1	13551.2	0.811078	0.247118	0.00103017	0.023902
ENSG00000244187	TMEM141	4014.91	0.569282	0.17406	0.00107314	0.0246724
ENSG00000214274	ANG	1074.28	0.464022	0.141922	0.00107718	0.0247092
ENSG00000113249	HAVCR1	57.2983	1.00134	0.307142	0.00111339	0.0251965
ENSG00000147364	FBXO25	1348.65	0.411224	0.126231	0.0011231	0.0252465
ENSG00000115616	SLC9A2	2822.5	0.706534	0.217271	0.00114655	0.0256313
ENSG00000112996	MRPS30	1152.06	0.352565	0.108461	0.00115161	0.0256874
ENSG00000184232	OAF	3462.19	0.890276	0.274372	0.00117541	0.0261031
ENSG00000260092	AC009163.2	13.1427	1.29394	0.398965	0.00118183	0.026217
ENSG00000189129	PLAC9	79.6143	0.682744	0.2107	0.00119379	0.0264241
ENSG00000065325	GLP2R	143.447	0.896028	0.277197	0.00122729	0.0269661
ENSG00000113722	CDX1	8443.9	0.624643	0.19338	0.00123737	0.0270627
ENSG00000135940	COX5B	10070.6	0.583477	0.180883	0.00125659	0.02729
ENSG00000232284	GNG12-AS1	18.1525	1.94925	0.604313	0.00125721	0.02729
ENSG00000168060	NAALADL1	332.737	1.32624	0.4121	0.00128979	0.0277058
ENSG00000186854	TRABD2A	3717.93	0.854495	0.265547	0.00129145	0.0277058
ENSG00000278621	AC037198.3	17.9035	2.00031	0.621907	0.00129804	0.0277881
ENSG00000109814	UGDH	7999.06	0.633502	0.197064	0.00130583	0.0278665
ENSG00000198125	MB	401.261	0.986969	0.307836	0.00134521	0.0284663
ENSG00000183049	CAMK1D	2219.04	0.576834	0.180246	0.001373	0.0289331
ENSG00000117115	PADI2	8749.89	1.78923	0.559436	0.00138254	0.0291038
ENSG00000066735	KIF26A	326.616	0.735742	0.230131	0.0013884	0.0291453
ENSG00000164684	ZNF704	1153.52	0.58695	0.183596	0.00138883	0.0291453
ENSG00000125246	CLYBL	454.518	0.731615	0.228895	0.00139205	0.0291825
ENSG00000141378	PTRH2	680.903	0.395461	0.12378	0.00139898	0.0292671
ENSG00000158856	DMTN	1001.36	0.415677	0.130147	0.00140366	0.0293346
ENSG00000240498	CDKN2B-AS1	632.726	2.11921	0.664848	0.00143501	0.0298049
ENSG00000187097	ENTPD5	5975.09	0.826668	0.259844	0.00146563	0.0301663
ENSG00000165795	NDRG2	4385.07	0.576393	0.181246	0.00147186	0.0302284
ENSG00000198840	MT-ND3	95181	0.694363	0.218444	0.00147952	0.0303546
ENSG00000170364	SETMAR	282.512	0.369705	0.116334	0.00148322	0.0303561
ENSG00000119599	DCAF4	409.875	0.476151	0.150114	0.00151429	0.0307252
ENSG00000162377	COA7	1420.55	0.57204	0.18049	0.00152766	0.0309369
ENSG00000237037	NDUFA6-AS1	61.6881	0.657276	0.207571	0.00154276	0.0311153
ENSG00000120053	GOT1	3012.64	0.502266	0.15871	0.00155254	0.0312502
ENSG00000127995	CASD1	1710.87	0.488449	0.154615	0.00158238	0.0316931
ENSG00000112530	PACRG	10.0911	1.28595	0.407611	0.00160586	0.0320186
ENSG00000203724	C1orf53	47.9655	0.638519	0.202409	0.00160724	0.0320186
ENSG00000111490	TBC1D30	282.274	0.548816	0.174315	0.00164156	0.0324601
ENSG00000278484	AC010998.3	13.786	2.18584	0.69467	0.00165187	0.0325684
ENSG00000013503	POLR3B	521.246	0.363157	0.115471	0.00166082	0.0326223
ENSG00000178821	TMEM52	73.852	0.773874	0.246065	0.0016609	0.0326223
ENSG00000126749	EMG1	509.583	0.297383	0.0946249	0.00167365	0.0327422
ENSG00000174514	MFSD4A	2404.52	1.04839	0.334462	0.00172109	0.0334132
ENSG00000076344	RGS11	89.0957	0.811054	0.25898	0.00173784	0.0335754
ENSG00000113272	THG1L	606.646	0.374471	0.120017	0.00180755	0.0343212
ENSG00000137440	FGFBP1	1535.94	0.459968	0.147616	0.00183336	0.0345297
ENSG00000103375	AQP8	5061.36	3.27099	1.05031	0.0018437	0.0346921
ENSG00000120915	EPHX2	2310.29	0.797245	0.256017	0.00184547	0.0346931
ENSG00000152785	BMP3	240.192	2.17603	0.699249	0.00185856	0.0349067
ENSG00000137634	NXPE4	5545.37	0.853393	0.274289	0.00186269	0.0349218
ENSG00000138193	PLCE1	2754.24	0.528641	0.170179	0.00189394	0.0352436
ENSG00000005187	ACSM3	1381.58	0.561229	0.18079	0.00190721	0.035418
ENSG00000087995	METTL2A	553.524	0.296851	0.0956319	0.00190857	0.035418
ENSG00000257303	AC073896.2	34.1427	0.753548	0.243263	0.00195051	0.0359652
ENSG00000162998	FRZB	1153.43	0.766506	0.247622	0.00196504	0.036101
ENSG00000168303	MPLKIP	752.947	0.301894	0.0975853	0.00197716	0.0361597
ENSG00000223361	FTH1P10	58.6716	1.53871	0.49736	0.00197643	0.0361597
ENSG00000116459	ATP5F1	9553.91	0.396952	0.128452	0.00199971	0.0365059
ENSG00000132437	DDC	1805.63	0.591305	0.191428	0.00200888	0.0365746
ENSG00000169021	UQCRFS1	5849.52	0.431187	0.139588	0.00200825	0.0365746
ENSG00000198093	ZNF649	269.027	0.403322	0.130594	0.00201263	0.0365767
ENSG00000204219	TCEA3	3107.52	0.725295	0.235042	0.00202995	0.0368252
ENSG00000167600	CYP2S1	1278.15	0.696016	0.225575	0.00203194	0.0368281
ENSG00000019102	VSIG2	5598.83	0.779747	0.252878	0.0020459	0.0369818
ENSG00000261437	AC108860.2	87.3272	0.597643	0.193818	0.00204556	0.0369818
ENSG00000157703	SVOPL	25.2881	1.55343	0.504273	0.00206631	0.0372332
ENSG00000105963	ADAP1	1802.41	0.564109	0.183163	0.0020713	0.037241
ENSG00000065717	TLE2	960.692	0.782929	0.254609	0.00210488	0.037744
ENSG00000197461	PDGFA	1177.66	0.596186	0.193957	0.00211346	0.0378299
ENSG00000243709	LEFTY1	3096.79	0.756382	0.246094	0.00211529	0.0378299
ENSG00000136883	KIF12	305.458	0.635948	0.207187	0.00214459	0.0379843
ENSG00000205795	CYS1	98.977	0.607225	0.197756	0.00213646	0.0379843
ENSG00000249453	AC092834.1	11.5622	1.84182	0.600543	0.00216269	0.0382043
ENSG00000104870	FCGRT	6755.63	0.704107	0.22972	0.00217619	0.0383757
ENSG00000171503	ETFDH	1640.05	0.529786	0.17312	0.00221168	0.038866
ENSG00000242366	UGT1A8	205.765	0.917275	0.299898	0.00222359	0.0390075
ENSG00000140538	NTRK3	43.8556	1.29686	0.424153	0.00223161	0.0390592
ENSG00000171234	UGT2B7	199.337	0.664871	0.21785	0.00227346	0.039539
ENSG00000274985	PTCHD3P1	4.80409	2.80153	0.918218	0.00228041	0.0396258
ENSG00000137819	PAQR5	1325.62	0.848067	0.278317	0.00231045	0.0399508
ENSG00000261167	AC107027.3	86.0245	0.485478	0.159314	0.00230911	0.0399508
ENSG00000164659	KIAA1324L	320.082	0.859998	0.282642	0.00234455	0.0403586
ENSG00000224032	EPB41L4A-AS1	391.42	0.457076	0.150365	0.00236746	0.0406836
ENSG00000089356	FXYD3	32895.5	0.75432	0.248248	0.00237705	0.0406841
ENSG00000184924	PTRHD1	786.214	0.389934	0.128331	0.00237755	0.0406841
ENSG00000224189	HAGLR	1372.88	0.612295	0.201448	0.00236999	0.0406841
ENSG00000225953	SATB2-AS1	569.312	1.0347	0.340445	0.00237153	0.0406841
ENSG00000101342	TLDC2	676.074	0.646685	0.212988	0.0023954	0.0408856
ENSG00000131771	PPP1R1B	8743.98	0.704523	0.232258	0.00241847	0.0411404
ENSG00000000003	TSPAN6	3230.15	0.46667	0.153888	0.00242511	0.0412188
ENSG00000155438	NIFK	1189.1	0.330878	0.109128	0.00242932	0.0412555
ENSG00000109819	PPARGC1A	1010.35	0.777385	0.256459	0.00243559	0.0413273
ENSG00000117480	FAAH	1278.12	0.697858	0.230354	0.00244955	0.0414945
ENSG00000141385	AFG3L2	4244.13	0.471398	0.155669	0.00246004	0.0416372
ENSG00000122971	ACADS	4534.72	0.717267	0.236887	0.00246271	0.0416476
ENSG00000186115	CYP4F2	90.3452	1.01019	0.334626	0.00253729	0.0425552
ENSG00000104537	ANXA13	1036.96	0.857146	0.284781	0.00261386	0.043369
ENSG00000197565	COL4A6	225.373	0.647952	0.215336	0.00262087	0.0434266
ENSG00000155918	RAET1L	10.2166	1.86975	0.621614	0.00263058	0.0435036
ENSG00000141542	RAB40B	620.113	0.722905	0.240477	0.002646	0.0437222
ENSG00000222001	AC106876.1	121.117	0.68646	0.228372	0.00264812	0.0437222
ENSG00000164687	FABP5	3755.03	0.598931	0.199356	0.00266173	0.043911
ENSG00000147036	LANCL3	192.956	1.03176	0.343599	0.00267509	0.0440954
ENSG00000151332	MBIP	491.531	0.352471	0.117412	0.00268204	0.0441738
ENSG00000155542	SETD9	249.252	0.57968	0.1933	0.00270988	0.0444873
ENSG00000186204	CYP4F12	1074.14	0.786481	0.262338	0.00271782	0.0445173
ENSG00000197635	DPP4	1294.12	0.57914	0.193348	0.0027416	0.0447508
ENSG00000253958	CLDN23	6037.83	0.81526	0.272281	0.00275178	0.0447783
ENSG00000159182	PRAC1	1755.47	0.614793	0.205369	0.00275706	0.0447803
ENSG00000271447	MMP28	1530.49	0.956319	0.319589	0.00276846	0.0448659
ENSG00000104823	ECH1	4496.41	0.516504	0.172625	0.00277105	0.044871
ENSG00000225706	PTPRD-AS1	39.9296	0.732048	0.244925	0.00280018	0.045019
ENSG00000159176	CSRP1	6539.72	0.382623	0.128059	0.00280932	0.0450866
ENSG00000283201	AC092329.3	17.9631	1.10549	0.370393	0.0028391	0.0454279
ENSG00000165194	PCDH19	196.42	0.897064	0.300916	0.00287204	0.0458098
ENSG00000111775	COX6A1	10755.1	0.476946	0.160032	0.00287957	0.0458937
ENSG00000178882	RFLNA	1702.42	0.929474	0.311924	0.00288425	0.0459085
ENSG00000178053	MLF1	169.786	0.815688	0.273798	0.00289036	0.045957
ENSG00000164972	C9orf24	40.7643	1.37113	0.460325	0.00289555	0.0460033
ENSG00000171914	TLN2	2305.47	0.592074	0.198963	0.0029223	0.0462103
ENSG00000238142	BX284668.5	139.313	0.533927	0.179414	0.00292081	0.0462103
ENSG00000153446	C16orf89	72.8126	0.728342	0.245419	0.00299994	0.0472531
ENSG00000090263	MRPS33	1319.13	0.436553	0.147156	0.00301102	0.0473371
ENSG00000115875	SRSF7	4488.02	0.272805	0.0919666	0.00301353	0.0473371
ENSG00000166681	BEX3	826.532	0.362615	0.122277	0.00302167	0.0473371
ENSG00000167920	TMEM99	136.864	0.432184	0.145703	0.00301499	0.0473371
ENSG00000188959	C9orf152	3013.3	0.618593	0.208954	0.00307208	0.0478303
ENSG00000198189	HSD17B11	6035.95	0.606806	0.205114	0.00309254	0.0480009
ENSG00000123739	PLA2G12A	1237.9	0.393476	0.133049	0.00310276	0.0480856
ENSG00000219073	CELA3B	16.5336	2.28514	0.772914	0.00311129	0.0481777
ENSG00000100814	CCNB1IP1	685.451	0.46525	0.157445	0.00312672	0.0481982
ENSG00000162882	HAAO	368.362	0.605966	0.205115	0.00313402	0.0482371
ENSG00000149927	DOC2A	72.891	1.06245	0.360754	0.00322875	0.0491338
ENSG00000148942	SLC5A12	12.1809	2.6582	0.903377	0.00325553	0.0494298
ENSG00000165496	RPL10L	22.1531	1.09361	0.371824	0.00326935	0.0495651
ENSG00000132434	LANCL2	842.875	0.359023	0.122168	0.00329521	0.0497705
ENSG00000184307	ZDHHC23	1363.5	0.549012	0.18688	0.00330581	0.0498933

## Sheet: down-regulated
gene symble	Gene name	baseMean	log2FoldChange	lfcSE	pvalue	padj
ENSG00000182885	ADGRG3	97.5541	-2.05845	0.243532	2.85151e-17	5.76261e-13
ENSG00000274536	AL034397.3	92.8116	-1.81474	0.223962	5.36677e-16	5.42286e-12
ENSG00000180871	CXCR2	117.905	-3.55999	0.472371	4.8304e-14	3.25392e-10
ENSG00000007908	SELE	76.971	-2.91455	0.420802	4.32366e-12	2.18442e-08
ENSG00000151651	ADAM8	382.136	-1.38844	0.213915	8.54948e-11	3.19333e-07
ENSG00000158125	XDH	5554.94	-1.22285	0.188857	9.48092e-11	3.19333e-07
ENSG00000188822	CNR2	46.269	-2.20975	0.343537	1.2566e-10	3.6278e-07
ENSG00000175857	GAPT	109.134	-1.52131	0.239009	1.95201e-10	4.93101e-07
ENSG00000280153	AC133065.6	90.7767	-1.46401	0.231249	2.43723e-10	5.47266e-07
ENSG00000163464	CXCR1	94.8223	-4.09564	0.67525	1.31652e-09	2.66055e-06
ENSG00000141527	CARD14	47.9268	-2.01536	0.333659	1.53935e-09	2.82807e-06
ENSG00000183625	CCR3	38.8095	-2.62176	0.435637	1.76347e-09	2.96984e-06
ENSG00000112195	TREML2	60.0268	-2.35721	0.395827	2.5983e-09	4.03915e-06
ENSG00000083454	P2RX5	93.7179	-2.06024	0.350235	4.04214e-09	5.83484e-06
ENSG00000126353	CCR7	180.493	-2.11208	0.360643	4.72951e-09	6.37192e-06
ENSG00000179583	CIITA	1505.23	-1.80213	0.310546	6.51017e-09	8.22275e-06
ENSG00000163534	FCRL1	93.3997	-2.472	0.428201	7.78743e-09	9.25742e-06
ENSG00000187912	CLEC17A	38.5276	-2.54207	0.441119	8.27444e-09	9.28989e-06
ENSG00000156510	HKDC1	1575.49	-1.40608	0.24515	9.71646e-09	1.03347e-05
ENSG00000128335	APOL2	2153.28	-1.1868	0.207955	1.14968e-08	1.1617e-05
ENSG00000099866	MADCAM1	354.588	-1.45186	0.257049	1.62145e-08	1.48945e-05
ENSG00000111913	RIPOR2	245.169	-2.06229	0.365047	1.6102e-08	1.48945e-05
ENSG00000257275	AL139020.1	13.7803	-6.5886	1.16969	1.77314e-08	1.55797e-05
ENSG00000100721	TCL1A	140.99	-4.96732	0.884792	1.97579e-08	1.6637e-05
ENSG00000062038	CDH3	365.981	-2.30514	0.415019	2.78746e-08	2.18424e-05
ENSG00000167656	LY6D	37.3488	-3.92904	0.707569	2.81014e-08	2.18424e-05
ENSG00000167767	KRT80	44.9027	-2.7274	0.494794	3.54386e-08	2.65251e-05
ENSG00000012124	CD22	414.614	-2.08895	0.382561	4.75008e-08	3.42837e-05
ENSG00000188263	IL17REL	52.4838	-2.85449	0.523571	4.98182e-08	3.47164e-05
ENSG00000143851	PTPN7	471.741	-1.28007	0.2355	5.46255e-08	3.56106e-05
ENSG00000028277	POU2F2	397.712	-1.32991	0.24698	7.2572e-08	4.0196e-05
ENSG00000102962	CCL22	105.711	-2.1599	0.400882	7.12951e-08	4.0196e-05
ENSG00000113749	HRH2	90.2486	-1.25459	0.233101	7.35936e-08	4.0196e-05
ENSG00000135480	KRT7	155.965	-2.15845	0.399109	6.36701e-08	4.0196e-05
ENSG00000138623	SEMA7A	342.102	-1.5809	0.292791	6.68615e-08	4.0196e-05
ENSG00000244682	FCGR2C	87.2952	-1.17099	0.21701	6.81378e-08	4.0196e-05
ENSG00000159958	TNFRSF13C	174.481	-1.84271	0.343782	8.31753e-08	4.42339e-05
ENSG00000126262	FFAR2	131.611	-1.58646	0.296736	8.97332e-08	4.64979e-05
ENSG00000086967	MYBPC2	15.1274	-2.14907	0.40262	9.41194e-08	4.75515e-05
ENSG00000169991	IFFO2	651.186	-0.868035	0.163667	1.13506e-07	5.59474e-05
ENSG00000237945	LINC00649	150.857	-0.987861	0.186863	1.24643e-07	5.9974e-05
ENSG00000188404	SELL	437.846	-2.15537	0.40859	1.32658e-07	6.2346e-05
ENSG00000173535	TNFRSF10C	85.2736	-2.05211	0.395026	2.04844e-07	9.40839e-05
ENSG00000198286	CARD11	369.492	-1.33205	0.257253	2.24313e-07	0.000100737
ENSG00000161405	IKZF3	808.468	-1.35259	0.263082	2.72817e-07	0.000117305
ENSG00000177257	DEFB4B	8.73394	-7.0031	1.36146	2.69209e-07	0.000117305
ENSG00000103522	IL21R	272.414	-1.74403	0.33975	2.84737e-07	0.000118027
ENSG00000177455	CD19	238.846	-2.06105	0.401582	2.86175e-07	0.000118027
ENSG00000092929	UNC13D	1753.88	-1.19794	0.233894	3.02721e-07	0.000119955
ENSG00000172023	REG1B	6524.38	-4.84217	0.944771	2.97182e-07	0.000119955
ENSG00000153064	BANK1	283.028	-1.95468	0.382737	3.27128e-07	0.000127133
ENSG00000159339	PADI4	13.0505	-2.6104	0.513232	3.65317e-07	0.000139296
ENSG00000124602	UNC5CL	257.1	-1.56849	0.309811	4.13284e-07	0.000151184
ENSG00000167895	TMC8	551.429	-1.09583	0.216385	4.09961e-07	0.000151184
ENSG00000203710	CR1	196.644	-1.804	0.356511	4.18937e-07	0.000151184
ENSG00000105639	JAK3	552.257	-1.42044	0.280902	4.26547e-07	0.000151229
ENSG00000124203	ZNF831	88.3989	-1.41594	0.280416	4.43179e-07	0.000152958
ENSG00000168918	INPP5D	1015.94	-0.916557	0.18157	4.46561e-07	0.000152958
ENSG00000148735	PLEKHS1	385.345	-1.73291	0.344098	4.75148e-07	0.000154875
ENSG00000173868	PHOSPHO1	11.9695	-2.82742	0.561097	4.67724e-07	0.000154875
ENSG00000198106	AC025279.1	27.4662	-2.21133	0.439005	4.72544e-07	0.000154875
ENSG00000198785	GRIN3A	111.438	-1.92992	0.383634	4.88882e-07	0.000156822
ENSG00000173762	CD7	313.602	-0.739968	0.147452	5.2116e-07	0.000164564
ENSG00000173432	SAA1	644.644	-4.16354	0.835201	6.1937e-07	0.000192567
ENSG00000124256	ZBP1	643.248	-1.61158	0.323764	6.43647e-07	0.000197083
ENSG00000228526	MIR34AHG	71.0061	-0.979866	0.19716	6.69838e-07	0.000202041
ENSG00000127311	HELB	260.593	-0.735646	0.148112	6.80525e-07	0.000202246
ENSG00000156234	CXCL13	628.441	-3.2235	0.650712	7.27756e-07	0.000207144
ENSG00000163739	CXCL1	2289.74	-3.18721	0.64313	7.20373e-07	0.000207144
ENSG00000171608	PIK3CD	539.382	-1.20992	0.244089	7.16311e-07	0.000207144
ENSG00000103313	MEFV	85.2953	-1.58317	0.320585	7.87703e-07	0.000209751
ENSG00000167483	FAM129C	77.5043	-2.22154	0.44922	7.60133e-07	0.000209751
ENSG00000175155	YPEL2	1537.37	-0.919829	0.186119	7.72676e-07	0.000209751
ENSG00000196329	GIMAP5	105.931	-0.929879	0.188307	7.88812e-07	0.000209751
ENSG00000124875	CXCL6	200.989	-3.31773	0.673067	8.25347e-07	0.000213839
ENSG00000265206	AC004687.1	204.494	-1.37758	0.279373	8.18173e-07	0.000213839
ENSG00000123329	ARHGAP9	487.698	-1.00822	0.204676	8.39604e-07	0.000214779
ENSG00000100003	SEC14L2	108.518	-1.2669	0.258125	9.19576e-07	0.000232131
ENSG00000146112	PPP1R18	1108.74	-1.02254	0.208486	9.36265e-07	0.000232131
ENSG00000151023	ENKUR	124.196	-2.33512	0.476224	9.41893e-07	0.000232131
ENSG00000079263	SP140	250.187	-1.50965	0.308188	9.65771e-07	0.000235148
ENSG00000093134	VNN3	12.9124	-2.90359	0.593711	1.00542e-06	0.000240605
ENSG00000105352	CEACAM4	21.4876	-2.91456	0.596111	1.012e-06	0.000240605
ENSG00000119698	PPP4R4	11.1987	-2.66961	0.546558	1.03738e-06	0.000243773
ENSG00000134827	TCN1	192.955	-3.918	0.80312	1.06908e-06	0.000248335
ENSG00000072818	ACAP1	524.216	-1.09931	0.226518	1.21551e-06	0.00027914
ENSG00000100078	PLA2G3	70.2876	-2.75053	0.568989	1.33768e-06	0.000303744
ENSG00000120217	CD274	430.082	-1.70412	0.353348	1.41579e-06	0.000317907
ENSG00000163508	EOMES	44.3268	-1.18011	0.245895	1.59257e-06	0.000352765
ENSG00000185811	IKZF1	763.337	-1.19612	0.249318	1.60594e-06	0.000352765
ENSG00000135144	DTX1	132.366	-1.46214	0.305108	1.64948e-06	0.000358435
ENSG00000160856	FCRL3	138.118	-1.83221	0.383293	1.75134e-06	0.000376519
ENSG00000155849	ELMO1	408.03	-0.753047	0.157881	1.84496e-06	0.000388384
ENSG00000197471	SPN	477.302	-1.08758	0.22795	1.83197e-06	0.000388384
ENSG00000050730	TNIP3	873.846	-3.91832	0.822502	1.89889e-06	0.000389825
ENSG00000126882	FAM78A	349.972	-1.03618	0.217537	1.90527e-06	0.000389825
ENSG00000198734	F5	72.8838	-0.922191	0.193626	1.90968e-06	0.000389825
ENSG00000272636	DOC2B	630.948	-1.86808	0.392487	1.93983e-06	0.000392021
ENSG00000104814	MAP4K1	327.832	-1.18111	0.248467	1.99854e-06	0.000396462
ENSG00000122122	SASH3	919.717	-1.17027	0.2462	2.00105e-06	0.000396462
ENSG00000148965	SAA4	6.5825	-3.67193	0.77354	2.06537e-06	0.000405234
ENSG00000179869	ABCA13	61.48	-1.30214	0.275912	2.36536e-06	0.00045963
ENSG00000013374	NUB1	2765.27	-0.51558	0.1094	2.44347e-06	0.00046415
ENSG00000128578	STRIP2	245.581	-1.84025	0.390734	2.48049e-06	0.00046415
ENSG00000211942	IGHV3-13	2739.37	-1.69526	0.359547	2.41725e-06	0.00046415
ENSG00000104974	LILRA1	69.3396	-1.90671	0.405322	2.54865e-06	0.00047253
ENSG00000115085	ZAP70	354.588	-1.03424	0.219999	2.58767e-06	0.000475402
ENSG00000197705	KLHL14	26.2189	-2.24385	0.477649	2.63114e-06	0.000479034
ENSG00000102879	CORO1A	2406.34	-1.16742	0.24968	2.92994e-06	0.000519396
ENSG00000158481	CD1C	83.7379	-1.66319	0.355621	2.9131e-06	0.000519396
ENSG00000171711	DEFB4A	99.2116	-6.77447	1.44797	2.88823e-06	0.000519396
ENSG00000104921	FCER2	86.0992	-1.95467	0.418887	3.06616e-06	0.000538818
ENSG00000128438	TBC1D27	57.3881	-1.08271	0.232545	3.22512e-06	0.000552343
ENSG00000225783	MIAT	586.604	-1.43277	0.307529	3.17757e-06	0.000552343
ENSG00000271856	LINC01215	30.1822	-2.28675	0.491084	3.21566e-06	0.000552343
ENSG00000023445	BIRC3	4972.64	-1.23228	0.264856	3.2769e-06	0.000556496
ENSG00000012779	ALOX5	715.644	-0.899199	0.193774	3.47664e-06	0.00056813
ENSG00000103569	AQP9	173.174	-3.87968	0.835922	3.46393e-06	0.00056813
ENSG00000137841	PLCB2	601.599	-0.720512	0.155286	3.48598e-06	0.00056813
ENSG00000168955	TM4SF20	218.241	-1.61435	0.347796	3.45629e-06	0.00056813
ENSG00000187764	SEMA4D	1090.49	-0.810789	0.175083	3.64105e-06	0.000588657
ENSG00000124102	PI3	9585.06	-1.74555	0.377393	3.74095e-06	0.000592853
ENSG00000127152	BCL11B	259.127	-0.731013	0.15811	3.77414e-06	0.000592853
ENSG00000177494	ZBED2	29.9757	-2.85803	0.618234	3.78435e-06	0.000592853
ENSG00000257335	MGAM	78.0376	-1.66706	0.360393	3.73398e-06	0.000592853
ENSG00000161791	FMNL3	721.146	-0.762971	0.16517	3.84998e-06	0.000598495
ENSG00000123405	NFE2	24.1139	-2.33519	0.505896	3.91303e-06	0.00060238
ENSG00000186431	FCAR	15.8202	-3.17894	0.688855	3.93459e-06	0.00060238
ENSG00000131355	ADGRE3	48.1368	-1.60756	0.349117	4.13193e-06	0.000623151
ENSG00000186517	ARHGAP30	1205.62	-1.10424	0.239745	4.10712e-06	0.000623151
ENSG00000166840	GLYATL1	31.3426	-2.08996	0.454056	4.16739e-06	0.000623842
ENSG00000154016	GRAP	169.405	-1.23797	0.269737	4.4424e-06	0.000650555
ENSG00000174837	ADGRE1	88.1015	-1.23619	0.269267	4.41234e-06	0.000650555
ENSG00000255071	SAA2-SAA4	7.87621	-5.346	1.16475	4.43591e-06	0.000650555
ENSG00000007171	NOS2	8892.19	-2.61071	0.569374	4.53494e-06	0.000659329
ENSG00000125735	TNFSF14	121.159	-1.00294	0.21887	4.59735e-06	0.000663628
ENSG00000134339	SAA2	259.037	-3.78797	0.827223	4.66904e-06	0.000669196
ENSG00000009790	TRAF3IP3	446.253	-1.09704	0.24045	5.05598e-06	0.00071452
ENSG00000161905	ALOX15	47.3022	-2.10225	0.460937	5.09555e-06	0.00071511
ENSG00000105122	RASAL3	410.628	-0.911018	0.199881	5.16894e-06	0.000715473
ENSG00000123843	C4BPB	618.072	-2.28863	0.502041	5.14809e-06	0.000715473
ENSG00000039560	RAI14	702.513	-0.651743	0.143049	5.21139e-06	0.000716443
ENSG00000197057	DTHD1	17.3671	-1.96255	0.431257	5.34486e-06	0.000729827
ENSG00000162747	FCGR3B	214.494	-3.10712	0.683754	5.51433e-06	0.000747914
ENSG00000166428	PLD4	59.8605	-0.885888	0.19522	5.68198e-06	0.000765514
ENSG00000137101	CD72	184.25	-1.86645	0.411696	5.79992e-06	0.000776229
ENSG00000138075	ABCG5	11.4058	-1.94781	0.429993	5.90227e-06	0.000779601
ENSG00000174175	SELP	278.634	-1.50791	0.332856	5.8925e-06	0.000779601
ENSG00000136286	MYO1G	438.117	-0.932363	0.206084	6.06277e-06	0.0007956
ENSG00000211892	IGHG4	3393.52	-1.57112	0.347448	6.1292e-06	0.000799128
ENSG00000189068	VSTM1	11.2876	-1.93834	0.429478	6.38412e-06	0.000821763
ENSG00000189120	SP6	309.857	-1.197	0.265719	6.64508e-06	0.000849939
ENSG00000167984	NLRC3	252.142	-1.00514	0.223425	6.83448e-06	0.000868666
ENSG00000106789	CORO2A	3449.44	-0.635769	0.141455	6.97385e-06	0.000879198
ENSG00000184922	FMNL1	867.163	-1.05677	0.235174	7.00435e-06	0.000879198
ENSG00000213886	UBD	460.231	-2.62176	0.584778	7.34849e-06	0.000916702
ENSG00000174885	NLRP6	24.1292	-1.49791	0.334275	7.42661e-06	0.000920763
ENSG00000163734	CXCL3	1070.42	-2.51944	0.562428	7.47877e-06	0.000921576
ENSG00000268104	SLC6A14	2667.84	-3.10092	0.692454	7.52879e-06	0.000922117
ENSG00000013725	CD6	382.706	-1.03056	0.230438	7.74235e-06	0.000942561
ENSG00000156738	MS4A1	830.695	-2.72555	0.611289	8.24604e-06	0.000981472
ENSG00000171700	RGS19	305.681	-0.998108	0.223791	8.19572e-06	0.000981472
ENSG00000175463	TBC1D10C	387.01	-1.09191	0.244866	8.22621e-06	0.000981472
ENSG00000198796	ALPK2	45.7428	-2.26279	0.50753	8.25624e-06	0.000981472
ENSG00000136573	BLK	156.158	-1.47422	0.330879	8.37158e-06	0.000989364
ENSG00000130234	ACE2	1298.39	-1.06437	0.239151	8.56155e-06	0.00100593
ENSG00000115386	REG1A	32706.7	-4.70614	1.06173	9.3129e-06	0.00108163
ENSG00000143546	S100A8	425.599	-2.95226	0.665982	9.29583e-06	0.00108163
ENSG00000081041	CXCL2	503.653	-2.47513	0.559199	9.59012e-06	0.00110747
ENSG00000119922	IFIT2	470.041	-0.953243	0.21555	9.76188e-06	0.0011209
ENSG00000185404	SP140L	624.069	-0.616906	0.139537	9.82081e-06	0.00112129
ENSG00000110944	IL23A	43.6878	-2.43823	0.551855	9.95082e-06	0.00112975
ENSG00000119535	CSF3R	449.336	-2.23665	0.50674	1.01569e-05	0.0011467
ENSG00000265107	GJA5	89.5028	-1.29223	0.293092	1.03873e-05	0.00116621
ENSG00000233355	CHRM3-AS2	46.2655	-1.6017	0.363712	1.06386e-05	0.00118781
ENSG00000182866	LCK	463.93	-0.99383	0.225884	1.08388e-05	0.00120352
ENSG00000167202	TBC1D2B	3178.14	-0.547971	0.124653	1.10273e-05	0.00121114
ENSG00000225217	HSPA7	89.8199	-0.854678	0.194413	1.10163e-05	0.00121114
ENSG00000116017	ARID3A	382.769	-0.928663	0.211467	1.12553e-05	0.00122951
ENSG00000116824	CD2	445.168	-1.08901	0.248183	1.14444e-05	0.00124344
ENSG00000174123	TLR10	152.696	-1.81697	0.414971	1.19468e-05	0.00128422
ENSG00000105339	DENND3	1317.82	-0.634387	0.145121	1.23433e-05	0.00131982
ENSG00000008513	ST3GAL1	1125.92	-1.27386	0.291752	1.26406e-05	0.00132567
ENSG00000151948	GLT1D1	22.5255	-2.58087	0.590946	1.25764e-05	0.00132567
ENSG00000163563	MNDA	292.051	-1.56724	0.358973	1.26604e-05	0.00132567
ENSG00000253686	LINC01484	10.6029	-2.90775	0.665777	1.257e-05	0.00132567
ENSG00000005844	ITGAL	871.069	-1.01775	0.233388	1.29605e-05	0.00134449
ENSG00000134516	DOCK2	979.874	-0.984539	0.225783	1.29732e-05	0.00134449
ENSG00000184221	OLIG1	8.51716	-2.45975	0.564272	1.30563e-05	0.00134619
ENSG00000164691	TAGAP	424.246	-1.33357	0.306127	1.32304e-05	0.00135037
ENSG00000283652		94.9512	-1.68996	0.387894	1.31999e-05	0.00135037
ENSG00000173200	PARP15	176.76	-1.40993	0.323781	1.33331e-05	0.00135401
ENSG00000000938	FGR	350.233	-1.50087	0.345198	1.37468e-05	0.00137954
ENSG00000168071	CCDC88B	2209.77	-0.677906	0.15589	1.36997e-05	0.00137954
ENSG00000170456	DENND5B	541.052	-0.937018	0.215559	1.38062e-05	0.00137954
ENSG00000157551	KCNJ15	40.8026	-2.35151	0.54255	1.46309e-05	0.00143202
ENSG00000163221	S100A12	29.2016	-3.38926	0.782278	1.4739e-05	0.00143202
ENSG00000153563	CD8A	316.649	-0.717777	0.165736	1.4854e-05	0.00143629
ENSG00000135426	TESPA1	116.64	-1.02388	0.236703	1.52122e-05	0.00146392
ENSG00000133048	CHI3L1	1820.83	-3.54978	0.821255	1.54347e-05	0.00147829
ENSG00000142748	FCN3	49.8516	-2.42847	0.562914	1.60256e-05	0.00152765
ENSG00000112115	IL17A	13.2806	-2.72508	0.633274	1.68376e-05	0.00159005
ENSG00000135898	GPR55	98.7343	-1.02401	0.237928	1.6783e-05	0.00159005
ENSG00000139190	VAMP1	268.983	-0.792715	0.184308	1.70009e-05	0.00159801
ENSG00000140678	ITGAX	672.234	-1.55545	0.362091	1.74108e-05	0.00162896
ENSG00000104894	CD37	609.419	-1.20467	0.280787	1.78416e-05	0.00166157
ENSG00000007312	CD79B	380.071	-1.52453	0.355654	1.81461e-05	0.00167765
ENSG00000162739	SLAMF6	261.708	-1.35486	0.316177	1.82633e-05	0.00167765
ENSG00000267121	AC008105.3	114.311	-1.2218	0.285119	1.82551e-05	0.00167765
ENSG00000107742	SPOCK2	1163.16	-1.07673	0.251461	1.85325e-05	0.00169467
ENSG00000211898	IGHD	505.966	-2.31052	0.539846	1.86924e-05	0.00170159
ENSG00000049249	TNFRSF9	107.4	-1.62846	0.380774	1.89669e-05	0.00170356
ENSG00000137673	MMP7	523.831	-4.74771	1.10997	1.89132e-05	0.00170356
ENSG00000245164	LINC00861	50.1401	-1.69374	0.39594	1.88782e-05	0.00170356
ENSG00000128218	VPREB3	73.8643	-1.71832	0.402088	1.92438e-05	0.00172079
ENSG00000077420	APBB1IP	316.056	-0.996518	0.233308	1.9437e-05	0.00172377
ENSG00000131389	SLC6A6	912.506	-1.00951	0.236411	1.9533e-05	0.00172377
ENSG00000160683	CXCR5	139.378	-2.52087	0.590239	1.94661e-05	0.00172377
ENSG00000168461	RAB31	1344.69	-0.851315	0.199445	1.96854e-05	0.00172388
ENSG00000196092	PAX5	253.813	-2.63048	0.616297	1.97049e-05	0.00172388
ENSG00000226777	FAM30A	1044.53	-1.21246	0.284215	1.99023e-05	0.00173364
ENSG00000162551	ALPL	256.849	-1.34829	0.31621	2.00895e-05	0.00174244
ENSG00000112182	BACH2	107.092	-1.27326	0.298872	2.04227e-05	0.00176377
ENSG00000100342	APOL1	5359.69	-1.46345	0.343967	2.09391e-05	0.00176488
ENSG00000100368	CSF2RB	1522.08	-1.23833	0.291041	2.09217e-05	0.00176488
ENSG00000108342	CSF3	30.5737	-4.43908	1.04258	2.06446e-05	0.00176488
ENSG00000133962	CATSPERB	161.653	-1.08093	0.254125	2.10419e-05	0.00176488
ENSG00000140379	BCL2A1	210.786	-1.73145	0.407067	2.10468e-05	0.00176488
ENSG00000180096	2017-09-01	440.407	-1.0673	0.25073	2.07391e-05	0.00176488
ENSG00000243649	CFB	712.073	-1.43452	0.337171	2.09456e-05	0.00176488
ENSG00000050438	SLC4A8	70.6647	-0.908132	0.213577	2.11864e-05	0.00176924
ENSG00000095383	TBC1D2	1212	-0.486181	0.114558	2.19589e-05	0.0018262
ENSG00000155966	AFF2	24.5241	-2.61529	0.617363	2.27304e-05	0.00186049
ENSG00000159753	CARMIL2	220.969	-1.08756	0.256659	2.26152e-05	0.00186049
ENSG00000169248	CXCL11	364.217	-2.73692	0.645736	2.25072e-05	0.00186049
ENSG00000178826	TMEM139	548.775	-0.667038	0.157464	2.27394e-05	0.00186049
ENSG00000159261	CLDN14	25.7339	-2.30853	0.545522	2.31854e-05	0.00187994
ENSG00000147454	SLC25A37	1682.57	-0.535023	0.126509	2.34581e-05	0.00188871
ENSG00000100767	PAPLN	652.288	-0.995383	0.235432	2.35876e-05	0.0018914
ENSG00000167207	NOD2	107.639	-1.23652	0.292537	2.36955e-05	0.0018914
ENSG00000188089	PLA2G4E	13.5337	-1.95653	0.462957	2.37723e-05	0.0018914
ENSG00000131203	IDO1	3472.62	-3.37593	0.800041	2.44637e-05	0.00193877
ENSG00000167208	SNX20	348.683	-1.25598	0.297967	2.49583e-05	0.00195244
ENSG00000168685	IL7R	1282.45	-1.3446	0.319034	2.50226e-05	0.00195244
ENSG00000187583	PLEKHN1	51.3378	-1.1999	0.284541	2.47636e-05	0.00195244
ENSG00000263264	AC119396.1	20.7333	-2.25072	0.533941	2.49443e-05	0.00195244
ENSG00000183091	NEB	17.5575	-1.72948	0.410925	2.56804e-05	0.00198841
ENSG00000271699	SNX29P2	4.38944	-6.56331	1.55918	2.55969e-05	0.00198841
ENSG00000124731	TREM1	59.7599	-2.36544	0.562739	2.62886e-05	0.00202774
ENSG00000101265	RASSF2	1052.62	-0.893661	0.212672	2.64502e-05	0.00203244
ENSG00000183844	FAM3B	82.112	-3.14793	0.750437	2.73114e-05	0.00209066
ENSG00000182183	FAM159A	14.6386	-1.73844	0.414518	2.74212e-05	0.00209115
ENSG00000158023	WDR66	37.1162	-1.36512	0.325575	2.75341e-05	0.00209187
ENSG00000110665	C11orf21	38.7082	-1.46996	0.350877	2.79717e-05	0.00210514
ENSG00000146094	DOK3	427.294	-1.15577	0.275908	2.80213e-05	0.00210514
ENSG00000172724	CCL19	624.805	-2.71545	0.648066	2.78842e-05	0.00210514
ENSG00000197536	C5orf56	356.881	-0.62893	0.150297	2.85696e-05	0.00212266
ENSG00000140968	IRF8	1681.15	-0.453465	0.10848	2.91269e-05	0.00215054
ENSG00000169385	RNASE2	10.8052	-2.55192	0.610515	2.91578e-05	0.00215054
ENSG00000149256	TENM4	86.736	-1.53784	0.36829	2.97165e-05	0.00218378
ENSG00000082074	FYB	828.18	-0.995774	0.238603	3.00155e-05	0.00219776
ENSG00000136167	LCP1	4437.59	-1.24757	0.299094	3.03044e-05	0.00221091
ENSG00000117322	CR2	531.847	-2.48574	0.596635	3.09633e-05	0.00225085
ENSG00000081237	PTPRC	3120.09	-1.28622	0.309204	3.18534e-05	0.00229344
ENSG00000196405	EVL	1093.48	-0.782022	0.188007	3.18896e-05	0.00229344
ENSG00000112303	VNN2	232.092	-1.69789	0.409442	3.37106e-05	0.00241572
ENSG00000189233	NUGGC	184.407	-1.31522	0.317224	3.38289e-05	0.00241572
ENSG00000134954	ETS1	3144.8	-0.771031	0.186052	3.41058e-05	0.00242008
ENSG00000188676	IDO2	13.3714	-2.47327	0.596831	3.41295e-05	0.00242008
ENSG00000142347	MYO1F	866.128	-0.99813	0.241373	3.54613e-05	0.002497
ENSG00000144837	PLA1A	99.7036	-1.88257	0.455601	3.59516e-05	0.00252273
ENSG00000119771	KLHL29	235.251	-0.687967	0.166698	3.67481e-05	0.0025697
ENSG00000227507	LTB	628.04	-1.41562	0.343772	3.82313e-05	0.00265504
ENSG00000072694	FCGR2B	271.201	-1.05775	0.257074	3.87911e-05	0.00268469
ENSG00000100344	PNPLA3	10.8761	-2.38454	0.579649	3.89253e-05	0.00268479
ENSG00000078081	LAMP3	287.391	-1.7357	0.422191	3.93674e-05	0.00270504
ENSG00000144802	NFKBIZ	3820.76	-0.889361	0.216365	3.94866e-05	0.00270504
ENSG00000068831	RASGRP2	260.782	-1.21336	0.295311	3.97786e-05	0.00271583
ENSG00000159337	PLA2G4D	33.7835	-1.24354	0.302889	4.03263e-05	0.00274395
ENSG00000111732	AICDA	18.5596	-3.41449	0.832226	4.08108e-05	0.00275835
ENSG00000148175	STOM	4120.07	-1.08547	0.265329	4.29487e-05	0.00288914
ENSG00000183813	CCR4	94.0721	-1.59686	0.390375	4.30319e-05	0.00288914
ENSG00000149485	FADS1	544.773	-1.51304	0.370118	4.35129e-05	0.00291176
ENSG00000169429	CXCL8	491.442	-3.08047	0.75431	4.42997e-05	0.00294491
ENSG00000227039	ITGB2-AS1	126.864	-1.39273	0.340979	4.41735e-05	0.00294491
ENSG00000254415	SIGLEC14	50.5784	-1.42418	0.349114	4.51477e-05	0.00299144
ENSG00000171051	FPR1	289.896	-2.35463	0.577433	4.54741e-05	0.00300322
ENSG00000112212	TSPO2	8.48357	-3.59284	0.881801	4.61262e-05	0.00303637
ENSG00000170542	SERPINB9	604.035	-1.15125	0.282678	4.64844e-05	0.00305001
ENSG00000138964	PARVG	494.681	-1.01308	0.248841	4.67775e-05	0.00305931
ENSG00000104415	WISP1	158.097	-2.4678	0.606528	4.72677e-05	0.00306025
ENSG00000138449	SLC40A1	11281.7	-0.812818	0.199803	4.73976e-05	0.00306025
ENSG00000166501	PRKCB	606.601	-1.2419	0.305276	4.73966e-05	0.00306025
ENSG00000198520	C1orf228	37.065	-1.07272	0.263676	4.73536e-05	0.00306025
ENSG00000136490	LIMD2	652.294	-1.31397	0.323389	4.84193e-05	0.00311626
ENSG00000116701	NCF2	620.623	-1.2099	0.297987	4.90212e-05	0.00313503
ENSG00000091592	NLRP1	559.899	-0.635745	0.156665	4.9498e-05	0.00315554
ENSG00000102245	CD40LG	74.3739	-0.946811	0.233399	4.97889e-05	0.0031641
ENSG00000147689	FAM83A	121.661	-2.57974	0.636068	4.99703e-05	0.00316568
ENSG00000054938	CHRDL2	110.313	-2.63369	0.649576	5.02488e-05	0.00317337
ENSG00000125354	2017-09-06	991.895	-0.864206	0.213221	5.05419e-05	0.00318193
ENSG00000058866	DGKG	27.9495	-1.30622	0.322365	5.07855e-05	0.00318734
ENSG00000134594	RAB33A	23.17	-1.2238	0.302565	5.2381e-05	0.0032773
ENSG00000003400	CASP10	3552.97	-0.638401	0.158056	5.36612e-05	0.00333699
ENSG00000128340	RAC2	1697.71	-0.979961	0.242621	5.36652e-05	0.00333699
ENSG00000100055	CYTH4	724.749	-0.873074	0.216671	5.58974e-05	0.003444
ENSG00000163421	PROK2	34.3373	-4.11681	1.02152	5.57578e-05	0.003444
ENSG00000054598	FOXC1	35.5972	-1.39221	0.345823	5.67882e-05	0.00347768
ENSG00000134757	DSG3	90.5189	-2.62072	0.650918	5.66888e-05	0.00347768
ENSG00000141506	PIK3R5	415.255	-0.830776	0.206411	5.70083e-05	0.00348061
ENSG00000075618	FSCN1	674.488	-0.960285	0.238853	5.81013e-05	0.00353665
ENSG00000176971	FIBIN	110.762	-1.07727	0.26824	5.91813e-05	0.00359158
ENSG00000261644	AC007728.2	22.6081	-1.50609	0.375698	6.10304e-05	0.00368168
ENSG00000124721	DNAH8	9.61451	-2.33507	0.583847	6.34895e-05	0.00380941
ENSG00000169403	PTAFR	758.035	-1.19395	0.298538	6.35247e-05	0.00380941
ENSG00000174130	TLR6	160.715	-1.20254	0.30077	6.38273e-05	0.00381623
ENSG00000111536	IL26	17.5288	-2.31298	0.578766	6.43128e-05	0.00383392
ENSG00000069424	KCNAB2	619.758	-0.930172	0.232945	6.52142e-05	0.00387622
ENSG00000015285	WAS	381.323	-0.969371	0.242943	6.60399e-05	0.00391378
ENSG00000174500	GCSAM	75.9446	-1.52301	0.381946	6.67731e-05	0.00394567
ENSG00000084110	HAL	16.1759	-1.66021	0.416484	6.71277e-05	0.00395506
ENSG00000152128	TMEM163	67.2131	-1.88681	0.474478	6.99071e-05	0.00410684
ENSG00000078098	FAP	125.308	-1.85814	0.467925	7.15673e-05	0.00418007
ENSG00000140274	DUOXA2	4728.73	-2.50271	0.631354	7.36942e-05	0.00429189
ENSG00000155926	SLA	712.307	-1.115	0.281359	7.40425e-05	0.00429978
ENSG00000138795	LEF1	174.571	-0.791482	0.199823	7.46634e-05	0.00432342
ENSG00000126759	CFP	192.246	-1.23052	0.310895	7.55831e-05	0.00432708
ENSG00000183918	SH2D1A	102.398	-1.29045	0.32602	7.55221e-05	0.00432708
ENSG00000196839	ADA	232.991	-1.0161	0.256703	7.54869e-05	0.00432708
ENSG00000018280	SLC11A1	98.4016	-1.73495	0.438613	7.63599e-05	0.00434516
ENSG00000020633	RUNX3	531.596	-0.902528	0.228199	7.65318e-05	0.00434516
ENSG00000243811	APOBEC3D	137.388	-0.765647	0.193646	7.69041e-05	0.00435338
ENSG00000215252	GOLGA8B	392.462	-0.604307	0.152963	7.79349e-05	0.00439941
ENSG00000168679	SLC16A4	93.7601	-1.16703	0.295587	7.87518e-05	0.00440858
ENSG00000254838	GVINP1	345.951	-1.21517	0.307713	7.84636e-05	0.00440858
ENSG00000260997	AC004847.1	23.5576	-1.17692	0.298078	7.86854e-05	0.00440858
ENSG00000160791	CCR5	353.58	-1.05209	0.267135	8.20137e-05	0.00456588
ENSG00000187621	TCL6	11.8049	-2.00544	0.509142	8.18712e-05	0.00456588
ENSG00000142405	NLRP12	11.7308	-1.71264	0.434965	8.23628e-05	0.00457272
ENSG00000026036	RTEL1-TNFRSF6B	246.835	-1.5496	0.393748	8.30152e-05	0.00459631
ENSG00000134817	APLNR	794.446	-0.571238	0.145226	8.37414e-05	0.00462385
ENSG00000088992	TESC	92.7058	-1.11905	0.284574	8.41166e-05	0.00463191
ENSG00000198851	CD3E	503.106	-0.844594	0.214856	8.46004e-05	0.00464589
ENSG00000107099	DOCK8	1102.47	-0.95364	0.242663	8.49808e-05	0.00465414
ENSG00000156127	BATF	153.002	-1.21041	0.308146	8.56369e-05	0.00467739
ENSG00000128383	APOBEC3A	92.0492	-1.10353	0.281072	8.63226e-05	0.00470094
ENSG00000239951	IGKV3-20	24028.6	-1.41049	0.359492	8.72524e-05	0.0047273
ENSG00000125245	GPR18	53.459	-1.60677	0.409834	8.83521e-05	0.00477408
ENSG00000127084	FGD3	357.566	-0.750095	0.191387	8.88241e-05	0.00478679
ENSG00000126001	CEP250	933.727	-0.375144	0.0957423	8.91873e-05	0.00479358
ENSG00000160219	GAB3	168.1	-0.783961	0.200193	9.00225e-05	0.00482564
ENSG00000159618	ADGRG5	227.26	-1.04673	0.267398	9.05859e-05	0.00483563
ENSG00000163347	CLDN1	326.702	-1.3156	0.336312	9.1595e-05	0.00487117
ENSG00000176788	BASP1	686.607	-1.19859	0.306775	9.34232e-05	0.00494987
ENSG00000211661	IGLV3-22	4.91874	-3.71368	0.950593	9.35648e-05	0.00494987
ENSG00000081059	TCF7	395.066	-0.72703	0.186156	9.40379e-05	0.00496191
ENSG00000115919	KYNU	300.923	-2.21434	0.567197	9.46145e-05	0.00496948
ENSG00000143297	FCRL5	951.573	-1.38897	0.355794	9.46731e-05	0.00496948
ENSG00000173821	RNF213	8793.25	-1.00624	0.257858	9.5285e-05	0.00498052
ENSG00000196358	NTNG2	27.0296	-1.19794	0.307073	9.5732e-05	0.00498621
ENSG00000183615	FAM167B	114.51	-1.22099	0.313088	9.62572e-05	0.00500067
ENSG00000112559	MDFI	118.534	-1.28908	0.331269	9.96973e-05	0.00512755
ENSG00000151702	FLI1	618.967	-0.766761	0.19703	9.95887e-05	0.00512755
ENSG00000122025	FLT3	39.9775	-1.50324	0.386778	0.000101669	0.00521478
ENSG00000101445	PPP1R16B	846.396	-1.02028	0.262718	0.000102935	0.00524871
ENSG00000152969	JAKMIP1	20.4297	-1.72408	0.443885	0.000102721	0.00524871
ENSG00000137078	SIT1	139.748	-1.13011	0.291172	0.000103921	0.00527674
ENSG00000163599	CTLA4	137.154	-1.78761	0.460931	0.000105206	0.00532858
ENSG00000160183	TMPRSS3	61.9767	-0.865454	0.223227	0.00010575	0.00534277
ENSG00000158485	CD1B	20.5894	-2.06492	0.53327	0.000107867	0.0054226
ENSG00000140279	DUOX2	20237	-2.23542	0.57772	0.000109109	0.00547141
ENSG00000059145	UNKL	340.555	-0.553753	0.143285	0.000111227	0.00556382
ENSG00000186174	BCL9L	1452.48	-0.568498	0.147138	0.000111673	0.00557233
ENSG00000137462	TLR2	228.188	-1.21967	0.31664	0.000117193	0.00583337
ENSG00000159399	HK2	19943.1	-0.717667	0.186597	0.000120024	0.0059596
ENSG00000133317	LGALS12	19.4828	-2.19835	0.572124	0.000121816	0.00603376
ENSG00000253364	AL928742.1	259.495	-2.02288	0.526881	0.000123366	0.00609563
ENSG00000125910	S1PR4	131.361	-1.31286	0.342008	0.000123704	0.00609741
ENSG00000143869	GDF7	41.7408	-1.39902	0.36487	0.000125928	0.00619193
ENSG00000139436	GIT2	1228.43	-0.403103	0.105153	0.000126342	0.00619719
ENSG00000169220	RGS14	380.541	-0.533007	0.139064	0.000126685	0.00619896
ENSG00000010671	BTK	389.203	-1.01208	0.264099	0.000127009	0.00619947
ENSG00000109625	CPZ	9.38438	-1.97985	0.516716	0.000127309	0.00619947
ENSG00000211976	IGHV3-73	1466.87	-1.357	0.354219	0.000127648	0.00620105
ENSG00000176170	SPHK1	205.932	-1.1028	0.288024	0.000128751	0.00622469
ENSG00000172578	KLHL6	879.365	-1.25739	0.328506	0.000129397	0.006241
ENSG00000135439	AGAP2	221.23	-0.922275	0.241096	0.000130589	0.00628351
ENSG00000158517	NCF1	272.371	-1.26856	0.331692	0.000131027	0.00628963
ENSG00000107968	MAP3K8	439.955	-1.06269	0.277991	0.00013197	0.00631986
ENSG00000232810	TNF	94.6348	-1.26812	0.331963	0.000133414	0.00637391
ENSG00000122188	LAX1	495.715	-1.38657	0.363235	0.000134928	0.00643104
ENSG00000102145	GATA1	7.1852	-1.85112	0.48533	0.000136655	0.00645248
ENSG00000177409	SAMD9L	2222.06	-1.1641	0.305176	0.00013644	0.00645248
ENSG00000113916	BCL6	471.598	-0.902582	0.236763	0.000137751	0.00647396
ENSG00000128422	KRT17	42.996	-2.21864	0.581984	0.000137732	0.00647396
ENSG00000162654	GBP4	1897.77	-1.45007	0.380676	0.00013941	0.00652162
ENSG00000056558	TRAF1	425.924	-1.04565	0.275418	0.000146707	0.00684713
ENSG00000095370	SH2D3C	270.23	-0.758639	0.199906	0.000147655	0.00687548
ENSG00000163219	ARHGAP25	511.567	-0.955391	0.251839	0.00014844	0.00688031
ENSG00000204252	HLA-DOA	1204.26	-1.04759	0.27613	0.000148342	0.00688031
ENSG00000132357	CARD6	193.266	-0.849484	0.224075	0.000149996	0.0069207
ENSG00000102970	CCL17	10.9527	-2.81355	0.742418	0.000150821	0.0069429
ENSG00000183688	RFLNB	440.651	-0.592735	0.156585	0.000153468	0.007036
ENSG00000205403	CFI	574.324	-1.44677	0.382209	0.000153539	0.007036
ENSG00000162366	PDZK1IP1	4213.67	-1.16736	0.308496	0.000154309	0.00705525
ENSG00000137478	FCHSD2	880.216	-0.463435	0.122509	0.000155033	0.00707236
ENSG00000184602	SNN	495.686	-0.839028	0.221839	0.000155481	0.00707682
ENSG00000185479	KRT6B	73.3397	-2.9096	0.770335	0.000158691	0.00719056
ENSG00000139899	CBLN3	66.7299	-0.790592	0.209386	0.000159522	0.00721204
ENSG00000225614	ZNF469	102.918	-1.02356	0.271422	0.000162519	0.00733112
ENSG00000187961	KLHL17	180.858	-0.513319	0.136169	0.000163434	0.00735598
ENSG00000163053	SLC16A14	414.913	-0.979353	0.259901	0.000164446	0.0073851
ENSG00000065923	SLC9A7	264.369	-0.867656	0.23042	0.000166187	0.00744671
ENSG00000124201	ZNFX1	2959.03	-0.628638	0.166998	0.000166991	0.00744972
ENSG00000099308	MAST3	1088.81	-0.43464	0.115513	0.000168099	0.00748262
ENSG00000138755	CXCL9	2285.95	-2.79975	0.744314	0.000168889	0.00750128
ENSG00000105851	PIK3CG	357.121	-0.823998	0.219535	0.000174469	0.00773212
ENSG00000241106	HLA-DOB	167.595	-1.31125	0.34991	0.000178677	0.00790128
ENSG00000029153	ARNTL2	540.572	-1.15544	0.308487	0.000180034	0.0079439
ENSG00000111728	ST8SIA1	84.045	-0.864397	0.230874	0.0001811	0.00795963
ENSG00000151790	TDO2	171.744	-1.69199	0.452064	0.000181966	0.00795963
ENSG00000186265	BTLA	82.2713	-1.31744	0.351954	0.000181679	0.00795963
ENSG00000204839	MROH6	411.36	-0.654307	0.174776	0.00018134	0.00795963
ENSG00000071575	TRIB2	644.296	-1.07223	0.286612	0.000183255	0.00798711
ENSG00000205744	DENND1C	264.689	-0.799223	0.213646	0.000183385	0.00798711
ENSG00000124126	PREX1	1327.5	-0.732237	0.19591	0.000185765	0.0080734
ENSG00000113263	ITK	219.736	-1.12237	0.300435	0.000187099	0.00809653
ENSG00000088836	SLC4A11	41.7472	-1.36884	0.366547	0.000188159	0.00812501
ENSG00000162894	FCMR	326.155	-1.10607	0.29632	0.000189439	0.00816285
ENSG00000197943	PLCG2	1235.8	-0.74093	0.198541	0.000190054	0.00817194
ENSG00000143921	ABCG8	18.7926	-1.41407	0.379003	0.000190691	0.00818188
ENSG00000103534	TMC5	4017.01	-0.684781	0.18393	0.000196837	0.00837447
ENSG00000110448	CD5	289.053	-0.918761	0.246743	0.00019644	0.00837447
ENSG00000140464	PML	1544.22	-0.698967	0.187785	0.000197512	0.00838554
ENSG00000149968	MMP3	1665.07	-2.80377	0.753403	0.000198062	0.00839129
ENSG00000188001	TPRG1	28.1105	-1.26399	0.339831	0.000199632	0.00842249
ENSG00000211751	AC245427.1	378.014	-0.879301	0.236384	0.00019938	0.00842249
ENSG00000163600	ICOS	106.289	-1.5803	0.424968	0.000200294	0.00843279
ENSG00000160991	ORAI2	1031.79	-0.914615	0.245995	0.000200791	0.00843613
ENSG00000170581	STAT2	2314.14	-0.533483	0.143699	0.000205227	0.00860465
ENSG00000165188	RNF183	63.101	-1.37848	0.371447	0.000206352	0.0086339
ENSG00000043462	LCP2	706.797	-0.896102	0.241542	0.000207319	0.00863859
ENSG00000173578	XCR1	64.6052	-1.80166	0.485608	0.000207176	0.00863859
ENSG00000166527	CLEC4D	13.3074	-3.02621	0.815838	0.000207811	0.00864128
ENSG00000239998	LILRA2	55.6284	-1.6545	0.446345	0.000209921	0.00869323
ENSG00000211599	IGKV5-2	252.394	-1.55715	0.42044	0.000212536	0.0087656
ENSG00000224397	SMIM25	73.37	-1.71225	0.462302	0.000212434	0.0087656
ENSG00000158055	GRHL3	45.9198	-1.85589	0.501632	0.000215857	0.00888442
ENSG00000131042	LILRB2	413.653	-1.114	0.301166	0.000216476	0.0088918
ENSG00000023171	GRAMD1B	118.216	-0.927386	0.250804	0.000217599	0.00891627
ENSG00000180720	CHRM4	20.9253	-1.85726	0.502335	0.000217954	0.00891627
ENSG00000064692	SNCAIP	105.435	-1.13242	0.306442	0.00021955	0.00894535
ENSG00000211949	IGHV3-23	15611.5	-1.09118	0.29528	0.000219544	0.00894535
ENSG00000163735	CXCL5	189.395	-3.71245	1.00571	0.000223037	0.00905091
ENSG00000055163	CYFIP2	1006.52	-0.440409	0.119336	0.000223805	0.0090639
ENSG00000178175	ZNF366	73.4166	-1.09403	0.296491	0.000224324	0.00906621
ENSG00000211965	IGHV3-49	3050.55	-1.38064	0.37424	0.000224971	0.00906621
ENSG00000276231	PIK3R6	81.829	-0.696354	0.188769	0.000225209	0.00906621
ENSG00000205056	LINC02397	22.1568	-1.75372	0.475675	0.000227082	0.00912345
ENSG00000128815	WDFY4	68.5993	-1.35911	0.369003	0.000230317	0.00923508
ENSG00000152207	CYSLTR2	115.103	-1.23952	0.337526	0.000240301	0.00959733
ENSG00000232629	HLA-DQB2	509.132	-0.972553	0.2648	0.000239926	0.00959733
ENSG00000107317	PTGDS	860.493	-1.34402	0.366316	0.000243483	0.0097052
ENSG00000179909	ZNF154	97.7936	-1.04923	0.286086	0.000244892	0.00974217
ENSG00000147408	CSGALNACT1	184.989	-0.92338	0.251873	0.000246317	0.00977961
ENSG00000121210	KIAA0922	372.023	-0.872836	0.238185	0.000247794	0.00979975
ENSG00000012660	ELOVL5	1066.24	-0.892925	0.243921	0.000251513	0.009835
ENSG00000133574	GIMAP4	810.085	-0.671611	0.183469	0.000251606	0.009835
ENSG00000143333	RGS16	103.298	-1.10545	0.301972	0.000251447	0.009835
ENSG00000145040	UCN2	9.70598	-2.12923	0.581552	0.000250942	0.009835
ENSG00000148848	ADAM12	123.249	-1.485	0.405454	0.000249709	0.009835
ENSG00000172349	IL16	1060.46	-0.840418	0.229696	0.000253364	0.00988464
ENSG00000130477	UNC13A	51.9898	-0.799032	0.218464	0.000254686	0.00991703
ENSG00000181617	FDCSP	205.788	-2.5618	0.700659	0.000255916	0.00994577
ENSG00000162645	GBP2	3399.31	-0.83604	0.228876	0.000259384	0.0100612
ENSG00000073464	CLCN4	153.276	-0.92118	0.252475	0.000263672	0.0102026
ENSG00000124772	CPNE5	753.885	-0.863242	0.236618	0.000264039	0.0102026
ENSG00000282651	AC247036.6	676.653	-1.07722	0.295323	0.000264698	0.0102085
ENSG00000204516	MICB	216.143	-0.976395	0.267952	0.000268519	0.0103165
ENSG00000160654	CD3G	139.617	-0.985891	0.270607	0.000269206	0.0103233
ENSG00000133466	C1QTNF6	493.804	-0.876401	0.240614	0.00027016	0.0103403
ENSG00000166750	SLFN5	1119.18	-0.983481	0.270097	0.000271354	0.0103663
ENSG00000164400	CSF2	12.3455	-2.82915	0.777192	0.000272405	0.0103869
ENSG00000069493	CLEC2D	266.69	-1.07163	0.294465	0.000273428	0.0104062
ENSG00000104972	LILRB1	466.578	-1.06053	0.291506	0.000274656	0.0104137
ENSG00000261884	AC040162.1	121.374	-0.584914	0.160759	0.000274286	0.0104137
ENSG00000135074	ADAM19	946.849	-0.7997	0.219936	0.000276834	0.0104663
ENSG00000168310	IRF2	1318.62	-0.316489	0.0870469	0.000277078	0.0104663
ENSG00000115009	CCL20	1772.06	-1.32989	0.365998	0.000279493	0.0105202
ENSG00000115935	WIPF1	1610.44	-0.912162	0.251039	0.000279545	0.0105202
ENSG00000139182	CLSTN3	931.654	-0.657845	0.181152	0.000281823	0.0105862
ENSG00000123338	NCKAP1L	1335.46	-0.93823	0.258444	0.000283087	0.0105943
ENSG00000140932	CMTM2	11.3276	-2.27125	0.625696	0.000283471	0.0105943
ENSG00000154217	PITPNC1	797.345	-0.723177	0.199232	0.000283611	0.0105943
ENSG00000141968	VAV1	568.488	-0.632786	0.174565	0.000289027	0.0107372
ENSG00000213903	LTB4R	128.894	-0.617715	0.170438	0.000289777	0.0107452
ENSG00000128284	APOL3	1248.48	-1.00193	0.276494	0.000290419	0.0107492
ENSG00000101307	SIRPB1	91.3703	-1.42825	0.394594	0.000295135	0.0108749
ENSG00000136048	DRAM1	836.238	-0.966824	0.267067	0.000294421	0.0108749
ENSG00000174007	CEP19	55.3449	-0.85691	0.236763	0.000295429	0.0108749
ENSG00000204792	LINC01291	6.94047	-2.77032	0.76624	0.000299796	0.0109956
ENSG00000211899	IGHM	45723.8	-1.16169	0.3213	0.000299644	0.0109956
ENSG00000114270	COL7A1	821.197	-1.06387	0.294779	0.000307329	0.0112109
ENSG00000165376	CLDN2	479.497	-2.05673	0.569826	0.000306913	0.0112109
ENSG00000225492	GBP1P1	45.3762	-1.55355	0.430452	0.000307261	0.0112109
ENSG00000089012	SIRPG	93.5906	-1.16061	0.321951	0.00031223	0.0112883
ENSG00000101846	STS	1966.35	-1.02337	0.283836	0.000311551	0.0112883
ENSG00000134489	HRH4	10.0819	-1.74879	0.485193	0.000312973	0.0112944
ENSG00000171777	RASGRP4	89.1035	-0.791825	0.219723	0.000313667	0.0112993
ENSG00000123838	C4BPA	495.487	-2.14788	0.596725	0.000318888	0.0114669
ENSG00000150551	LYPD1	25.4546	-1.82289	0.506658	0.000320835	0.011496
ENSG00000230836	LINC01293	22.211	-2.53394	0.704207	0.000320317	0.011496
ENSG00000226419	SLC16A1-AS1	30.9552	-1.07683	0.29945	0.000323127	0.0115372
ENSG00000181634	TNFSF15	224.743	-0.869935	0.241966	0.000324048	0.0115376
ENSG00000255398	HCAR3	110.34	-2.63231	0.732195	0.000324279	0.0115376
ENSG00000105205	CLC	173.58	-2.79537	0.777666	0.000324936	0.0115407
ENSG00000064886	CHI3L2	125.21	-2.48946	0.692766	0.000326259	0.0115673
ENSG00000151388	ADAMTS12	114.686	-1.32144	0.368129	0.000331167	0.0117003
ENSG00000140105	WARS	8153.14	-1.15094	0.320736	0.000332673	0.0117125
ENSG00000211945	IGHV1-18	7788.3	-1.17	0.326026	0.000332352	0.0117125
ENSG00000086548	CEACAM6	37458	-0.808166	0.225271	0.000333833	0.0117329
ENSG00000233695	GAS6-AS1	62.4653	-1.04841	0.292288	0.000334608	0.0117397
ENSG00000100060	MFNG	443.906	-0.691521	0.19288	0.000336773	0.0117437
ENSG00000134571	MYBPC3	6.13033	-1.85794	0.518147	0.000336116	0.0117437
ENSG00000166670	MMP10	303.593	-3.03033	0.845274	0.000337044	0.0117437
ENSG00000254087	LYN	1797.2	-0.801883	0.223655	0.00033662	0.0117437
ENSG00000147065	MSN	4739.02	-0.702819	0.196135	0.000339222	0.0117587
ENSG00000244575	IGKV1-27	3399.7	-1.16799	0.325935	0.000339005	0.0117587
ENSG00000122641	INHBA	113.685	-2.48676	0.694421	0.00034221	0.0118217
ENSG00000186810	CXCR3	146.059	-0.815644	0.227912	0.000345207	0.0118846
ENSG00000163220	S100A9	1385.5	-2.22572	0.622128	0.000346765	0.011918
ENSG00000129657	SEC14L1	3140.2	-0.567406	0.158654	0.000348404	0.011943
ENSG00000172575	RASGRP1	213.071	-1.10033	0.307685	0.000348675	0.011943
ENSG00000128594	LRRC4	29.2713	-1.25803	0.351939	0.000350805	0.0119842
ENSG00000142512	SIGLEC10	497.293	-0.943142	0.263895	0.000351657	0.0119842
ENSG00000226979	LTA	34.8364	-1.41377	0.39554	0.000351189	0.0119842
ENSG00000105369	CD79A	1562.38	-1.04329	0.292109	0.000354831	0.012072
ENSG00000122986	HVCN1	243.807	-1.12907	0.316304	0.00035759	0.0121454
ENSG00000170379	TCAF2	80.8796	-0.897764	0.251661	0.000360602	0.0122067
ENSG00000181631	P2RY13	254.182	-1.13949	0.31941	0.000360435	0.0122067
ENSG00000282639	AC247036.4	363.368	-1.4716	0.412637	0.000361998	0.0122335
ENSG00000133561	GIMAP6	815.606	-0.505702	0.141889	0.000365136	0.0123189
ENSG00000245648	AC022075.1	41.0708	-1.27078	0.356647	0.000366467	0.0123432
ENSG00000187862	TTC24	8.13949	-2.24343	0.63018	0.000370885	0.0124712
ENSG00000196511	TPK1	718.251	-0.822697	0.231244	0.000374112	0.012538
ENSG00000242574	HLA-DMB	2288.91	-0.962345	0.270474	0.000373705	0.012538
ENSG00000119681	LTBP2	695.517	-1.05004	0.29519	0.000374878	0.0125429
ENSG00000112096	SOD2	14139.4	-0.691525	0.194619	0.000380545	0.012628
ENSG00000118473	SGIP1	92.9114	-1.00785	0.283595	0.000379656	0.012628
ENSG00000169469	SPRR1B	14.0864	-3.03954	0.855433	0.000380547	0.012628
ENSG00000198821	CD247	288.264	-0.810511	0.22807	0.000379721	0.012628
ENSG00000116132	PRRX1	253.849	-1.48623	0.418358	0.000381546	0.0126404
ENSG00000179715	PCED1B	139.876	-1.10543	0.311316	0.000384033	0.0126812
ENSG00000135148	TRAFD1	1643.95	-0.575373	0.162089	0.000385617	0.0126921
ENSG00000188848	BEND4	34.4395	-1.11484	0.314108	0.000386348	0.0126955
ENSG00000265148	TSPOAP1-AS1	60.5725	-1.00866	0.285154	0.000404296	0.0132422
ENSG00000110777	POU2AF1	1554.42	-1.04321	0.295167	0.000408822	0.0133687
ENSG00000211951	IGHV2-26	1556.97	-1.25003	0.353899	0.00041218	0.0134371
ENSG00000011590	ZBTB32	23.4485	-1.48398	0.420299	0.000414336	0.0134619
ENSG00000211638	IGLV8-61	2104.35	-1.20274	0.341161	0.000422771	0.0136919
ENSG00000162745	OLFML2B	241.581	-1.03088	0.29251	0.000424679	0.0137317
ENSG00000205436	EXOC3L4	224.692	-0.78241	0.222049	0.000425732	0.0137438
ENSG00000135046	ANXA1	3790.59	-1.1833	0.336103	0.000430503	0.0137659
ENSG00000148926	ADM	1907.35	-0.884505	0.25123	0.000430424	0.0137659
ENSG00000171115	GIMAP8	532.304	-0.529846	0.150443	0.000428476	0.0137659
ENSG00000185386	MAPK11	137.25	-0.702062	0.199352	0.000428755	0.0137659
ENSG00000211637	IGLV4-69	2752.11	-1.25179	0.355522	0.000429962	0.0137659
ENSG00000266094	RASSF5	955.094	-0.931795	0.264764	0.000432622	0.0138039
ENSG00000100077	GRK3	440.896	-0.693533	0.197297	0.000439464	0.0138985
ENSG00000175489	LRRC25	234.491	-0.791792	0.225362	0.000442381	0.013949
ENSG00000182162	P2RY8	379.508	-1.11086	0.316181	0.000442443	0.013949
ENSG00000112149	CD83	379.522	-1.20822	0.3441	0.000446001	0.0140269
ENSG00000132003	ZSWIM4	165.899	-0.746984	0.212751	0.000446299	0.0140269
ENSG00000154451	GBP5	1093.09	-1.77487	0.506064	0.000452859	0.0141669
ENSG00000162398	LEXM	38.5192	-1.34747	0.384261	0.000453776	0.0141737
ENSG00000229644	NAMPTP1	183.581	-0.9491	0.270738	0.000455581	0.0142081
ENSG00000111537	IFNG	30.8988	-1.88602	0.538151	0.000457239	0.0142378
ENSG00000134061	CD180	346.933	-0.990305	0.282824	0.000462671	0.0143031
ENSG00000169442	CD52	725.844	-1.10141	0.314443	0.0004605	0.0143031
ENSG00000198774	RASSF9	41.4384	-0.89481	0.255551	0.000462665	0.0143031
ENSG00000211973	IGHV1-69	867.577	-1.23863	0.353757	0.000462876	0.0143031
ENSG00000187513	GJA4	118.661	-0.963834	0.275428	0.000466302	0.014387
ENSG00000145623	OSMR	781.686	-0.914399	0.261411	0.000468872	0.0144443
ENSG00000106948	AKNA	2056.59	-0.477441	0.136544	0.000471204	0.014494
ENSG00000213203	GIMAP1	298.451	-0.50486	0.144497	0.00047597	0.0146184
ENSG00000188389	PDCD1	68.9326	-1.39329	0.398888	0.000477714	0.0146497
ENSG00000171552	BCL2L1	2650.32	-0.413078	0.118309	0.000480299	0.0146844
ENSG00000180263	FGD6	1070.62	-0.656321	0.188043	0.000482527	0.0147302
ENSG00000096996	IL12RB1	275.925	-1.00225	0.287359	0.000487012	0.0148447
ENSG00000132182	NUP210	1315.45	-0.696798	0.199859	0.000489492	0.0148661
ENSG00000171049	FPR2	88.6622	-2.98021	0.854752	0.000489138	0.0148661
ENSG00000174125	TLR1	213.443	-0.936875	0.268737	0.000489921	0.0148661
ENSG00000141298	SSH2	1157.36	-0.463737	0.133069	0.000492264	0.0149056
ENSG00000213654	GPSM3	690.651	-0.730895	0.209766	0.000493348	0.0149056
ENSG00000277734	TRAC	595.497	-0.772114	0.221598	0.000493434	0.0149056
ENSG00000153012	LGI2	105.709	-1.44992	0.416291	0.000495938	0.0149365
ENSG00000211972	IGHV3-66	579.687	-1.24074	0.356843	0.000507074	0.0151814
ENSG00000167711	SERPINF2	133.058	-1.08279	0.311646	0.000511968	0.0152827
ENSG00000129474	AJUBA	117.17	-0.722313	0.207965	0.000514203	0.0152986
ENSG00000158089	GALNT14	18.2389	-1.45646	0.41934	0.000514247	0.0152986
ENSG00000173193	PARP14	4576.44	-0.945925	0.272369	0.000514772	0.0152986
ENSG00000143226	FCGR2A	952.05	-0.940025	0.271118	0.000525875	0.0156056
ENSG00000048471	SNX29	576.719	-0.52424	0.151334	0.000531943	0.0157164
ENSG00000153395	LPCAT1	2027.33	-1.05291	0.303934	0.000531707	0.0157164
ENSG00000101017	CD40	636.007	-0.987508	0.285129	0.000533451	0.015738
ENSG00000010295	IFFO1	318.319	-0.653757	0.188805	0.000534969	0.0157598
ENSG00000155629	PIK3AP1	1266.65	-0.619798	0.179156	0.000541098	0.0158891
ENSG00000169031	COL4A3	64.9955	-0.931095	0.26915	0.000541394	0.0158891
ENSG00000278869	BX539320.1	8.26965	-2.13405	0.616915	0.00054172	0.0158891
ENSG00000124508	BTN2A2	455.474	-0.821109	0.237591	0.000548296	0.0160355
ENSG00000157404	KIT	896.295	-0.707861	0.204804	0.000547685	0.0160355
ENSG00000168032	ENTPD3	94.3654	-0.839082	0.242902	0.000551507	0.0160989
ENSG00000172243	CLEC7A	310.188	-1.16871	0.338352	0.000552057	0.0160989
ENSG00000135365	PHF21A	587.636	-0.515147	0.149219	0.000555864	0.0161256
ENSG00000160255	ITGB2	2772.91	-1.05121	0.304452	0.00055478	0.0161256
ENSG00000163359	COL6A3	8554.42	-0.945884	0.273999	0.000556165	0.0161256
ENSG00000164520	RAET1E	15.1426	-1.18869	0.344544	0.000560505	0.0162282
ENSG00000128052	KDR	665.24	-0.603367	0.174979	0.000564279	0.0162451
ENSG00000224650	IGHV3-74	6881.13	-1.04885	0.304134	0.000563404	0.0162451
ENSG00000282508	LINC01002	123.986	-0.623729	0.18083	0.000562144	0.0162451
ENSG00000115956	PLEK	1127.11	-1.23963	0.359847	0.000571317	0.0163388
ENSG00000124243	BCAS4	88.6166	-0.821531	0.238446	0.000570326	0.0163388
ENSG00000168421	RHOH	269.022	-1.13266	0.328807	0.000571603	0.0163388
ENSG00000211734	TRBV5-1	29.0924	-1.27248	0.369383	0.000571332	0.0163388
ENSG00000172965	MIR4435-2HG	213.146	-0.794791	0.230935	0.000578239	0.0164819
ENSG00000090924	PLEKHG2	503.618	-0.871739	0.253338	0.000579538	0.0164956
ENSG00000106952	TNFSF8	75.891	-1.22263	0.355502	0.00058353	0.0165859
ENSG00000180353	HCLS1	1687.75	-0.870017	0.253025	0.000585025	0.016605
ENSG00000241351	IGKV3-11	16825.5	-1.15976	0.337337	0.000586043	0.0166106
ENSG00000150867	PIP4K2A	865.262	-0.587151	0.170932	0.000592546	0.0167474
ENSG00000109943	CRTAM	33.2304	-1.26774	0.369197	0.000595214	0.0167716
ENSG00000132274	TRIM22	1646.88	-0.960428	0.279793	0.000597742	0.0167716
ENSG00000166289	PLEKHF1	182.331	-0.77859	0.226838	0.000598362	0.0167716
ENSG00000074660	SCARF1	312.494	-0.638481	0.186045	0.000599462	0.0167791
ENSG00000121895	TMEM156	116.348	-1.09135	0.318099	0.000601655	0.0168086
ENSG00000182492	BGN	963.794	-1.23148	0.358965	0.00060218	0.0168086
ENSG00000068724	TTC7A	1576.03	-0.351912	0.102633	0.000606148	0.0168961
ENSG00000178562	CD28	213.292	-1.20918	0.352716	0.000607587	0.0169129
ENSG00000152804	HHEX	175.619	-0.791672	0.230981	0.000609327	0.016938
ENSG00000013016	EHD3	223.335	-0.968799	0.282796	0.000613016	0.0169473
ENSG00000074706	IPCEF1	97.1978	-0.865653	0.252679	0.000612756	0.0169473
ENSG00000250910	AC097467.3	8.51976	-2.66806	0.778772	0.000612591	0.0169473
ENSG00000113319	RASGRF2	222.875	-0.557976	0.163031	0.00062046	0.0170386
ENSG00000115221	ITGB6	1423.77	-0.863373	0.252203	0.000618607	0.0170386
ENSG00000137857	DUOX1	79.6676	-1.15145	0.336473	0.000621378	0.0170386
ENSG00000254109	RBPMS-AS1	6.65837	-2.31702	0.677011	0.000620653	0.0170386
ENSG00000261218	AC099524.1	8.04984	-1.8822	0.550424	0.00062728	0.0171307
ENSG00000125848	FLRT3	157.078	-1.11222	0.325761	0.00063967	0.0174219
ENSG00000134460	IL2RA	331.73	-1.10672	0.324299	0.00064331	0.017492
ENSG00000137757	CASP5	1739.63	-1.15898	0.339639	0.000643973	0.017492
ENSG00000010030	ETV7	429.561	-1.02595	0.300928	0.000651335	0.0176445
ENSG00000163817	SLC6A20	286.589	-1.76594	0.518516	0.000659794	0.0178259
ENSG00000204277	LINC01993	3.34409	-2.74214	0.805065	0.000658949	0.0178259
ENSG00000099985	OSM	82.9936	-2.50863	0.737279	0.000667593	0.0180125
ENSG00000070882	OSBPL3	728.175	-0.596389	0.175342	0.000670686	0.0180478
ENSG00000213658	LAT	24.4149	-0.910577	0.267714	0.00067064	0.0180478
ENSG00000029534	ANK1	70.862	-1.20217	0.353563	0.000673499	0.0180994
ENSG00000187116	LILRA5	128.516	-1.31008	0.385408	0.000675807	0.0181373
ENSG00000066294	CD84	572.749	-1.03007	0.303089	0.000677339	0.01815
ENSG00000140511	HAPLN3	347.388	-1.75546	0.51657	0.000678078	0.01815
ENSG00000205846	CLEC6A	17.9249	-2.48063	0.730106	0.000679732	0.0181702
ENSG00000198535	C2CD4A	245.721	-1.81298	0.534078	0.000687297	0.018324
ENSG00000165168	CYBB	2064.01	-1.03343	0.304511	0.000689474	0.0183337
ENSG00000105989	WNT2	13.6097	-4.72569	1.39282	0.000691611	0.0183663
ENSG00000015413	DPEP1	100.017	-1.17498	0.346454	0.000695244	0.0184144
ENSG00000092067	CEBPE	26.1123	-1.69737	0.500571	0.000696721	0.0184294
ENSG00000211938	IGHV3-7	13305.7	-1.14875	0.339247	0.000708707	0.0186975
ENSG00000117090	SLAMF1	233.478	-0.913842	0.269907	0.000709788	0.0187016
ENSG00000130813	C19orf66	831.989	-0.520843	0.153868	0.000711762	0.0187292
ENSG00000178927	C17orf62	2038.53	-0.485332	0.143478	0.000717956	0.0188676
ENSG00000198759	EGFL6	48.7478	-1.88466	0.557403	0.000721848	0.018904
ENSG00000198885	ITPRIPL1	61.8735	-0.931508	0.275487	0.000721398	0.018904
ENSG00000239713	APOBEC3G	383.745	-0.995385	0.294549	0.000726564	0.018946
ENSG00000268027	AC243960.1	46.2782	-1.12851	0.333906	0.000725582	0.018946
ENSG00000221947	XKR9	148.041	-1.1597	0.343256	0.00072875	0.0189541
ENSG00000146192	FGD2	478.704	-0.81852	0.2424	0.000733517	0.0190535
ENSG00000160117	ANKLE1	17.5235	-1.40367	0.415839	0.000736759	0.0191132
ENSG00000008083	JARID2	611.058	-0.345023	0.10229	0.000743533	0.0191904
ENSG00000096088	PGC	7.54844	-2.59531	0.769593	0.0007454	0.019214
ENSG00000023892	DEF6	629.591	-0.540038	0.160371	0.000758729	0.0195327
ENSG00000128512	DOCK4	499.982	-0.646975	0.192217	0.000763074	0.0196196
ENSG00000112137	PHACTR1	138.093	-0.949156	0.282126	0.000767379	0.0197052
ENSG00000167613	LAIR1	604.886	-0.608955	0.181026	0.000768476	0.0197083
ENSG00000100427	MLC1	13.0136	-1.38639	0.412368	0.000773737	0.019818
ENSG00000253882	AC099548.2	135.186	-0.708422	0.210895	0.000781902	0.0199766
ENSG00000185338	SOCS1	301.683	-1.40189	0.417394	0.000783156	0.0199833
ENSG00000101916	TLR8	262.132	-1.15545	0.344224	0.000788838	0.0200776
ENSG00000008516	MMP25	366.568	-0.907659	0.270458	0.000790749	0.0201009
ENSG00000119917	IFIT3	868.328	-1.05196	0.313565	0.000794144	0.0201366
ENSG00000211772	TRBC2	754.464	-0.851127	0.254133	0.000810636	0.0204521
ENSG00000019186	CYP24A1	7.78639	-3.38429	1.01084	0.000813944	0.02051
ENSG00000170819	BFSP2	12.3441	-1.85032	0.55277	0.000815844	0.0205322
ENSG00000109684	CLNK	26.4389	-1.04914	0.313867	0.000829864	0.0207689
ENSG00000162511	LAPTM5	4644.35	-0.752591	0.22507	0.000826368	0.0207689
ENSG00000163568	AIM2	109.459	-1.20117	0.359367	0.000830386	0.0207689
ENSG00000160883	HK3	259.373	-1.18362	0.354173	0.000832001	0.0207836
ENSG00000028137	TNFRSF1B	2224.72	-0.537644	0.160946	0.000836208	0.0208173
ENSG00000164485	IL22RA2	13.9423	-1.95806	0.586168	0.000836442	0.0208173
ENSG00000173706	HEG1	1396.76	-0.615227	0.184148	0.000834945	0.0208173
ENSG00000116497	S100PBP	477.968	-0.525103	0.157364	0.000847305	0.0209586
ENSG00000197872	FAM49A	347.004	-0.998539	0.299198	0.000845698	0.0209586
ENSG00000261618	AC083837.1	48.6501	-1.2443	0.372873	0.000846719	0.0209586
ENSG00000258227	CLEC5A	41.3553	-1.47424	0.441969	0.00085107	0.021026
ENSG00000185215	TNFAIP2	2117.92	-1.01817	0.305303	0.00085318	0.0210524
ENSG00000106991	ENG	2046.59	-0.60075	0.180162	0.00085456	0.0210607
ENSG00000211665	IGLV3-16	46.254	-1.49299	0.448681	0.000876262	0.0214647
ENSG00000142102	PGGHG	992.297	-0.440345	0.132397	0.000881157	0.0215064
ENSG00000117009	KMO	80.28	-1.32853	0.399663	0.000886928	0.0216212
ENSG00000169855	ROBO1	718.929	-0.844182	0.25409	0.000892543	0.0217057
ENSG00000261971	MMP25-AS1	136.813	-0.682925	0.205584	0.000894124	0.021718
ENSG00000279369	AC046185.3	50.4772	-1.10641	0.333134	0.000896249	0.0217435
ENSG00000162493	PDPN	511.27	-1.23702	0.372583	0.000899766	0.02176
ENSG00000198771	RCSD1	690.502	-0.647995	0.195179	0.000900161	0.02176
ENSG00000068650	ATP11A	878.028	-0.654617	0.197214	0.000902344	0.0217867
ENSG00000254750	CASP1P2	11.0108	-2.54351	0.766509	0.000905645	0.0218403
ENSG00000065413	ANKRD44	46.1213	-1.09452	0.33005	0.000912409	0.0219772
ENSG00000185245	GP1BA	21.9406	-1.68427	0.508017	0.000915162	0.0220173
ENSG00000187908	DMBT1	37323.7	-2.13527	0.644265	0.000918808	0.0220787
ENSG00000170989	S1PR1	395.218	-0.765874	0.231116	0.000920327	0.0220888
ENSG00000026950	BTN3A1	1762.28	-0.694423	0.209601	0.000922754	0.0220947
ENSG00000179344	HLA-DQB1	3859.08	-0.882144	0.266399	0.000928405	0.0221932
ENSG00000087266	SH3BP2	2151.82	-0.444451	0.134338	0.000938122	0.0223304
ENSG00000103653	CSK	2799.79	-0.319604	0.0965927	0.000937027	0.0223304
ENSG00000211799	TRAV19	10.9392	-1.29183	0.390448	0.00093768	0.0223304
ENSG00000109790	KLHL5	472.091	-0.975638	0.294981	0.000941456	0.0223571
ENSG00000092345	DAZL	5.65484	-3.58383	1.08381	0.000944037	0.0223658
ENSG00000111701	APOBEC1	122.577	-1.43242	0.433156	0.00094324	0.0223658
ENSG00000171681	ATF7IP	1386.11	-0.427765	0.129385	0.000945907	0.0223839
ENSG00000061273	HDAC7	1243.57	-0.544734	0.164869	0.000952997	0.0225253
ENSG00000143515	ATP8B2	810.288	-0.695121	0.21048	0.000958093	0.0226193
ENSG00000158477	CD1A	11.6044	-1.74745	0.529385	0.000963755	0.0226999
ENSG00000172322	CLEC12A	67.0174	-1.11691	0.338364	0.000963688	0.0226999
ENSG00000066405	CLDN18	17.6874	-1.7486	0.52985	0.00096622	0.0227315
ENSG00000135899	SP110	232.936	-0.787772	0.238791	0.000970287	0.0227635
ENSG00000224660	SH3BP5-AS1	177.81	-0.434859	0.131823	0.000970958	0.0227635
ENSG00000238133	MAP3K20-AS1	17.5496	-1.85435	0.562114	0.000970675	0.0227635
ENSG00000160185	UBASH3A	66.7983	-0.821269	0.249205	0.000982275	0.0230021
ENSG00000131196	NFATC1	220.677	-0.758751	0.230665	0.00100398	0.023456
ENSG00000231437	LINC01750	32.867	-1.82093	0.553526	0.001003	0.023456
ENSG00000183484	GPR132	182.22	-1.11712	0.33972	0.00100778	0.0235176
ENSG00000094755	GABRP	147.325	-1.32357	0.402892	0.00101919	0.0237016
ENSG00000176485	PLA2G16	370.719	-0.887669	0.270291	0.00102298	0.0237626
ENSG00000071246	VASH1	691.67	-0.666887	0.203252	0.00103407	0.0239102
ENSG00000089723	OTUB2	193.542	-0.666512	0.203131	0.0010337	0.0239102
ENSG00000110799	VWF	3030.34	-0.832472	0.253713	0.00103383	0.0239102
ENSG00000123684	LPGAT1	2885.65	-0.736619	0.224584	0.00103835	0.0239817
ENSG00000197249	SERPINA1	14742.4	-0.467387	0.142574	0.00104469	0.0241006
ENSG00000105287	PRKD2	1678.62	-0.328407	0.100288	0.00105797	0.0243792
ENSG00000205045	SLFN12L	51.0273	-1.03103	0.315081	0.00106683	0.0245554
ENSG00000007933	FMO3	25.6001	-1.56789	0.479541	0.00107709	0.0247092
ENSG00000179144	GIMAP7	464.265	-0.577157	0.176677	0.00108796	0.0249282
ENSG00000105808	RASA4	321.065	-0.436233	0.133577	0.00109163	0.0249667
ENSG00000147697	GSDMC	10.1187	-1.84366	0.56467	0.00109458	0.0249667
ENSG00000204257	HLA-DMA	2862.78	-0.799046	0.244685	0.00109227	0.0249667
ENSG00000240671	IGKV1-8	288.316	-1.06209	0.325272	0.00109371	0.0249667
ENSG00000128262	POM121L9P	22.5877	-1.17478	0.360009	0.00110167	0.0250548
ENSG00000180739	S1PR5	15.1171	-1.54851	0.474557	0.00110217	0.0250548
ENSG00000237604	AP001056.1	12.5605	-1.12715	0.345395	0.00110103	0.0250548
ENSG00000090339	ICAM1	1631.22	-1.08078	0.331305	0.00110562	0.025105
ENSG00000211666	IGLV2-14	11720	-1.14381	0.350681	0.0011075	0.0251194
ENSG00000164236	ANKRD33B	133.377	-0.771506	0.236608	0.00111142	0.0251802
ENSG00000118308	LRMP	651.179	-0.675617	0.207294	0.00111718	0.0252224
ENSG00000165071	TMEM71	81.7013	-0.825751	0.253339	0.00111619	0.0252224
ENSG00000213626	LBH	1028.18	-0.717094	0.220039	0.00111828	0.0252224
ENSG00000060558	GNA15	333.716	-1.05328	0.323299	0.00112231	0.0252465
ENSG00000125810	CD93	1684.62	-0.62544	0.191978	0.00112247	0.0252465
ENSG00000070190	DAPP1	612.901	-0.869525	0.267016	0.00112814	0.0253035
ENSG00000103222	ABCC1	1428.46	-0.572663	0.175841	0.00112715	0.0253035
ENSG00000161929	SCIMP	247.453	-1.19583	0.367364	0.00113325	0.0253901
ENSG00000172867	KRT2	11.0105	-1.66612	0.51192	0.00113528	0.0254074
ENSG00000180448	ARHGAP45	1592.52	-0.500518	0.153945	0.00114891	0.0256556
ENSG00000041982	TNC	2455.43	-0.789693	0.243133	0.00116225	0.0258678
ENSG00000083799	CYLD	1674.76	-0.612076	0.188447	0.00116219	0.0258678
ENSG00000115008	IL1A	88.9292	-2.03047	0.625616	0.00117221	0.0260606
ENSG00000283267	FAM237B	4.0877	-3.83788	1.1836	0.00118461	0.0262498
ENSG00000086300	SNX10	405.269	-1.27975	0.395326	0.00120704	0.0266796
ENSG00000258168	AC025569.1	21.6136	-1.15199	0.355882	0.00120797	0.0266796
ENSG00000273079	GRIN2B	26.1452	-1.04148	0.321782	0.00120962	0.0266869
ENSG00000181690	PLAG1	61.9584	-0.938339	0.289971	0.00121228	0.0267163
ENSG00000147251	DOCK11	497.625	-0.66503	0.205551	0.00121495	0.026746
ENSG00000259807	AC009093.1	6.56865	-2.2972	0.710683	0.00122761	0.0269661
ENSG00000179241	LDLRAD3	107.006	-0.983505	0.304326	0.00123034	0.0269967
ENSG00000090376	IRAK3	609.824	-0.784073	0.242711	0.00123581	0.0270627
ENSG00000171310	CHST11	508.071	-0.910917	0.282006	0.00123732	0.0270627
ENSG00000124391	IL17C	6.60721	-2.70796	0.838458	0.00123923	0.0270742
ENSG00000253522	MIR3142HG	141.879	-0.836062	0.258924	0.0012423	0.027112
ENSG00000146215	CRIP3	10.6591	-1.40898	0.43646	0.00124571	0.0271278
ENSG00000164379	FOXQ1	71.6128	-1.28868	0.399191	0.00124554	0.0271278
ENSG00000175065	DSG4	17.0408	-1.04704	0.324492	0.00125228	0.0272416
ENSG00000088882	CPXM1	359.669	-1.20574	0.374033	0.00126583	0.0274477
ENSG00000133789	SWAP70	1367.74	-0.687734	0.213448	0.00127291	0.0275125
ENSG00000160013	PTGIR	55.2601	-0.881565	0.273601	0.0012726	0.0275125
ENSG00000181215	C4orf50	4.07539	-3.18676	0.988869	0.0012702	0.0275125
ENSG00000115604	IL18R1	184.314	-0.770548	0.2392	0.00127589	0.0275373
ENSG00000196209	SIRPB2	83.0471	-1.00337	0.311493	0.00127678	0.0275373
ENSG00000100985	MMP9	1797.78	-1.88141	0.584286	0.00128185	0.0276173
ENSG00000010810	FYN	694.034	-0.64914	0.201629	0.00128424	0.0276391
ENSG00000066230	SLC9A3	2403.72	-1.14227	0.354946	0.00129021	0.0277058
ENSG00000129988	LBP	4.84455	-3.34167	1.03864	0.00129379	0.0277266
ENSG00000163638	ADAMTS9	496.095	-0.805638	0.25053	0.00130113	0.0278248
ENSG00000270472	IGHV3OR16-9	5.68939	-2.44881	0.76164	0.0013036	0.0278482
ENSG00000211792	TRAV14DV4	7.80972	-1.86786	0.581244	0.001311	0.0279473
ENSG00000174004	NRROS	150.517	-0.816166	0.254084	0.00131725	0.0280509
ENSG00000181652	ATG9B	9.66304	-1.5433	0.480581	0.00132127	0.0281069
ENSG00000132746	ALDH3B2	15.9713	-1.86428	0.580789	0.00132778	0.0282158
ENSG00000100351	GRAP2	197.33	-0.598912	0.186702	0.00133728	0.0283579
ENSG00000198879	SFMBT2	421.2	-0.727218	0.226685	0.00133637	0.0283579
ENSG00000241163	LINC00877	17.9373	-1.53042	0.477188	0.00134054	0.0283973
ENSG00000067057	PFKP	4239.04	-0.507032	0.15817	0.0013477	0.0284891
ENSG00000104903	LYL1	152.273	-0.864001	0.269791	0.00136248	0.0287714
ENSG00000102359	SRPX2	132.099	-0.835897	0.261148	0.00137019	0.0289041
ENSG00000065308	TRAM2	2620.87	-0.438175	0.137043	0.00138694	0.0291453
ENSG00000241717	VWFP1	13.9844	-1.34237	0.420068	0.00139541	0.0292227
ENSG00000091137	SLC26A4	53.8684	-1.71722	0.537779	0.00140719	0.029378
ENSG00000054967	RELT	317.201	-0.83215	0.260652	0.00141011	0.0294085
ENSG00000204577	LILRB3	152.787	-1.23367	0.386513	0.00141392	0.0294576
ENSG00000073861	TBX21	49.0218	-0.933021	0.292619	0.00143002	0.0297625
ENSG00000184374	COLEC10	9.7971	-1.36707	0.42885	0.00143382	0.0298049
ENSG00000125347	IRF1	6642.17	-0.657089	0.206258	0.00144375	0.0298773
ENSG00000132185	FCRLA	185.255	-1.3428	0.421519	0.00144438	0.0298773
ENSG00000185201	IFITM2	2053.89	-0.79156	0.248473	0.00144406	0.0298773
ENSG00000197535	MYO5A	685.931	-0.64551	0.202632	0.00144441	0.0298773
ENSG00000141068	KSR1	602.173	-0.525788	0.165103	0.00144956	0.0299532
ENSG00000080573	COL5A3	501.784	-0.858976	0.269856	0.00145714	0.0300791
ENSG00000198959	TGM2	5236.67	-1.74749	0.549341	0.00146734	0.0301663
ENSG00000238121	LINC00426	46.172	-0.90032	0.28302	0.00146708	0.0301663
ENSG00000281990	AC245369.4	89.4339	-1.56329	0.491394	0.001466	0.0301663
ENSG00000259772	AC012236.1	100.329	-1.03385	0.325276	0.00148101	0.0303546
ENSG00000179934	CCR8	14.6318	-1.91423	0.602406	0.00148482	0.0303561
ENSG00000234518	PTGES3P1	28.1879	-0.786049	0.247381	0.00148558	0.0303561
ENSG00000184454	NCMAP	113.702	-0.456882	0.143803	0.00148733	0.030361
ENSG00000168404	MLKL	1031.35	-0.419207	0.132005	0.00149476	0.0304512
ENSG00000188820	FAM26F	338.681	-1.20812	0.380413	0.00149416	0.0304512
ENSG00000100647	SUSD6	2954.22	-0.426729	0.134393	0.00149715	0.0304691
ENSG00000137868	STRA6	19.6468	-1.99598	0.628679	0.00149899	0.0304759
ENSG00000175115	PACS1	911.748	-0.64584	0.203611	0.00151424	0.0307252
ENSG00000106560	GIMAP2	390.592	-0.69165	0.218236	0.00152816	0.0309369
ENSG00000167286	CD3D	325.885	-0.892347	0.281581	0.00152931	0.0309369
ENSG00000175426	PCSK1	593.343	-0.909779	0.28712	0.00153155	0.0309511
ENSG00000187323	DCC	18.9498	-1.95014	0.615738	0.00153935	0.0310777
ENSG00000138496	PARP9	2747.87	-0.880581	0.278121	0.00154459	0.0311212
ENSG00000103888	CEMIP	621.864	-1.11325	0.351886	0.00155789	0.0313267
ENSG00000169896	ITGAM	300.476	-0.741727	0.234507	0.00156192	0.0313766
ENSG00000266709	AC005224.4	9.65318	-1.38589	0.438408	0.00157124	0.0315325
ENSG00000163032	VSNL1	265.084	-0.821898	0.260061	0.00157551	0.0315869
ENSG00000156219	ART3	61.7846	-1.25588	0.39776	0.001592	0.0318542
ENSG00000121594	CD80	74.0526	-1.25125	0.396419	0.00159736	0.0318983
ENSG00000180539	C9orf139	20.2278	-1.188	0.376372	0.00159698	0.0318983
ENSG00000261786	AC006058.1	24.3402	-1.54992	0.491349	0.00160814	0.0320186
ENSG00000111886	GABRR2	13.961	-1.13238	0.359089	0.00161339	0.0320599
ENSG00000134317	GRHL1	83.2771	-0.968697	0.307178	0.00161303	0.0320599
ENSG00000134013	LOXL2	968.27	-0.693751	0.220047	0.00161744	0.0321088
ENSG00000078900	TP73	42.0317	-1.11909	0.355073	0.00162316	0.0321592
ENSG00000211652	IGLV7-43	1767.44	-1.20723	0.383033	0.00162278	0.0321592
ENSG00000204304	PBX2	1552.14	-0.293856	0.0933278	0.00164031	0.0324601
ENSG00000233901	LINC01503	22.0209	-1.13983	0.36217	0.00164827	0.032561
ENSG00000136205	TNS3	3761.71	-0.269489	0.085637	0.00165022	0.0325677
ENSG00000281103	TRG-AS1	70.6935	-0.834438	0.265226	0.00165443	0.0325871
ENSG00000115461	IGFBP5	5789.45	-0.962823	0.306147	0.00166106	0.0326223
ENSG00000145416	2017-03-01	304.791	-0.776527	0.246949	0.00166379	0.0326442
ENSG00000111348	ARHGDIB	2805.51	-0.771493	0.245373	0.00166563	0.0326487
ENSG00000223806	LINC00114	40.1653	-1.40866	0.448127	0.00166973	0.0326973
ENSG00000184489	PTP4A3	376.146	-0.847103	0.269719	0.00168553	0.0329423
ENSG00000198829	SUCNR1	70.2031	-1.31687	0.41933	0.00168713	0.0329423
ENSG00000183741	CBX6	931.833	-0.498096	0.158672	0.00169436	0.0330514
ENSG00000172116	CD8B	80.3401	-0.517351	0.164919	0.00170692	0.0332644
ENSG00000115165	CYTIP	572.216	-1.01744	0.324381	0.00170943	0.0332813
ENSG00000232613	AC007386.2	26.116	-1.21532	0.387553	0.00171331	0.0333246
ENSG00000108244	KRT23	17.1891	-1.40051	0.446836	0.00172282	0.0334132
ENSG00000279286	AL133373.2	9.59405	-1.71226	0.546291	0.00172239	0.0334132
ENSG00000111335	OAS2	1064.82	-0.996314	0.317969	0.00172815	0.0334844
ENSG00000150681	RGS18	119.193	-0.874943	0.279307	0.00173297	0.0335455
ENSG00000213445	SIPA1	1014.57	-0.586394	0.187234	0.0017369	0.0335754
ENSG00000086730	LAT2	414.728	-0.719445	0.229838	0.00174667	0.0336496
ENSG00000182022	CHST15	738.514	-0.893432	0.285398	0.00174521	0.0336496
ENSG00000260244	AC104083.1	116.401	-0.970801	0.310088	0.00174373	0.0336496
ENSG00000230606	AC092683.1	114.26	-0.632419	0.202064	0.00174928	0.0336678
ENSG00000161798	AQP5	33.7742	-2.18054	0.696799	0.00175186	0.0336854
ENSG00000143390	RFX5	1316.81	-0.63174	0.20205	0.00176805	0.0339
ENSG00000157350	ST3GAL2	608.337	-0.721756	0.230803	0.00176508	0.0339
ENSG00000211947	IGHV3-21	10055.6	-1.1279	0.36073	0.00176769	0.0339
ENSG00000143702	CEP170	345.082	-0.661864	0.211784	0.00177689	0.0340371
ENSG00000187498	COL4A1	5416.76	-0.876954	0.280692	0.00178253	0.0341129
ENSG00000178764	ZHX2	615.127	-0.501623	0.160664	0.0017951	0.0343209
ENSG00000114019	AMOTL2	363.277	-0.49825	0.159662	0.00180447	0.0343212
ENSG00000131378	RFTN1	940.787	-0.688107	0.220441	0.00179932	0.0343212
ENSG00000136231	IGF2BP3	30.0412	-1.52175	0.487749	0.00180882	0.0343212
ENSG00000138378	STAT4	187.013	-0.792014	0.253876	0.0018104	0.0343212
ENSG00000156587	UBE2L6	2374.53	-0.947191	0.303483	0.00180196	0.0343212
ENSG00000185862	EVI2B	826.567	-0.952832	0.305294	0.00180223	0.0343212
ENSG00000188242	PP7080	2776.89	-0.716664	0.229622	0.00180203	0.0343212
ENSG00000275896	PRSS2	261.767	-2.09468	0.671433	0.00181021	0.0343212
ENSG00000184988	TMEM106A	280.821	-0.539448	0.172956	0.00181478	0.0343719
ENSG00000124549	BTN2A3P	113.025	-0.556043	0.178302	0.00181748	0.0343909
ENSG00000223350	IGLV9-49	328.714	-0.989534	0.317385	0.00182224	0.0344487
ENSG00000249806	AC139720.1	16.1632	-1.64025	0.526173	0.00182501	0.0344687
ENSG00000072121	ZFYVE26	1013.52	-0.350725	0.112542	0.00183079	0.0345175
ENSG00000100298	APOBEC3H	12.0221	-1.42358	0.456811	0.00183101	0.0345175
ENSG00000124496	TRERF1	406.185	-0.741547	0.238342	0.00186282	0.0349218
ENSG00000139890	REM2	19.2964	-0.935644	0.300776	0.00186603	0.0349496
ENSG00000134824	FADS2	1478.39	-1.73125	0.556607	0.00186857	0.0349648
ENSG00000211645	IGLV1-50	42.4751	-1.66818	0.536392	0.0018709	0.0349759
ENSG00000198502	HLA-DRB5	2083.63	-0.750157	0.241271	0.00187601	0.0350391
ENSG00000077684	JADE1	470.369	-0.426288	0.13715	0.0018824	0.035126
ENSG00000104998	IL27RA	360.096	-0.674615	0.217089	0.00188645	0.0351366
ENSG00000228427	AL590764.1	16.2135	-1.28295	0.412827	0.00188543	0.0351366
ENSG00000125510	OPRL1	32.7468	-0.994983	0.320486	0.00190533	0.035418
ENSG00000106415	GLCCI1	686.403	-0.983425	0.316887	0.00191315	0.0354705
ENSG00000049768	FOXP3	99.2436	-1.23386	0.397901	0.00192914	0.0357336
ENSG00000100385	IL2RB	534.5	-0.822818	0.265368	0.00193087	0.0357336
ENSG00000136872	ALDOB	859.905	-1.95352	0.630222	0.00193694	0.0358131
ENSG00000255587	RAB44	31.3233	-0.778028	0.251104	0.00194547	0.0359378
ENSG00000140937	CDH11	912.343	-0.644293	0.207988	0.00195005	0.0359652
ENSG00000067066	SP100	1658.55	-0.478573	0.154532	0.00195538	0.0359894
ENSG00000096968	JAK2	1086.21	-0.695879	0.224696	0.00195501	0.0359894
ENSG00000129451	KLK10	257.815	-2.22021	0.717323	0.00196721	0.036101
ENSG00000134470	IL15RA	537.675	-0.613255	0.198105	0.00196411	0.036101
ENSG00000166446	CDYL2	207.134	-0.804138	0.259824	0.00196859	0.036101
ENSG00000111199	TRPV4	35.4833	-0.937592	0.303012	0.00197321	0.0361528
ENSG00000088386	SLC15A1	316.031	-1.18449	0.382944	0.00198065	0.0361907
ENSG00000143119	CD53	1785.74	-0.910258	0.294685	0.0020089	0.0365746
ENSG00000128918	ALDH1A2	377.641	-2.09942	0.67976	0.0020119	0.0365767
ENSG00000111801	BTN3A3	1180.26	-0.734483	0.237939	0.00202291	0.0367305
ENSG00000065882	TBC1D1	1662.88	-0.310625	0.100728	0.00204376	0.0369818
ENSG00000110876	SELPLG	696.537	-0.83958	0.272349	0.00205109	0.0370193
ENSG00000244482	LILRA6	74.8152	-1.141	0.370137	0.00205164	0.0370193
ENSG00000129675	ARHGEF6	661.817	-0.720865	0.234036	0.00206902	0.0372332
ENSG00000150977	RILPL2	393.171	-0.669377	0.217305	0.00206751	0.0372332
ENSG00000144815	NXPE3	499.211	-0.948807	0.308312	0.00208795	0.0375069
ENSG00000230438	SERPINB9P1	36.5895	-1.0161	0.330416	0.00210358	0.037744
ENSG00000019991	HGF	312.892	-0.854274	0.277844	0.00210747	0.0377569
ENSG00000105374	NKG7	152.805	-0.727694	0.236799	0.00211883	0.0378598
ENSG00000100170	SLC5A1	2613.66	-0.499815	0.162693	0.00212531	0.0378751
ENSG00000211967	IGHV3-53	1408.06	-1.13739	0.370176	0.00212232	0.0378751
ENSG00000255571	MIR9-3HG	22.9127	-1.06735	0.347412	0.00212423	0.0378751
ENSG00000135472	FAIM2	159.472	-0.92514	0.301246	0.00213313	0.0379811
ENSG00000101986	ABCD1	508.325	-0.457744	0.149117	0.00214276	0.0379843
ENSG00000140090	SLC24A4	27.9631	-1.20729	0.393286	0.00214237	0.0379843
ENSG00000204287	HLA-DRA	30872.8	-0.900538	0.293363	0.00214271	0.0379843
ENSG00000211598	IGKV4-1	22787	-1.15836	0.377343	0.00214209	0.0379843
ENSG00000196549	MME	342.088	-1.20189	0.391789	0.00215711	0.0381725
ENSG00000113532	ST8SIA4	493.125	-0.688386	0.224417	0.00215902	0.0381729
ENSG00000135519	KCNH3	9.43003	-1.36319	0.444529	0.00216518	0.0382149
ENSG00000211639	IGLV4-60	252.723	-1.29515	0.422625	0.00218008	0.0384109
ENSG00000102096	PIM2	2363.17	-1.10962	0.362446	0.0022025	0.0387423
ENSG00000280832	GSEC	27.8775	-1.28769	0.420615	0.00220273	0.0387423
ENSG00000134242	PTPN22	251.353	-0.816645	0.266938	0.00221847	0.0389513
ENSG00000225138	SLC9A3-AS1	289.147	-0.50692	0.165758	0.00222679	0.0390297
ENSG00000042062	RIPOR3	257.461	-0.834379	0.272901	0.00223234	0.0390592
ENSG00000079215	SLC1A3	125.866	-1.33969	0.438249	0.00223627	0.0390603
ENSG00000211654	IGLV5-37	158.036	-2.13282	0.697678	0.00223541	0.0390603
ENSG00000181444	ZNF467	128.129	-0.71589	0.234256	0.002243	0.039144
ENSG00000214110	LDHAP4	120.693	-0.610798	0.199936	0.00225079	0.0392461
ENSG00000026508	CD44	5985.76	-0.600361	0.196597	0.00225988	0.0393707
ENSG00000105967	TFEC	284.681	-1.02491	0.335793	0.0022716	0.039539
ENSG00000004468	CD38	701.337	-1.47935	0.484951	0.00228451	0.0396629
ENSG00000166278	C2	1035.96	-0.840696	0.275755	0.00229827	0.0398538
ENSG00000211699	TRGV3	10.2647	-1.17725	0.386166	0.00229945	0.0398538
ENSG00000125730	C3	3930.98	-1.45259	0.47672	0.00231097	0.0399508
ENSG00000112541	PDE10A	58.7557	-0.778797	0.255635	0.00231512	0.0399883
ENSG00000065833	ME1	1366.15	-0.717733	0.235741	0.00233	0.0402109
ENSG00000086205	FOLH1	15.1641	-1.278	0.41985	0.0023351	0.0402645
ENSG00000172081	MOB3A	1314.28	-0.370525	0.12175	0.00233978	0.0403108
ENSG00000133985	TTC9	222.247	-1.02988	0.338612	0.00235418	0.0404899
ENSG00000153317	ASAP1	736.428	-0.598895	0.197072	0.00237391	0.0406841
ENSG00000230006	ANKRD36BP2	720.196	-0.92519	0.304588	0.00238539	0.040772
ENSG00000261371	PECAM1	4108.97	-0.66462	0.218816	0.00238672	0.040772
ENSG00000106852	LHX6	71.8064	-0.571968	0.188426	0.0024014	0.0409535
ENSG00000064687	ABCA7	776.25	-0.543935	0.179291	0.00241492	0.0411404
ENSG00000164342	TLR3	710.642	-0.719614	0.237222	0.00241732	0.0411404
ENSG00000154928	EPHB1	19.9145	-1.58236	0.522312	0.00244944	0.0414945
ENSG00000113088	GZMK	115	-0.966333	0.319207	0.00246755	0.0416946
ENSG00000088340	FER1L4	416.714	-1.1223	0.37088	0.00247784	0.0417985
ENSG00000198624	CCDC69	1267.17	-0.751139	0.248206	0.00247584	0.0417985
ENSG00000211728	TRBV5-6	6.6506	-1.71213	0.565878	0.00248128	0.0418217
ENSG00000107485	GATA3	50.0465	-0.802454	0.265424	0.00250042	0.0421091
ENSG00000122679	RAMP3	465.413	-0.678869	0.224722	0.00252008	0.0424048
ENSG00000180061	TMEM150B	224.022	-0.598676	0.198208	0.00252405	0.0424364
ENSG00000231925	TAPBP	6891.24	-0.45262	0.149904	0.0025328	0.0425482
ENSG00000133246	PRAM1	34.7569	-1.15813	0.383633	0.00253744	0.0425552
ENSG00000241860	AL627309.5	124.747	-0.93408	0.309484	0.00254294	0.0426121
ENSG00000081052	COL4A4	136.283	-0.907942	0.300866	0.00254646	0.0426358
ENSG00000169884	WNT10B	35.0069	-0.782764	0.259413	0.00254917	0.0426416
ENSG00000214402	LCNL1	13.1096	-1.56641	0.519158	0.00255103	0.0426416
ENSG00000114013	CD86	410.316	-0.84877	0.281384	0.00255791	0.0426509
ENSG00000166546	BEAN1	19.853	-2.20367	0.73055	0.00255747	0.0426509
ENSG00000239571	IGKV2D-30	25.3712	-1.48301	0.491623	0.00255655	0.0426509
ENSG00000163823	CCR1	370.445	-0.800449	0.265401	0.00256138	0.0426734
ENSG00000105835	NAMPT	6295.54	-0.815872	0.270616	0.00257088	0.0427964
ENSG00000204282	TNRC6C-AS1	336.227	-0.439601	0.145833	0.00257483	0.042827
ENSG00000282939	AC245088.2	33.2685	-1.19736	0.397318	0.00258163	0.0429047
ENSG00000211896	IGHG1	125888	-1.48855	0.494502	0.00261071	0.0433523
ENSG00000215244	AL137145.2	5.34452	-1.67804	0.557684	0.00262163	0.0434266
ENSG00000136960	ENPP2	1598.05	-0.726262	0.241426	0.00262779	0.0434931
ENSG00000143320	CRABP2	46.7111	-1.19475	0.398018	0.00268438	0.0441764
ENSG00000168062	BATF2	1609.32	-0.815121	0.271601	0.00268939	0.0442229
ENSG00000135636	DYSF	456.01	-0.767538	0.255808	0.00269589	0.0442937
ENSG00000189152	GRAPL	5.70136	-1.63963	0.546801	0.00271239	0.0444924
ENSG00000235531	MSC-AS1	78.9289	-0.625545	0.20866	0.00271831	0.0445173
ENSG00000154133	ROBO4	280.745	-0.528226	0.176226	0.00272256	0.044522
ENSG00000159871	LYPD5	268.089	-1.64776	0.549732	0.00272301	0.044522
ENSG00000101224	CDC25B	2174.89	-0.808182	0.269714	0.00273154	0.0446255
ENSG00000091129	NRCAM	72.1065	-1.07405	0.358603	0.00274364	0.0447508
ENSG00000139055	ERP27	42.5736	-0.966927	0.322921	0.0027506	0.0447783
ENSG00000205060	SLC35B4	378.378	-0.422025	0.140949	0.00275197	0.0447783
ENSG00000131370	SH3BP5	801.826	-0.544153	0.181797	0.0027607	0.0447803
ENSG00000166128	RAB8B	804.466	-0.718855	0.240165	0.00276096	0.0447803
ENSG00000167772	ANGPTL4	322.577	-1.80377	0.602515	0.00275594	0.0447803
ENSG00000025708	TYMP	3158.83	-0.919149	0.307221	0.00277321	0.044871
ENSG00000167634	NLRP7	48.5153	-1.39197	0.465336	0.00277775	0.0448726
ENSG00000276980	AC008760.2	6.73824	-2.42151	0.809458	0.00277593	0.0448726
ENSG00000133794	ARNTL	333.094	-0.443984	0.148439	0.00278056	0.0448821
ENSG00000073150	PANX2	7.25138	-1.66201	0.555719	0.00278308	0.0448868
ENSG00000090382	LYZ	31903.2	-0.827915	0.276939	0.00279418	0.044994
ENSG00000197977	ELOVL2	8.22512	-2.17572	0.727725	0.00279196	0.044994
ENSG00000173110	HSPA6	89.2663	-0.65147	0.217965	0.00280012	0.045019
ENSG00000139178	C1RL	1191.29	-0.40205	0.13457	0.00281108	0.0450866
ENSG00000173894	CBX2	74.392	-0.804302	0.269168	0.00280712	0.0450866
ENSG00000204983	PRSS1	6.80475	-2.50261	0.837952	0.00282112	0.0452117
ENSG00000148346	LCN2	17079.2	-1.51231	0.506692	0.00283888	0.0454279
ENSG00000162746	FCRLB	13.4361	-1.26963	0.425429	0.00284184	0.0454358
ENSG00000015568	RGPD5	4.81181	-1.71846	0.57588	0.00284452	0.0454427
ENSG00000132704	FCRL2	176.894	-0.912336	0.30586	0.00285571	0.0455853
ENSG00000188906	LRRK2	282.377	-1.17251	0.393497	0.00288504	0.0459085
ENSG00000204161	C10orf128	331.904	-0.607632	0.20402	0.00289854	0.0460147
ENSG00000101825	MXRA5	2337.78	-0.751892	0.252489	0.00290213	0.0460355
ENSG00000160999	SH2B2	151.113	-0.715636	0.240335	0.00290461	0.0460387
ENSG00000164308	ERAP2	2191.85	-0.781151	0.262367	0.00290783	0.0460536
ENSG00000163519	TRAT1	55.0618	-1.06769	0.359254	0.00295902	0.0467544
ENSG00000012223	LTF	370.442	-1.59225	0.536088	0.00297687	0.0469629
ENSG00000175318	GRAMD2	149.975	-1.15565	0.389091	0.00297683	0.0469629
ENSG00000099958	DERL3	2060.44	-0.955042	0.321656	0.00298632	0.0470753
ENSG00000106366	SERPINE1	495.662	-1.77186	0.597471	0.00302103	0.0473371
ENSG00000110395	CBL	1158.25	-0.478769	0.161414	0.00301604	0.0473371
ENSG00000211933	IGHV6-1	1691.79	-1.428	0.481472	0.00301797	0.0473371
ENSG00000066739	ATG2B	1178	-0.390187	0.131587	0.00302445	0.0473441
ENSG00000235505	AP002004.1	322.38	-0.761421	0.256813	0.00302792	0.0473616
ENSG00000253276	CCDC71L	859.198	-0.619284	0.209022	0.00304878	0.0476511
ENSG00000174804	FZD4	534.398	-0.413778	0.139671	0.00305132	0.0476538
ENSG00000115525	ST3GAL5	242.995	-0.704255	0.237744	0.0030541	0.0476604
ENSG00000131459	GFPT2	101.889	-0.971742	0.328112	0.00306027	0.0477198
ENSG00000162849	KIF26B	57.2999	-1.22594	0.414044	0.00306748	0.0477955
ENSG00000115232	ITGA4	838.51	-0.791842	0.267591	0.00308492	0.0479841
ENSG00000211956	IGHV4-34	2450.42	-1.61197	0.544819	0.00308908	0.0479841
ENSG00000283597	FAM169B	4.29161	-2.95352	0.998227	0.00308875	0.0479841
ENSG00000146021	KLHL3	189.294	-0.645839	0.218329	0.00309549	0.0480097
ENSG00000131142	CCL25	7.41544	-2.40391	0.813159	0.0031139	0.0481777
ENSG00000131401	NAPSB	310.814	-0.944189	0.319407	0.00311585	0.0481777
ENSG00000089692	LAG3	225.243	-0.823497	0.278678	0.00312653	0.0481982
ENSG00000110436	SLC1A2	19.0815	-1.28406	0.434535	0.00312646	0.0481982
ENSG00000268758	ADGRE4P	46.7847	-0.808492	0.273572	0.00312343	0.0481982
ENSG00000231105	AL031728.1	8.04933	-1.47071	0.49777	0.00313085	0.0482251
ENSG00000014257	ACPP	422.683	-0.72996	0.247108	0.00313671	0.0482419
ENSG00000135604	STX11	169.085	-1.12737	0.381748	0.00314523	0.048336
ENSG00000111679	PTPN6	1821.3	-0.473677	0.160446	0.00315467	0.0483906
ENSG00000114353	GNAI2	4125.93	-0.48271	0.163507	0.0031549	0.0483906
ENSG00000277481	PKD1L3	8.57142	-1.43091	0.484705	0.00315596	0.0483906
ENSG00000211625	IGKV3D-20	476.594	-1.71159	0.579853	0.00315959	0.0484095
ENSG00000027075	PRKCH	509.988	-0.525681	0.17815	0.00316981	0.0484926
ENSG00000175928	LRRN1	34.4472	-0.817511	0.277042	0.00316899	0.0484926
ENSG00000241839	PLEKHO2	819.603	-0.767619	0.260176	0.00317376	0.0485163
ENSG00000064012	CASP8	1393.38	-0.403723	0.13696	0.00320106	0.0488966
ENSG00000172932	ANKRD13D	553.9	-0.497393	0.16875	0.00320351	0.0488971
ENSG00000163644	PPM1K	488.833	-0.684823	0.232394	0.00321054	0.0489674
ENSG00000176160	HSF5	4.47375	-2.21896	0.753211	0.00321914	0.0490616
ENSG00000177464	GPR4	65.9034	-0.943975	0.320488	0.0032251	0.0491153
ENSG00000129048	ACKR4	108.327	-2.09392	0.711526	0.00325199	0.0494192
ENSG00000149970	CNKSR2	12.1452	-1.27411	0.432954	0.00325239	0.0494192
ENSG00000270426	AC099343.2	15.6527	-1.1682	0.397177	0.00326877	0.0495651
ENSG00000116793	PHTF1	343.604	-0.568409	0.193333	0.00328156	0.0496063
ENSG00000154783	FGD5	458.696	-0.403125	0.137113	0.00328111	0.0496063
ENSG00000175040	CHST2	489.213	-0.869778	0.295841	0.00328188	0.0496063
ENSG00000186407	CD300E	96.7373	-2.04307	0.694836	0.00327832	0.0496063
ENSG00000187688	TRPV2	392.533	-0.708961	0.241379	0.00331269	0.0499599
