# Supplementary material
Source: HighWire-hosted journal article supplement (https://gut.bmj.com/content/68/1/25)
Supplement: inline-supplementary-material-7 [file inline-supplementary-material-7.xls]

## Sheet: Sheet2
				VDZ 0h vs 14w				IFX 0h vs 14w
Names	total	ensemble ID	gene name	log2FoldChange	lfcSE	pvalue	padj	log2FoldChange	lfcSE	pvalue	padj
Overlap IFX + VDZ Remission	29	ENSG00000023445	BIRC3	-1.23228	0.264856	3.2769e-06	0.000556496	-0.861055	0.211375	4.62936e-05	0.0229547
		ENSG00000079215	SLC1A3	-1.33969	0.438249	0.00223627	0.0390603	-2.15923	0.427228	4.32544e-07	0.00122558
		ENSG00000101307	SIRPB1	-1.42825	0.394594	0.000295135	0.0108749	-1.04162	0.23089	6.44187e-06	0.00672464
		ENSG00000103313	MEFV	-1.58317	0.320585	7.87703e-07	0.000209751	-0.927932	0.238176	9.78005e-05	0.0372522
		ENSG00000103569	AQP9	-3.87968	0.835922	3.46393e-06	0.00056813	-2.69982	0.623884	1.50847e-05	0.0130082
		ENSG00000105967	TFEC	-1.02491	0.335793	0.0022716	0.039539	-0.609572	0.15906	0.000126933	0.0419598
		ENSG00000113749	HRH2	-1.25459	0.233101	7.35936e-08	4.0196e-05	-0.994621	0.230518	1.59804e-05	0.0132065
		ENSG00000115009	CCL20	-1.32989	0.365998	0.000279493	0.0105202	-1.24228	0.265148	2.79645e-06	0.00346656
		ENSG00000119535	CSF3R	-2.23665	0.50674	1.01569e-05	0.0011467	-1.09426	0.285146	0.000124267	0.0417747
		ENSG00000121594	CD80	-1.25125	0.396419	0.00159736	0.0318983	-1.04358	0.249473	2.87491e-05	0.017819
		ENSG00000134460	IL2RA	-1.10672	0.324299	0.00064331	0.017492	-1.25827	0.252457	6.22549e-07	0.00137196
		ENSG00000137673	MMP7	-4.74771	1.10997	1.89132e-05	0.00170356	-2.32451	0.469872	7.53209e-07	0.00149391
		ENSG00000143546	S100A8	-2.95226	0.665982	9.29583e-06	0.00108163	-1.84135	0.34375	8.47796e-08	0.000441937
		ENSG00000155629	PIK3AP1	-0.619798	0.179156	0.000541098	0.0158891	-0.501461	0.123036	4.58694e-05	0.0229547
		ENSG00000158125	XDH	-1.22285	0.188857	9.48092e-11	3.19333e-07	-0.657299	0.155931	2.4943e-05	0.0168754
		ENSG00000162747	FCGR3B	-3.10712	0.683754	5.51433e-06	0.000747914	-1.97901	0.402529	8.81342e-07	0.00158914
		ENSG00000163464	CXCR1	-4.09564	0.67525	1.31652e-09	2.66055e-06	-2.66318	0.687961	0.000108335	0.0383699
		ENSG00000163599	CTLA4	-1.78761	0.460931	0.000105206	0.00532858	-1.0098	0.243539	3.37793e-05	0.0197053
		ENSG00000163739	CXCL1	-3.18721	0.64313	7.20373e-07	0.000207144	-1.50242	0.381503	8.21142e-05	0.0339824
		ENSG00000164691	TAGAP	-1.33357	0.306127	1.32304e-05	0.00135037	-0.818248	0.176927	3.75016e-06	0.00437533
		ENSG00000166527	CLEC4D	-3.02621	0.815838	0.000207811	0.00864128	-3.62111	0.853558	2.21163e-05	0.0162465
		ENSG00000169429	CXCL8	-3.08047	0.75431	4.42997e-05	0.00294491	-1.90259	0.328018	6.62153e-09	0.000131331
		ENSG00000171049	FPR2	-2.98021	0.854752	0.000489138	0.0148661	-1.99837	0.525073	0.00014129	0.0443374
		ENSG00000171051	FPR1	-2.35463	0.577433	4.54741e-05	0.00300322	-1.40491	0.341892	3.97014e-05	0.0212821
		ENSG00000180871	CXCR2	-3.55999	0.472371	4.8304e-14	3.25392e-10	-1.56202	0.399885	9.37733e-05	0.0364686
		ENSG00000181631	P2RY13	-1.13949	0.31941	0.000360435	0.0122067	-0.754344	0.150188	5.09606e-07	0.00126344
		ENSG00000211654	IGLV5-37	-2.13282	0.697678	0.00223541	0.0390603	-1.18043	0.280293	2.53756e-05	0.0168754
		ENSG00000254087	LYN	-0.801883	0.223655	0.00033662	0.0117437	-0.470562	0.120203	9.05056e-05	0.0359017
		ENSG00000255398	HCAR3	-2.63231	0.732195	0.000324279	0.0115376	-2.07711	0.429441	1.31962e-06	0.00186952
IFX Remission	24	ENSG00000026652	AGPAT4	#N/A	#N/A	#N/A	#N/A	-0.776764	0.176643	1.09577e-05	0.0108668
		ENSG00000096060	FKBP5	#N/A	#N/A	#N/A	#N/A	-0.605093	0.152433	7.20055e-05	0.0310469
		ENSG00000105246	EBI3	#N/A	#N/A	#N/A	#N/A	-1.00047	0.238338	2.69665e-05	0.0172534
		ENSG00000109906	ZBTB16	#N/A	#N/A	#N/A	#N/A	-1.23689	0.282966	1.23582e-05	0.0116721
		ENSG00000110848	CD69	#N/A	#N/A	#N/A	#N/A	-0.744869	0.13409	2.77592e-08	0.000275288
		ENSG00000121933	TMIGD3	#N/A	#N/A	#N/A	#N/A	-1.34098	0.345796	0.000105347	0.0379899
		ENSG00000130707	ASS1	#N/A	#N/A	#N/A	#N/A	-0.735041	0.18908	0.000101299	0.0372522
		ENSG00000139572	GPR84	#N/A	#N/A	#N/A	#N/A	-1.92567	0.474774	4.99255e-05	0.0235767
		ENSG00000162695	SLC30A7	#N/A	#N/A	#N/A	#N/A	-0.232379	0.0573867	5.13607e-05	0.0236904
		ENSG00000163249	CCNYL1	#N/A	#N/A	#N/A	#N/A	-0.593445	0.139461	2.08801e-05	0.0159283
		ENSG00000165929	TC2N	#N/A	#N/A	#N/A	#N/A	-0.305	0.0792423	0.000118623	0.0409268
		ENSG00000166523	CLEC4E	#N/A	#N/A	#N/A	#N/A	-2.32906	0.538034	1.49904e-05	0.0130082
		ENSG00000166828	SCNN1G	#N/A	#N/A	#N/A	#N/A	-0.954261	0.23176	3.8309e-05	0.0211061
		ENSG00000173166	RAPH1	#N/A	#N/A	#N/A	#N/A	-0.496402	0.120401	3.74094e-05	0.0211061
		ENSG00000174718	KIAA1551	#N/A	#N/A	#N/A	#N/A	-0.494118	0.12338	6.20619e-05	0.0273541
		ENSG00000177807	KCNJ10	#N/A	#N/A	#N/A	#N/A	-1.79976	0.336554	8.91271e-08	0.000441937
		ENSG00000182782	HCAR2	#N/A	#N/A	#N/A	#N/A	-1.63027	0.399723	4.53294e-05	0.0229547
		ENSG00000225523	IGKV6D-21	#N/A	#N/A	#N/A	#N/A	-0.815043	0.173467	2.62003e-06	0.00346438
		ENSG00000260314	MRC1	#N/A	#N/A	#N/A	#N/A	-0.590051	0.153388	0.000119681	0.0409268
		ENSG00000275302	CCL4	#N/A	#N/A	#N/A	#N/A	-1.04574	0.199019	1.48442e-07	0.0004907
		ENSG00000276070	CCL4L2	#N/A	#N/A	#N/A	#N/A	-0.967449	0.25297	0.000131112	0.0426307
		ENSG00000276085	CCL3L1	#N/A	#N/A	#N/A	#N/A	-1.38459	0.328873	2.55249e-05	0.0168754
		ENSG00000277632	CCL3	#N/A	#N/A	#N/A	#N/A	-1.22305	0.25096	1.09654e-06	0.0018124
		ENSG00000279355	AGPAT4-IT1	#N/A	#N/A	#N/A	#N/A	-1.34726	0.335701	5.98828e-05	0.0269935
VDZ Remission	1045	ENSG00000182885	ADGRG3	-2.05845	0.243532	2.85151e-17	5.76261e-13	#N/A	#N/A	#N/A	#N/A
		ENSG00000274536	AL034397.3	-1.81474	0.223962	5.36677e-16	5.42286e-12	#N/A	#N/A	#N/A	#N/A
		ENSG00000007908	SELE	-2.91455	0.420802	4.32366e-12	2.18442e-08	#N/A	#N/A	#N/A	#N/A
		ENSG00000151651	ADAM8	-1.38844	0.213915	8.54948e-11	3.19333e-07	#N/A	#N/A	#N/A	#N/A
		ENSG00000188822	CNR2	-2.20975	0.343537	1.2566e-10	3.6278e-07	#N/A	#N/A	#N/A	#N/A
		ENSG00000175857	GAPT	-1.52131	0.239009	1.95201e-10	4.93101e-07	#N/A	#N/A	#N/A	#N/A
		ENSG00000280153	AC133065.6	-1.46401	0.231249	2.43723e-10	5.47266e-07	#N/A	#N/A	#N/A	#N/A
		ENSG00000141527	CARD14	-2.01536	0.333659	1.53935e-09	2.82807e-06	#N/A	#N/A	#N/A	#N/A
		ENSG00000183625	CCR3	-2.62176	0.435637	1.76347e-09	2.96984e-06	#N/A	#N/A	#N/A	#N/A
		ENSG00000112195	TREML2	-2.35721	0.395827	2.5983e-09	4.03915e-06	#N/A	#N/A	#N/A	#N/A
		ENSG00000083454	P2RX5	-2.06024	0.350235	4.04214e-09	5.83484e-06	#N/A	#N/A	#N/A	#N/A
		ENSG00000126353	CCR7	-2.11208	0.360643	4.72951e-09	6.37192e-06	#N/A	#N/A	#N/A	#N/A
		ENSG00000179583	CIITA	-1.80213	0.310546	6.51017e-09	8.22275e-06	#N/A	#N/A	#N/A	#N/A
		ENSG00000163534	FCRL1	-2.472	0.428201	7.78743e-09	9.25742e-06	#N/A	#N/A	#N/A	#N/A
		ENSG00000187912	CLEC17A	-2.54207	0.441119	8.27444e-09	9.28989e-06	#N/A	#N/A	#N/A	#N/A
		ENSG00000156510	HKDC1	-1.40608	0.24515	9.71646e-09	1.03347e-05	#N/A	#N/A	#N/A	#N/A
		ENSG00000128335	APOL2	-1.1868	0.207955	1.14968e-08	1.1617e-05	#N/A	#N/A	#N/A	#N/A
		ENSG00000099866	MADCAM1	-1.45186	0.257049	1.62145e-08	1.48945e-05	#N/A	#N/A	#N/A	#N/A
		ENSG00000111913	RIPOR2	-2.06229	0.365047	1.6102e-08	1.48945e-05	#N/A	#N/A	#N/A	#N/A
		ENSG00000257275	AL139020.1	-6.5886	1.16969	1.77314e-08	1.55797e-05	#N/A	#N/A	#N/A	#N/A
		ENSG00000100721	TCL1A	-4.96732	0.884792	1.97579e-08	1.6637e-05	#N/A	#N/A	#N/A	#N/A
		ENSG00000062038	CDH3	-2.30514	0.415019	2.78746e-08	2.18424e-05	#N/A	#N/A	#N/A	#N/A
		ENSG00000167656	LY6D	-3.92904	0.707569	2.81014e-08	2.18424e-05	#N/A	#N/A	#N/A	#N/A
		ENSG00000167767	KRT80	-2.7274	0.494794	3.54386e-08	2.65251e-05	#N/A	#N/A	#N/A	#N/A
		ENSG00000012124	CD22	-2.08895	0.382561	4.75008e-08	3.42837e-05	#N/A	#N/A	#N/A	#N/A
		ENSG00000188263	IL17REL	-2.85449	0.523571	4.98182e-08	3.47164e-05	#N/A	#N/A	#N/A	#N/A
		ENSG00000143851	PTPN7	-1.28007	0.2355	5.46255e-08	3.56106e-05	#N/A	#N/A	#N/A	#N/A
		ENSG00000028277	POU2F2	-1.32991	0.24698	7.2572e-08	4.0196e-05	#N/A	#N/A	#N/A	#N/A
		ENSG00000102962	CCL22	-2.1599	0.400882	7.12951e-08	4.0196e-05	#N/A	#N/A	#N/A	#N/A
		ENSG00000135480	KRT7	-2.15845	0.399109	6.36701e-08	4.0196e-05	#N/A	#N/A	#N/A	#N/A
		ENSG00000138623	SEMA7A	-1.5809	0.292791	6.68615e-08	4.0196e-05	#N/A	#N/A	#N/A	#N/A
		ENSG00000244682	FCGR2C	-1.17099	0.21701	6.81378e-08	4.0196e-05	#N/A	#N/A	#N/A	#N/A
		ENSG00000159958	TNFRSF13C	-1.84271	0.343782	8.31753e-08	4.42339e-05	#N/A	#N/A	#N/A	#N/A
		ENSG00000126262	FFAR2	-1.58646	0.296736	8.97332e-08	4.64979e-05	#N/A	#N/A	#N/A	#N/A
		ENSG00000086967	MYBPC2	-2.14907	0.40262	9.41194e-08	4.75515e-05	#N/A	#N/A	#N/A	#N/A
		ENSG00000169991	IFFO2	-0.868035	0.163667	1.13506e-07	5.59474e-05	#N/A	#N/A	#N/A	#N/A
		ENSG00000237945	LINC00649	-0.987861	0.186863	1.24643e-07	5.9974e-05	#N/A	#N/A	#N/A	#N/A
		ENSG00000188404	SELL	-2.15537	0.40859	1.32658e-07	6.2346e-05	#N/A	#N/A	#N/A	#N/A
		ENSG00000173535	TNFRSF10C	-2.05211	0.395026	2.04844e-07	9.40839e-05	#N/A	#N/A	#N/A	#N/A
		ENSG00000198286	CARD11	-1.33205	0.257253	2.24313e-07	0.000100737	#N/A	#N/A	#N/A	#N/A
		ENSG00000161405	IKZF3	-1.35259	0.263082	2.72817e-07	0.000117305	#N/A	#N/A	#N/A	#N/A
		ENSG00000177257	DEFB4B	-7.0031	1.36146	2.69209e-07	0.000117305	#N/A	#N/A	#N/A	#N/A
		ENSG00000103522	IL21R	-1.74403	0.33975	2.84737e-07	0.000118027	#N/A	#N/A	#N/A	#N/A
		ENSG00000177455	CD19	-2.06105	0.401582	2.86175e-07	0.000118027	#N/A	#N/A	#N/A	#N/A
		ENSG00000092929	UNC13D	-1.19794	0.233894	3.02721e-07	0.000119955	#N/A	#N/A	#N/A	#N/A
		ENSG00000172023	REG1B	-4.84217	0.944771	2.97182e-07	0.000119955	#N/A	#N/A	#N/A	#N/A
		ENSG00000153064	BANK1	-1.95468	0.382737	3.27128e-07	0.000127133	#N/A	#N/A	#N/A	#N/A
		ENSG00000159339	PADI4	-2.6104	0.513232	3.65317e-07	0.000139296	#N/A	#N/A	#N/A	#N/A
		ENSG00000124602	UNC5CL	-1.56849	0.309811	4.13284e-07	0.000151184	#N/A	#N/A	#N/A	#N/A
		ENSG00000167895	TMC8	-1.09583	0.216385	4.09961e-07	0.000151184	#N/A	#N/A	#N/A	#N/A
		ENSG00000203710	CR1	-1.804	0.356511	4.18937e-07	0.000151184	#N/A	#N/A	#N/A	#N/A
		ENSG00000105639	JAK3	-1.42044	0.280902	4.26547e-07	0.000151229	#N/A	#N/A	#N/A	#N/A
		ENSG00000124203	ZNF831	-1.41594	0.280416	4.43179e-07	0.000152958	#N/A	#N/A	#N/A	#N/A
		ENSG00000168918	INPP5D	-0.916557	0.18157	4.46561e-07	0.000152958	#N/A	#N/A	#N/A	#N/A
		ENSG00000148735	PLEKHS1	-1.73291	0.344098	4.75148e-07	0.000154875	#N/A	#N/A	#N/A	#N/A
		ENSG00000173868	PHOSPHO1	-2.82742	0.561097	4.67724e-07	0.000154875	#N/A	#N/A	#N/A	#N/A
		ENSG00000198106	AC025279.1	-2.21133	0.439005	4.72544e-07	0.000154875	#N/A	#N/A	#N/A	#N/A
		ENSG00000198785	GRIN3A	-1.92992	0.383634	4.88882e-07	0.000156822	#N/A	#N/A	#N/A	#N/A
		ENSG00000173762	CD7	-0.739968	0.147452	5.2116e-07	0.000164564	#N/A	#N/A	#N/A	#N/A
		ENSG00000173432	SAA1	-4.16354	0.835201	6.1937e-07	0.000192567	#N/A	#N/A	#N/A	#N/A
		ENSG00000124256	ZBP1	-1.61158	0.323764	6.43647e-07	0.000197083	#N/A	#N/A	#N/A	#N/A
		ENSG00000228526	MIR34AHG	-0.979866	0.19716	6.69838e-07	0.000202041	#N/A	#N/A	#N/A	#N/A
		ENSG00000127311	HELB	-0.735646	0.148112	6.80525e-07	0.000202246	#N/A	#N/A	#N/A	#N/A
		ENSG00000156234	CXCL13	-3.2235	0.650712	7.27756e-07	0.000207144	#N/A	#N/A	#N/A	#N/A
		ENSG00000171608	PIK3CD	-1.20992	0.244089	7.16311e-07	0.000207144	#N/A	#N/A	#N/A	#N/A
		ENSG00000167483	FAM129C	-2.22154	0.44922	7.60133e-07	0.000209751	#N/A	#N/A	#N/A	#N/A
		ENSG00000175155	YPEL2	-0.919829	0.186119	7.72676e-07	0.000209751	#N/A	#N/A	#N/A	#N/A
		ENSG00000196329	GIMAP5	-0.929879	0.188307	7.88812e-07	0.000209751	#N/A	#N/A	#N/A	#N/A
		ENSG00000124875	CXCL6	-3.31773	0.673067	8.25347e-07	0.000213839	#N/A	#N/A	#N/A	#N/A
		ENSG00000265206	AC004687.1	-1.37758	0.279373	8.18173e-07	0.000213839	#N/A	#N/A	#N/A	#N/A
		ENSG00000123329	ARHGAP9	-1.00822	0.204676	8.39604e-07	0.000214779	#N/A	#N/A	#N/A	#N/A
		ENSG00000100003	SEC14L2	-1.2669	0.258125	9.19576e-07	0.000232131	#N/A	#N/A	#N/A	#N/A
		ENSG00000146112	PPP1R18	-1.02254	0.208486	9.36265e-07	0.000232131	#N/A	#N/A	#N/A	#N/A
		ENSG00000151023	ENKUR	-2.33512	0.476224	9.41893e-07	0.000232131	#N/A	#N/A	#N/A	#N/A
		ENSG00000079263	SP140	-1.50965	0.308188	9.65771e-07	0.000235148	#N/A	#N/A	#N/A	#N/A
		ENSG00000093134	VNN3	-2.90359	0.593711	1.00542e-06	0.000240605	#N/A	#N/A	#N/A	#N/A
		ENSG00000105352	CEACAM4	-2.91456	0.596111	1.012e-06	0.000240605	#N/A	#N/A	#N/A	#N/A
		ENSG00000119698	PPP4R4	-2.66961	0.546558	1.03738e-06	0.000243773	#N/A	#N/A	#N/A	#N/A
		ENSG00000134827	TCN1	-3.918	0.80312	1.06908e-06	0.000248335	#N/A	#N/A	#N/A	#N/A
		ENSG00000072818	ACAP1	-1.09931	0.226518	1.21551e-06	0.00027914	#N/A	#N/A	#N/A	#N/A
		ENSG00000100078	PLA2G3	-2.75053	0.568989	1.33768e-06	0.000303744	#N/A	#N/A	#N/A	#N/A
		ENSG00000120217	CD274	-1.70412	0.353348	1.41579e-06	0.000317907	#N/A	#N/A	#N/A	#N/A
		ENSG00000163508	EOMES	-1.18011	0.245895	1.59257e-06	0.000352765	#N/A	#N/A	#N/A	#N/A
		ENSG00000185811	IKZF1	-1.19612	0.249318	1.60594e-06	0.000352765	#N/A	#N/A	#N/A	#N/A
		ENSG00000135144	DTX1	-1.46214	0.305108	1.64948e-06	0.000358435	#N/A	#N/A	#N/A	#N/A
		ENSG00000160856	FCRL3	-1.83221	0.383293	1.75134e-06	0.000376519	#N/A	#N/A	#N/A	#N/A
		ENSG00000155849	ELMO1	-0.753047	0.157881	1.84496e-06	0.000388384	#N/A	#N/A	#N/A	#N/A
		ENSG00000197471	SPN	-1.08758	0.22795	1.83197e-06	0.000388384	#N/A	#N/A	#N/A	#N/A
		ENSG00000050730	TNIP3	-3.91832	0.822502	1.89889e-06	0.000389825	#N/A	#N/A	#N/A	#N/A
		ENSG00000126882	FAM78A	-1.03618	0.217537	1.90527e-06	0.000389825	#N/A	#N/A	#N/A	#N/A
		ENSG00000198734	F5	-0.922191	0.193626	1.90968e-06	0.000389825	#N/A	#N/A	#N/A	#N/A
		ENSG00000272636	DOC2B	-1.86808	0.392487	1.93983e-06	0.000392021	#N/A	#N/A	#N/A	#N/A
		ENSG00000104814	MAP4K1	-1.18111	0.248467	1.99854e-06	0.000396462	#N/A	#N/A	#N/A	#N/A
		ENSG00000122122	SASH3	-1.17027	0.2462	2.00105e-06	0.000396462	#N/A	#N/A	#N/A	#N/A
		ENSG00000148965	SAA4	-3.67193	0.77354	2.06537e-06	0.000405234	#N/A	#N/A	#N/A	#N/A
		ENSG00000179869	ABCA13	-1.30214	0.275912	2.36536e-06	0.00045963	#N/A	#N/A	#N/A	#N/A
		ENSG00000013374	NUB1	-0.51558	0.1094	2.44347e-06	0.00046415	#N/A	#N/A	#N/A	#N/A
		ENSG00000128578	STRIP2	-1.84025	0.390734	2.48049e-06	0.00046415	#N/A	#N/A	#N/A	#N/A
		ENSG00000211942	IGHV3-13	-1.69526	0.359547	2.41725e-06	0.00046415	#N/A	#N/A	#N/A	#N/A
		ENSG00000104974	LILRA1	-1.90671	0.405322	2.54865e-06	0.00047253	#N/A	#N/A	#N/A	#N/A
		ENSG00000115085	ZAP70	-1.03424	0.219999	2.58767e-06	0.000475402	#N/A	#N/A	#N/A	#N/A
		ENSG00000197705	KLHL14	-2.24385	0.477649	2.63114e-06	0.000479034	#N/A	#N/A	#N/A	#N/A
		ENSG00000102879	CORO1A	-1.16742	0.24968	2.92994e-06	0.000519396	#N/A	#N/A	#N/A	#N/A
		ENSG00000158481	CD1C	-1.66319	0.355621	2.9131e-06	0.000519396	#N/A	#N/A	#N/A	#N/A
		ENSG00000171711	DEFB4A	-6.77447	1.44797	2.88823e-06	0.000519396	#N/A	#N/A	#N/A	#N/A
		ENSG00000104921	FCER2	-1.95467	0.418887	3.06616e-06	0.000538818	#N/A	#N/A	#N/A	#N/A
		ENSG00000128438	TBC1D27	-1.08271	0.232545	3.22512e-06	0.000552343	#N/A	#N/A	#N/A	#N/A
		ENSG00000225783	MIAT	-1.43277	0.307529	3.17757e-06	0.000552343	#N/A	#N/A	#N/A	#N/A
		ENSG00000271856	LINC01215	-2.28675	0.491084	3.21566e-06	0.000552343	#N/A	#N/A	#N/A	#N/A
		ENSG00000012779	ALOX5	-0.899199	0.193774	3.47664e-06	0.00056813	#N/A	#N/A	#N/A	#N/A
		ENSG00000137841	PLCB2	-0.720512	0.155286	3.48598e-06	0.00056813	#N/A	#N/A	#N/A	#N/A
		ENSG00000168955	TM4SF20	-1.61435	0.347796	3.45629e-06	0.00056813	#N/A	#N/A	#N/A	#N/A
		ENSG00000187764	SEMA4D	-0.810789	0.175083	3.64105e-06	0.000588657	#N/A	#N/A	#N/A	#N/A
		ENSG00000124102	PI3	-1.74555	0.377393	3.74095e-06	0.000592853	#N/A	#N/A	#N/A	#N/A
		ENSG00000127152	BCL11B	-0.731013	0.15811	3.77414e-06	0.000592853	#N/A	#N/A	#N/A	#N/A
		ENSG00000177494	ZBED2	-2.85803	0.618234	3.78435e-06	0.000592853	#N/A	#N/A	#N/A	#N/A
		ENSG00000257335	MGAM	-1.66706	0.360393	3.73398e-06	0.000592853	#N/A	#N/A	#N/A	#N/A
		ENSG00000161791	FMNL3	-0.762971	0.16517	3.84998e-06	0.000598495	#N/A	#N/A	#N/A	#N/A
		ENSG00000123405	NFE2	-2.33519	0.505896	3.91303e-06	0.00060238	#N/A	#N/A	#N/A	#N/A
		ENSG00000186431	FCAR	-3.17894	0.688855	3.93459e-06	0.00060238	#N/A	#N/A	#N/A	#N/A
		ENSG00000131355	ADGRE3	-1.60756	0.349117	4.13193e-06	0.000623151	#N/A	#N/A	#N/A	#N/A
		ENSG00000186517	ARHGAP30	-1.10424	0.239745	4.10712e-06	0.000623151	#N/A	#N/A	#N/A	#N/A
		ENSG00000166840	GLYATL1	-2.08996	0.454056	4.16739e-06	0.000623842	#N/A	#N/A	#N/A	#N/A
		ENSG00000154016	GRAP	-1.23797	0.269737	4.4424e-06	0.000650555	#N/A	#N/A	#N/A	#N/A
		ENSG00000174837	ADGRE1	-1.23619	0.269267	4.41234e-06	0.000650555	#N/A	#N/A	#N/A	#N/A
		ENSG00000255071	SAA2-SAA4	-5.346	1.16475	4.43591e-06	0.000650555	#N/A	#N/A	#N/A	#N/A
		ENSG00000007171	NOS2	-2.61071	0.569374	4.53494e-06	0.000659329	#N/A	#N/A	#N/A	#N/A
		ENSG00000125735	TNFSF14	-1.00294	0.21887	4.59735e-06	0.000663628	#N/A	#N/A	#N/A	#N/A
		ENSG00000134339	SAA2	-3.78797	0.827223	4.66904e-06	0.000669196	#N/A	#N/A	#N/A	#N/A
		ENSG00000009790	TRAF3IP3	-1.09704	0.24045	5.05598e-06	0.00071452	#N/A	#N/A	#N/A	#N/A
		ENSG00000161905	ALOX15	-2.10225	0.460937	5.09555e-06	0.00071511	#N/A	#N/A	#N/A	#N/A
		ENSG00000105122	RASAL3	-0.911018	0.199881	5.16894e-06	0.000715473	#N/A	#N/A	#N/A	#N/A
		ENSG00000123843	C4BPB	-2.28863	0.502041	5.14809e-06	0.000715473	#N/A	#N/A	#N/A	#N/A
		ENSG00000039560	RAI14	-0.651743	0.143049	5.21139e-06	0.000716443	#N/A	#N/A	#N/A	#N/A
		ENSG00000197057	DTHD1	-1.96255	0.431257	5.34486e-06	0.000729827	#N/A	#N/A	#N/A	#N/A
		ENSG00000166428	PLD4	-0.885888	0.19522	5.68198e-06	0.000765514	#N/A	#N/A	#N/A	#N/A
		ENSG00000137101	CD72	-1.86645	0.411696	5.79992e-06	0.000776229	#N/A	#N/A	#N/A	#N/A
		ENSG00000138075	ABCG5	-1.94781	0.429993	5.90227e-06	0.000779601	#N/A	#N/A	#N/A	#N/A
		ENSG00000174175	SELP	-1.50791	0.332856	5.8925e-06	0.000779601	#N/A	#N/A	#N/A	#N/A
		ENSG00000136286	MYO1G	-0.932363	0.206084	6.06277e-06	0.0007956	#N/A	#N/A	#N/A	#N/A
		ENSG00000211892	IGHG4	-1.57112	0.347448	6.1292e-06	0.000799128	#N/A	#N/A	#N/A	#N/A
		ENSG00000189068	VSTM1	-1.93834	0.429478	6.38412e-06	0.000821763	#N/A	#N/A	#N/A	#N/A
		ENSG00000189120	SP6	-1.197	0.265719	6.64508e-06	0.000849939	#N/A	#N/A	#N/A	#N/A
		ENSG00000167984	NLRC3	-1.00514	0.223425	6.83448e-06	0.000868666	#N/A	#N/A	#N/A	#N/A
		ENSG00000106789	CORO2A	-0.635769	0.141455	6.97385e-06	0.000879198	#N/A	#N/A	#N/A	#N/A
		ENSG00000184922	FMNL1	-1.05677	0.235174	7.00435e-06	0.000879198	#N/A	#N/A	#N/A	#N/A
		ENSG00000213886	UBD	-2.62176	0.584778	7.34849e-06	0.000916702	#N/A	#N/A	#N/A	#N/A
		ENSG00000174885	NLRP6	-1.49791	0.334275	7.42661e-06	0.000920763	#N/A	#N/A	#N/A	#N/A
		ENSG00000163734	CXCL3	-2.51944	0.562428	7.47877e-06	0.000921576	#N/A	#N/A	#N/A	#N/A
		ENSG00000268104	SLC6A14	-3.10092	0.692454	7.52879e-06	0.000922117	#N/A	#N/A	#N/A	#N/A
		ENSG00000013725	CD6	-1.03056	0.230438	7.74235e-06	0.000942561	#N/A	#N/A	#N/A	#N/A
		ENSG00000156738	MS4A1	-2.72555	0.611289	8.24604e-06	0.000981472	#N/A	#N/A	#N/A	#N/A
		ENSG00000171700	RGS19	-0.998108	0.223791	8.19572e-06	0.000981472	#N/A	#N/A	#N/A	#N/A
		ENSG00000175463	TBC1D10C	-1.09191	0.244866	8.22621e-06	0.000981472	#N/A	#N/A	#N/A	#N/A
		ENSG00000198796	ALPK2	-2.26279	0.50753	8.25624e-06	0.000981472	#N/A	#N/A	#N/A	#N/A
		ENSG00000136573	BLK	-1.47422	0.330879	8.37158e-06	0.000989364	#N/A	#N/A	#N/A	#N/A
		ENSG00000130234	ACE2	-1.06437	0.239151	8.56155e-06	0.00100593	#N/A	#N/A	#N/A	#N/A
		ENSG00000115386	REG1A	-4.70614	1.06173	9.3129e-06	0.00108163	#N/A	#N/A	#N/A	#N/A
		ENSG00000081041	CXCL2	-2.47513	0.559199	9.59012e-06	0.00110747	#N/A	#N/A	#N/A	#N/A
		ENSG00000119922	IFIT2	-0.953243	0.21555	9.76188e-06	0.0011209	#N/A	#N/A	#N/A	#N/A
		ENSG00000185404	SP140L	-0.616906	0.139537	9.82081e-06	0.00112129	#N/A	#N/A	#N/A	#N/A
		ENSG00000110944	IL23A	-2.43823	0.551855	9.95082e-06	0.00112975	#N/A	#N/A	#N/A	#N/A
		ENSG00000265107	GJA5	-1.29223	0.293092	1.03873e-05	0.00116621	#N/A	#N/A	#N/A	#N/A
		ENSG00000233355	CHRM3-AS2	-1.6017	0.363712	1.06386e-05	0.00118781	#N/A	#N/A	#N/A	#N/A
		ENSG00000182866	LCK	-0.99383	0.225884	1.08388e-05	0.00120352	#N/A	#N/A	#N/A	#N/A
		ENSG00000167202	TBC1D2B	-0.547971	0.124653	1.10273e-05	0.00121114	#N/A	#N/A	#N/A	#N/A
		ENSG00000225217	HSPA7	-0.854678	0.194413	1.10163e-05	0.00121114	#N/A	#N/A	#N/A	#N/A
		ENSG00000116017	ARID3A	-0.928663	0.211467	1.12553e-05	0.00122951	#N/A	#N/A	#N/A	#N/A
		ENSG00000116824	CD2	-1.08901	0.248183	1.14444e-05	0.00124344	#N/A	#N/A	#N/A	#N/A
		ENSG00000174123	TLR10	-1.81697	0.414971	1.19468e-05	0.00128422	#N/A	#N/A	#N/A	#N/A
		ENSG00000105339	DENND3	-0.634387	0.145121	1.23433e-05	0.00131982	#N/A	#N/A	#N/A	#N/A
		ENSG00000008513	ST3GAL1	-1.27386	0.291752	1.26406e-05	0.00132567	#N/A	#N/A	#N/A	#N/A
		ENSG00000151948	GLT1D1	-2.58087	0.590946	1.25764e-05	0.00132567	#N/A	#N/A	#N/A	#N/A
		ENSG00000163563	MNDA	-1.56724	0.358973	1.26604e-05	0.00132567	#N/A	#N/A	#N/A	#N/A
		ENSG00000253686	LINC01484	-2.90775	0.665777	1.257e-05	0.00132567	#N/A	#N/A	#N/A	#N/A
		ENSG00000005844	ITGAL	-1.01775	0.233388	1.29605e-05	0.00134449	#N/A	#N/A	#N/A	#N/A
		ENSG00000134516	DOCK2	-0.984539	0.225783	1.29732e-05	0.00134449	#N/A	#N/A	#N/A	#N/A
		ENSG00000184221	OLIG1	-2.45975	0.564272	1.30563e-05	0.00134619	#N/A	#N/A	#N/A	#N/A
		ENSG00000283652	WDFY4	-1.68996	0.387894	1.31999e-05	0.00135037	#N/A	#N/A	#N/A	#N/A
		ENSG00000173200	PARP15	-1.40993	0.323781	1.33331e-05	0.00135401	#N/A	#N/A	#N/A	#N/A
		ENSG00000000938	FGR	-1.50087	0.345198	1.37468e-05	0.00137954	#N/A	#N/A	#N/A	#N/A
		ENSG00000168071	CCDC88B	-0.677906	0.15589	1.36997e-05	0.00137954	#N/A	#N/A	#N/A	#N/A
		ENSG00000170456	DENND5B	-0.937018	0.215559	1.38062e-05	0.00137954	#N/A	#N/A	#N/A	#N/A
		ENSG00000157551	KCNJ15	-2.35151	0.54255	1.46309e-05	0.00143202	#N/A	#N/A	#N/A	#N/A
		ENSG00000163221	S100A12	-3.38926	0.782278	1.4739e-05	0.00143202	#N/A	#N/A	#N/A	#N/A
		ENSG00000153563	CD8A	-0.717777	0.165736	1.4854e-05	0.00143629	#N/A	#N/A	#N/A	#N/A
		ENSG00000135426	TESPA1	-1.02388	0.236703	1.52122e-05	0.00146392	#N/A	#N/A	#N/A	#N/A
		ENSG00000133048	CHI3L1	-3.54978	0.821255	1.54347e-05	0.00147829	#N/A	#N/A	#N/A	#N/A
		ENSG00000142748	FCN3	-2.42847	0.562914	1.60256e-05	0.00152765	#N/A	#N/A	#N/A	#N/A
		ENSG00000112115	IL17A	-2.72508	0.633274	1.68376e-05	0.00159005	#N/A	#N/A	#N/A	#N/A
		ENSG00000135898	GPR55	-1.02401	0.237928	1.6783e-05	0.00159005	#N/A	#N/A	#N/A	#N/A
		ENSG00000139190	VAMP1	-0.792715	0.184308	1.70009e-05	0.00159801	#N/A	#N/A	#N/A	#N/A
		ENSG00000140678	ITGAX	-1.55545	0.362091	1.74108e-05	0.00162896	#N/A	#N/A	#N/A	#N/A
		ENSG00000104894	CD37	-1.20467	0.280787	1.78416e-05	0.00166157	#N/A	#N/A	#N/A	#N/A
		ENSG00000007312	CD79B	-1.52453	0.355654	1.81461e-05	0.00167765	#N/A	#N/A	#N/A	#N/A
		ENSG00000162739	SLAMF6	-1.35486	0.316177	1.82633e-05	0.00167765	#N/A	#N/A	#N/A	#N/A
		ENSG00000267121	AC008105.3	-1.2218	0.285119	1.82551e-05	0.00167765	#N/A	#N/A	#N/A	#N/A
		ENSG00000107742	SPOCK2	-1.07673	0.251461	1.85325e-05	0.00169467	#N/A	#N/A	#N/A	#N/A
		ENSG00000211898	IGHD	-2.31052	0.539846	1.86924e-05	0.00170159	#N/A	#N/A	#N/A	#N/A
		ENSG00000049249	TNFRSF9	-1.62846	0.380774	1.89669e-05	0.00170356	#N/A	#N/A	#N/A	#N/A
		ENSG00000245164	LINC00861	-1.69374	0.39594	1.88782e-05	0.00170356	#N/A	#N/A	#N/A	#N/A
		ENSG00000128218	VPREB3	-1.71832	0.402088	1.92438e-05	0.00172079	#N/A	#N/A	#N/A	#N/A
		ENSG00000077420	APBB1IP	-0.996518	0.233308	1.9437e-05	0.00172377	#N/A	#N/A	#N/A	#N/A
		ENSG00000131389	SLC6A6	-1.00951	0.236411	1.9533e-05	0.00172377	#N/A	#N/A	#N/A	#N/A
		ENSG00000160683	CXCR5	-2.52087	0.590239	1.94661e-05	0.00172377	#N/A	#N/A	#N/A	#N/A
		ENSG00000168461	RAB31	-0.851315	0.199445	1.96854e-05	0.00172388	#N/A	#N/A	#N/A	#N/A
		ENSG00000196092	PAX5	-2.63048	0.616297	1.97049e-05	0.00172388	#N/A	#N/A	#N/A	#N/A
		ENSG00000226777	FAM30A	-1.21246	0.284215	1.99023e-05	0.00173364	#N/A	#N/A	#N/A	#N/A
		ENSG00000162551	ALPL	-1.34829	0.31621	2.00895e-05	0.00174244	#N/A	#N/A	#N/A	#N/A
		ENSG00000112182	BACH2	-1.27326	0.298872	2.04227e-05	0.00176377	#N/A	#N/A	#N/A	#N/A
		ENSG00000100342	APOL1	-1.46345	0.343967	2.09391e-05	0.00176488	#N/A	#N/A	#N/A	#N/A
		ENSG00000100368	CSF2RB	-1.23833	0.291041	2.09217e-05	0.00176488	#N/A	#N/A	#N/A	#N/A
		ENSG00000108342	CSF3	-4.43908	1.04258	2.06446e-05	0.00176488	#N/A	#N/A	#N/A	#N/A
		ENSG00000133962	CATSPERB	-1.08093	0.254125	2.10419e-05	0.00176488	#N/A	#N/A	#N/A	#N/A
		ENSG00000140379	BCL2A1	-1.73145	0.407067	2.10468e-05	0.00176488	#N/A	#N/A	#N/A	#N/A
		ENSG00000180096	SEPT1	-1.0673	0.25073	2.07391e-05	0.00176488	#N/A	#N/A	#N/A	#N/A
		ENSG00000243649	CFB	-1.43452	0.337171	2.09456e-05	0.00176488	#N/A	#N/A	#N/A	#N/A
		ENSG00000050438	SLC4A8	-0.908132	0.213577	2.11864e-05	0.00176924	#N/A	#N/A	#N/A	#N/A
		ENSG00000095383	TBC1D2	-0.486181	0.114558	2.19589e-05	0.0018262	#N/A	#N/A	#N/A	#N/A
		ENSG00000155966	AFF2	-2.61529	0.617363	2.27304e-05	0.00186049	#N/A	#N/A	#N/A	#N/A
		ENSG00000159753	CARMIL2	-1.08756	0.256659	2.26152e-05	0.00186049	#N/A	#N/A	#N/A	#N/A
		ENSG00000169248	CXCL11	-2.73692	0.645736	2.25072e-05	0.00186049	#N/A	#N/A	#N/A	#N/A
		ENSG00000178826	TMEM139	-0.667038	0.157464	2.27394e-05	0.00186049	#N/A	#N/A	#N/A	#N/A
		ENSG00000159261	CLDN14	-2.30853	0.545522	2.31854e-05	0.00187994	#N/A	#N/A	#N/A	#N/A
		ENSG00000147454	SLC25A37	-0.535023	0.126509	2.34581e-05	0.00188871	#N/A	#N/A	#N/A	#N/A
		ENSG00000100767	PAPLN	-0.995383	0.235432	2.35876e-05	0.0018914	#N/A	#N/A	#N/A	#N/A
		ENSG00000167207	NOD2	-1.23652	0.292537	2.36955e-05	0.0018914	#N/A	#N/A	#N/A	#N/A
		ENSG00000188089	PLA2G4E	-1.95653	0.462957	2.37723e-05	0.0018914	#N/A	#N/A	#N/A	#N/A
		ENSG00000131203	IDO1	-3.37593	0.800041	2.44637e-05	0.00193877	#N/A	#N/A	#N/A	#N/A
		ENSG00000167208	SNX20	-1.25598	0.297967	2.49583e-05	0.00195244	#N/A	#N/A	#N/A	#N/A
		ENSG00000168685	IL7R	-1.3446	0.319034	2.50226e-05	0.00195244	#N/A	#N/A	#N/A	#N/A
		ENSG00000187583	PLEKHN1	-1.1999	0.284541	2.47636e-05	0.00195244	#N/A	#N/A	#N/A	#N/A
		ENSG00000263264	AC119396.1	-2.25072	0.533941	2.49443e-05	0.00195244	#N/A	#N/A	#N/A	#N/A
		ENSG00000183091	NEB	-1.72948	0.410925	2.56804e-05	0.00198841	#N/A	#N/A	#N/A	#N/A
		ENSG00000271699	SNX29P2	-6.56331	1.55918	2.55969e-05	0.00198841	#N/A	#N/A	#N/A	#N/A
		ENSG00000124731	TREM1	-2.36544	0.562739	2.62886e-05	0.00202774	#N/A	#N/A	#N/A	#N/A
		ENSG00000101265	RASSF2	-0.893661	0.212672	2.64502e-05	0.00203244	#N/A	#N/A	#N/A	#N/A
		ENSG00000183844	FAM3B	-3.14793	0.750437	2.73114e-05	0.00209066	#N/A	#N/A	#N/A	#N/A
		ENSG00000182183	FAM159A	-1.73844	0.414518	2.74212e-05	0.00209115	#N/A	#N/A	#N/A	#N/A
		ENSG00000158023	WDR66	-1.36512	0.325575	2.75341e-05	0.00209187	#N/A	#N/A	#N/A	#N/A
		ENSG00000110665	C11orf21	-1.46996	0.350877	2.79717e-05	0.00210514	#N/A	#N/A	#N/A	#N/A
		ENSG00000146094	DOK3	-1.15577	0.275908	2.80213e-05	0.00210514	#N/A	#N/A	#N/A	#N/A
		ENSG00000172724	CCL19	-2.71545	0.648066	2.78842e-05	0.00210514	#N/A	#N/A	#N/A	#N/A
		ENSG00000197536	C5orf56	-0.62893	0.150297	2.85696e-05	0.00212266	#N/A	#N/A	#N/A	#N/A
		ENSG00000140968	IRF8	-0.453465	0.10848	2.91269e-05	0.00215054	#N/A	#N/A	#N/A	#N/A
		ENSG00000169385	RNASE2	-2.55192	0.610515	2.91578e-05	0.00215054	#N/A	#N/A	#N/A	#N/A
		ENSG00000149256	TENM4	-1.53784	0.36829	2.97165e-05	0.00218378	#N/A	#N/A	#N/A	#N/A
		ENSG00000082074	FYB	-0.995774	0.238603	3.00155e-05	0.00219776	#N/A	#N/A	#N/A	#N/A
		ENSG00000136167	LCP1	-1.24757	0.299094	3.03044e-05	0.00221091	#N/A	#N/A	#N/A	#N/A
		ENSG00000117322	CR2	-2.48574	0.596635	3.09633e-05	0.00225085	#N/A	#N/A	#N/A	#N/A
		ENSG00000081237	PTPRC	-1.28622	0.309204	3.18534e-05	0.00229344	#N/A	#N/A	#N/A	#N/A
		ENSG00000196405	EVL	-0.782022	0.188007	3.18896e-05	0.00229344	#N/A	#N/A	#N/A	#N/A
		ENSG00000112303	VNN2	-1.69789	0.409442	3.37106e-05	0.00241572	#N/A	#N/A	#N/A	#N/A
		ENSG00000189233	NUGGC	-1.31522	0.317224	3.38289e-05	0.00241572	#N/A	#N/A	#N/A	#N/A
		ENSG00000134954	ETS1	-0.771031	0.186052	3.41058e-05	0.00242008	#N/A	#N/A	#N/A	#N/A
		ENSG00000188676	IDO2	-2.47327	0.596831	3.41295e-05	0.00242008	#N/A	#N/A	#N/A	#N/A
		ENSG00000142347	MYO1F	-0.99813	0.241373	3.54613e-05	0.002497	#N/A	#N/A	#N/A	#N/A
		ENSG00000144837	PLA1A	-1.88257	0.455601	3.59516e-05	0.00252273	#N/A	#N/A	#N/A	#N/A
		ENSG00000119771	KLHL29	-0.687967	0.166698	3.67481e-05	0.0025697	#N/A	#N/A	#N/A	#N/A
		ENSG00000227507	LTB	-1.41562	0.343772	3.82313e-05	0.00265504	#N/A	#N/A	#N/A	#N/A
		ENSG00000072694	FCGR2B	-1.05775	0.257074	3.87911e-05	0.00268469	#N/A	#N/A	#N/A	#N/A
		ENSG00000100344	PNPLA3	-2.38454	0.579649	3.89253e-05	0.00268479	#N/A	#N/A	#N/A	#N/A
		ENSG00000078081	LAMP3	-1.7357	0.422191	3.93674e-05	0.00270504	#N/A	#N/A	#N/A	#N/A
		ENSG00000144802	NFKBIZ	-0.889361	0.216365	3.94866e-05	0.00270504	#N/A	#N/A	#N/A	#N/A
		ENSG00000068831	RASGRP2	-1.21336	0.295311	3.97786e-05	0.00271583	#N/A	#N/A	#N/A	#N/A
		ENSG00000159337	PLA2G4D	-1.24354	0.302889	4.03263e-05	0.00274395	#N/A	#N/A	#N/A	#N/A
		ENSG00000111732	AICDA	-3.41449	0.832226	4.08108e-05	0.00275835	#N/A	#N/A	#N/A	#N/A
		ENSG00000148175	STOM	-1.08547	0.265329	4.29487e-05	0.00288914	#N/A	#N/A	#N/A	#N/A
		ENSG00000183813	CCR4	-1.59686	0.390375	4.30319e-05	0.00288914	#N/A	#N/A	#N/A	#N/A
		ENSG00000149485	FADS1	-1.51304	0.370118	4.35129e-05	0.00291176	#N/A	#N/A	#N/A	#N/A
		ENSG00000227039	ITGB2-AS1	-1.39273	0.340979	4.41735e-05	0.00294491	#N/A	#N/A	#N/A	#N/A
		ENSG00000254415	SIGLEC14	-1.42418	0.349114	4.51477e-05	0.00299144	#N/A	#N/A	#N/A	#N/A
		ENSG00000112212	TSPO2	-3.59284	0.881801	4.61262e-05	0.00303637	#N/A	#N/A	#N/A	#N/A
		ENSG00000170542	SERPINB9	-1.15125	0.282678	4.64844e-05	0.00305001	#N/A	#N/A	#N/A	#N/A
		ENSG00000138964	PARVG	-1.01308	0.248841	4.67775e-05	0.00305931	#N/A	#N/A	#N/A	#N/A
		ENSG00000104415	WISP1	-2.4678	0.606528	4.72677e-05	0.00306025	#N/A	#N/A	#N/A	#N/A
		ENSG00000138449	SLC40A1	-0.812818	0.199803	4.73976e-05	0.00306025	#N/A	#N/A	#N/A	#N/A
		ENSG00000166501	PRKCB	-1.2419	0.305276	4.73966e-05	0.00306025	#N/A	#N/A	#N/A	#N/A
		ENSG00000198520	C1orf228	-1.07272	0.263676	4.73536e-05	0.00306025	#N/A	#N/A	#N/A	#N/A
		ENSG00000136490	LIMD2	-1.31397	0.323389	4.84193e-05	0.00311626	#N/A	#N/A	#N/A	#N/A
		ENSG00000116701	NCF2	-1.2099	0.297987	4.90212e-05	0.00313503	#N/A	#N/A	#N/A	#N/A
		ENSG00000091592	NLRP1	-0.635745	0.156665	4.9498e-05	0.00315554	#N/A	#N/A	#N/A	#N/A
		ENSG00000102245	CD40LG	-0.946811	0.233399	4.97889e-05	0.0031641	#N/A	#N/A	#N/A	#N/A
		ENSG00000147689	FAM83A	-2.57974	0.636068	4.99703e-05	0.00316568	#N/A	#N/A	#N/A	#N/A
		ENSG00000054938	CHRDL2	-2.63369	0.649576	5.02488e-05	0.00317337	#N/A	#N/A	#N/A	#N/A
		ENSG00000125354	SEPT6	-0.864206	0.213221	5.05419e-05	0.00318193	#N/A	#N/A	#N/A	#N/A
		ENSG00000058866	DGKG	-1.30622	0.322365	5.07855e-05	0.00318734	#N/A	#N/A	#N/A	#N/A
		ENSG00000134594	RAB33A	-1.2238	0.302565	5.2381e-05	0.0032773	#N/A	#N/A	#N/A	#N/A
		ENSG00000003400	CASP10	-0.638401	0.158056	5.36612e-05	0.00333699	#N/A	#N/A	#N/A	#N/A
		ENSG00000128340	RAC2	-0.979961	0.242621	5.36652e-05	0.00333699	#N/A	#N/A	#N/A	#N/A
		ENSG00000100055	CYTH4	-0.873074	0.216671	5.58974e-05	0.003444	#N/A	#N/A	#N/A	#N/A
		ENSG00000163421	PROK2	-4.11681	1.02152	5.57578e-05	0.003444	#N/A	#N/A	#N/A	#N/A
		ENSG00000054598	FOXC1	-1.39221	0.345823	5.67882e-05	0.00347768	#N/A	#N/A	#N/A	#N/A
		ENSG00000134757	DSG3	-2.62072	0.650918	5.66888e-05	0.00347768	#N/A	#N/A	#N/A	#N/A
		ENSG00000141506	PIK3R5	-0.830776	0.206411	5.70083e-05	0.00348061	#N/A	#N/A	#N/A	#N/A
		ENSG00000075618	FSCN1	-0.960285	0.238853	5.81013e-05	0.00353665	#N/A	#N/A	#N/A	#N/A
		ENSG00000176971	FIBIN	-1.07727	0.26824	5.91813e-05	0.00359158	#N/A	#N/A	#N/A	#N/A
		ENSG00000261644	AC007728.2	-1.50609	0.375698	6.10304e-05	0.00368168	#N/A	#N/A	#N/A	#N/A
		ENSG00000124721	DNAH8	-2.33507	0.583847	6.34895e-05	0.00380941	#N/A	#N/A	#N/A	#N/A
		ENSG00000169403	PTAFR	-1.19395	0.298538	6.35247e-05	0.00380941	#N/A	#N/A	#N/A	#N/A
		ENSG00000174130	TLR6	-1.20254	0.30077	6.38273e-05	0.00381623	#N/A	#N/A	#N/A	#N/A
		ENSG00000111536	IL26	-2.31298	0.578766	6.43128e-05	0.00383392	#N/A	#N/A	#N/A	#N/A
		ENSG00000069424	KCNAB2	-0.930172	0.232945	6.52142e-05	0.00387622	#N/A	#N/A	#N/A	#N/A
		ENSG00000015285	WAS	-0.969371	0.242943	6.60399e-05	0.00391378	#N/A	#N/A	#N/A	#N/A
		ENSG00000174500	GCSAM	-1.52301	0.381946	6.67731e-05	0.00394567	#N/A	#N/A	#N/A	#N/A
		ENSG00000084110	HAL	-1.66021	0.416484	6.71277e-05	0.00395506	#N/A	#N/A	#N/A	#N/A
		ENSG00000152128	TMEM163	-1.88681	0.474478	6.99071e-05	0.00410684	#N/A	#N/A	#N/A	#N/A
		ENSG00000078098	FAP	-1.85814	0.467925	7.15673e-05	0.00418007	#N/A	#N/A	#N/A	#N/A
		ENSG00000140274	DUOXA2	-2.50271	0.631354	7.36942e-05	0.00429189	#N/A	#N/A	#N/A	#N/A
		ENSG00000155926	SLA	-1.115	0.281359	7.40425e-05	0.00429978	#N/A	#N/A	#N/A	#N/A
		ENSG00000138795	LEF1	-0.791482	0.199823	7.46634e-05	0.00432342	#N/A	#N/A	#N/A	#N/A
		ENSG00000126759	CFP	-1.23052	0.310895	7.55831e-05	0.00432708	#N/A	#N/A	#N/A	#N/A
		ENSG00000183918	SH2D1A	-1.29045	0.32602	7.55221e-05	0.00432708	#N/A	#N/A	#N/A	#N/A
		ENSG00000196839	ADA	-1.0161	0.256703	7.54869e-05	0.00432708	#N/A	#N/A	#N/A	#N/A
		ENSG00000018280	SLC11A1	-1.73495	0.438613	7.63599e-05	0.00434516	#N/A	#N/A	#N/A	#N/A
		ENSG00000020633	RUNX3	-0.902528	0.228199	7.65318e-05	0.00434516	#N/A	#N/A	#N/A	#N/A
		ENSG00000243811	APOBEC3D	-0.765647	0.193646	7.69041e-05	0.00435338	#N/A	#N/A	#N/A	#N/A
		ENSG00000215252	GOLGA8B	-0.604307	0.152963	7.79349e-05	0.00439941	#N/A	#N/A	#N/A	#N/A
		ENSG00000168679	SLC16A4	-1.16703	0.295587	7.87518e-05	0.00440858	#N/A	#N/A	#N/A	#N/A
		ENSG00000254838	GVINP1	-1.21517	0.307713	7.84636e-05	0.00440858	#N/A	#N/A	#N/A	#N/A
		ENSG00000260997	AC004847.1	-1.17692	0.298078	7.86854e-05	0.00440858	#N/A	#N/A	#N/A	#N/A
		ENSG00000160791	CCR5	-1.05209	0.267135	8.20137e-05	0.00456588	#N/A	#N/A	#N/A	#N/A
		ENSG00000187621	TCL6	-2.00544	0.509142	8.18712e-05	0.00456588	#N/A	#N/A	#N/A	#N/A
		ENSG00000142405	NLRP12	-1.71264	0.434965	8.23628e-05	0.00457272	#N/A	#N/A	#N/A	#N/A
		ENSG00000026036	RTEL1-TNFRSF6B	-1.5496	0.393748	8.30152e-05	0.00459631	#N/A	#N/A	#N/A	#N/A
		ENSG00000134817	APLNR	-0.571238	0.145226	8.37414e-05	0.00462385	#N/A	#N/A	#N/A	#N/A
		ENSG00000088992	TESC	-1.11905	0.284574	8.41166e-05	0.00463191	#N/A	#N/A	#N/A	#N/A
		ENSG00000198851	CD3E	-0.844594	0.214856	8.46004e-05	0.00464589	#N/A	#N/A	#N/A	#N/A
		ENSG00000107099	DOCK8	-0.95364	0.242663	8.49808e-05	0.00465414	#N/A	#N/A	#N/A	#N/A
		ENSG00000156127	BATF	-1.21041	0.308146	8.56369e-05	0.00467739	#N/A	#N/A	#N/A	#N/A
		ENSG00000128383	APOBEC3A	-1.10353	0.281072	8.63226e-05	0.00470094	#N/A	#N/A	#N/A	#N/A
		ENSG00000239951	IGKV3-20	-1.41049	0.359492	8.72524e-05	0.0047273	#N/A	#N/A	#N/A	#N/A
		ENSG00000125245	GPR18	-1.60677	0.409834	8.83521e-05	0.00477408	#N/A	#N/A	#N/A	#N/A
		ENSG00000127084	FGD3	-0.750095	0.191387	8.88241e-05	0.00478679	#N/A	#N/A	#N/A	#N/A
		ENSG00000126001	CEP250	-0.375144	0.0957423	8.91873e-05	0.00479358	#N/A	#N/A	#N/A	#N/A
		ENSG00000160219	GAB3	-0.783961	0.200193	9.00225e-05	0.00482564	#N/A	#N/A	#N/A	#N/A
		ENSG00000159618	ADGRG5	-1.04673	0.267398	9.05859e-05	0.00483563	#N/A	#N/A	#N/A	#N/A
		ENSG00000163347	CLDN1	-1.3156	0.336312	9.1595e-05	0.00487117	#N/A	#N/A	#N/A	#N/A
		ENSG00000176788	BASP1	-1.19859	0.306775	9.34232e-05	0.00494987	#N/A	#N/A	#N/A	#N/A
		ENSG00000211661	IGLV3-22	-3.71368	0.950593	9.35648e-05	0.00494987	#N/A	#N/A	#N/A	#N/A
		ENSG00000081059	TCF7	-0.72703	0.186156	9.40379e-05	0.00496191	#N/A	#N/A	#N/A	#N/A
		ENSG00000115919	KYNU	-2.21434	0.567197	9.46145e-05	0.00496948	#N/A	#N/A	#N/A	#N/A
		ENSG00000143297	FCRL5	-1.38897	0.355794	9.46731e-05	0.00496948	#N/A	#N/A	#N/A	#N/A
		ENSG00000173821	RNF213	-1.00624	0.257858	9.5285e-05	0.00498052	#N/A	#N/A	#N/A	#N/A
		ENSG00000196358	NTNG2	-1.19794	0.307073	9.5732e-05	0.00498621	#N/A	#N/A	#N/A	#N/A
		ENSG00000183615	FAM167B	-1.22099	0.313088	9.62572e-05	0.00500067	#N/A	#N/A	#N/A	#N/A
		ENSG00000112559	MDFI	-1.28908	0.331269	9.96973e-05	0.00512755	#N/A	#N/A	#N/A	#N/A
		ENSG00000151702	FLI1	-0.766761	0.19703	9.95887e-05	0.00512755	#N/A	#N/A	#N/A	#N/A
		ENSG00000122025	FLT3	-1.50324	0.386778	0.000101669	0.00521478	#N/A	#N/A	#N/A	#N/A
		ENSG00000101445	PPP1R16B	-1.02028	0.262718	0.000102935	0.00524871	#N/A	#N/A	#N/A	#N/A
		ENSG00000152969	JAKMIP1	-1.72408	0.443885	0.000102721	0.00524871	#N/A	#N/A	#N/A	#N/A
		ENSG00000137078	SIT1	-1.13011	0.291172	0.000103921	0.00527674	#N/A	#N/A	#N/A	#N/A
		ENSG00000160183	TMPRSS3	-0.865454	0.223227	0.00010575	0.00534277	#N/A	#N/A	#N/A	#N/A
		ENSG00000158485	CD1B	-2.06492	0.53327	0.000107867	0.0054226	#N/A	#N/A	#N/A	#N/A
		ENSG00000140279	DUOX2	-2.23542	0.57772	0.000109109	0.00547141	#N/A	#N/A	#N/A	#N/A
		ENSG00000059145	UNKL	-0.553753	0.143285	0.000111227	0.00556382	#N/A	#N/A	#N/A	#N/A
		ENSG00000186174	BCL9L	-0.568498	0.147138	0.000111673	0.00557233	#N/A	#N/A	#N/A	#N/A
		ENSG00000137462	TLR2	-1.21967	0.31664	0.000117193	0.00583337	#N/A	#N/A	#N/A	#N/A
		ENSG00000159399	HK2	-0.717667	0.186597	0.000120024	0.0059596	#N/A	#N/A	#N/A	#N/A
		ENSG00000133317	LGALS12	-2.19835	0.572124	0.000121816	0.00603376	#N/A	#N/A	#N/A	#N/A
		ENSG00000253364	AL928742.1	-2.02288	0.526881	0.000123366	0.00609563	#N/A	#N/A	#N/A	#N/A
		ENSG00000125910	S1PR4	-1.31286	0.342008	0.000123704	0.00609741	#N/A	#N/A	#N/A	#N/A
		ENSG00000143869	GDF7	-1.39902	0.36487	0.000125928	0.00619193	#N/A	#N/A	#N/A	#N/A
		ENSG00000139436	GIT2	-0.403103	0.105153	0.000126342	0.00619719	#N/A	#N/A	#N/A	#N/A
		ENSG00000169220	RGS14	-0.533007	0.139064	0.000126685	0.00619896	#N/A	#N/A	#N/A	#N/A
		ENSG00000010671	BTK	-1.01208	0.264099	0.000127009	0.00619947	#N/A	#N/A	#N/A	#N/A
		ENSG00000109625	CPZ	-1.97985	0.516716	0.000127309	0.00619947	#N/A	#N/A	#N/A	#N/A
		ENSG00000211976	IGHV3-73	-1.357	0.354219	0.000127648	0.00620105	#N/A	#N/A	#N/A	#N/A
		ENSG00000176170	SPHK1	-1.1028	0.288024	0.000128751	0.00622469	#N/A	#N/A	#N/A	#N/A
		ENSG00000172578	KLHL6	-1.25739	0.328506	0.000129397	0.006241	#N/A	#N/A	#N/A	#N/A
		ENSG00000135439	AGAP2	-0.922275	0.241096	0.000130589	0.00628351	#N/A	#N/A	#N/A	#N/A
		ENSG00000158517	NCF1	-1.26856	0.331692	0.000131027	0.00628963	#N/A	#N/A	#N/A	#N/A
		ENSG00000107968	MAP3K8	-1.06269	0.277991	0.00013197	0.00631986	#N/A	#N/A	#N/A	#N/A
		ENSG00000232810	TNF	-1.26812	0.331963	0.000133414	0.00637391	#N/A	#N/A	#N/A	#N/A
		ENSG00000122188	LAX1	-1.38657	0.363235	0.000134928	0.00643104	#N/A	#N/A	#N/A	#N/A
		ENSG00000102145	GATA1	-1.85112	0.48533	0.000136655	0.00645248	#N/A	#N/A	#N/A	#N/A
		ENSG00000177409	SAMD9L	-1.1641	0.305176	0.00013644	0.00645248	#N/A	#N/A	#N/A	#N/A
		ENSG00000113916	BCL6	-0.902582	0.236763	0.000137751	0.00647396	#N/A	#N/A	#N/A	#N/A
		ENSG00000128422	KRT17	-2.21864	0.581984	0.000137732	0.00647396	#N/A	#N/A	#N/A	#N/A
		ENSG00000162654	GBP4	-1.45007	0.380676	0.00013941	0.00652162	#N/A	#N/A	#N/A	#N/A
		ENSG00000056558	TRAF1	-1.04565	0.275418	0.000146707	0.00684713	#N/A	#N/A	#N/A	#N/A
		ENSG00000095370	SH2D3C	-0.758639	0.199906	0.000147655	0.00687548	#N/A	#N/A	#N/A	#N/A
		ENSG00000163219	ARHGAP25	-0.955391	0.251839	0.00014844	0.00688031	#N/A	#N/A	#N/A	#N/A
		ENSG00000204252	HLA-DOA	-1.04759	0.27613	0.000148342	0.00688031	#N/A	#N/A	#N/A	#N/A
		ENSG00000132357	CARD6	-0.849484	0.224075	0.000149996	0.0069207	#N/A	#N/A	#N/A	#N/A
		ENSG00000102970	CCL17	-2.81355	0.742418	0.000150821	0.0069429	#N/A	#N/A	#N/A	#N/A
		ENSG00000183688	RFLNB	-0.592735	0.156585	0.000153468	0.007036	#N/A	#N/A	#N/A	#N/A
		ENSG00000205403	CFI	-1.44677	0.382209	0.000153539	0.007036	#N/A	#N/A	#N/A	#N/A
		ENSG00000162366	PDZK1IP1	-1.16736	0.308496	0.000154309	0.00705525	#N/A	#N/A	#N/A	#N/A
		ENSG00000137478	FCHSD2	-0.463435	0.122509	0.000155033	0.00707236	#N/A	#N/A	#N/A	#N/A
		ENSG00000184602	SNN	-0.839028	0.221839	0.000155481	0.00707682	#N/A	#N/A	#N/A	#N/A
		ENSG00000185479	KRT6B	-2.9096	0.770335	0.000158691	0.00719056	#N/A	#N/A	#N/A	#N/A
		ENSG00000139899	CBLN3	-0.790592	0.209386	0.000159522	0.00721204	#N/A	#N/A	#N/A	#N/A
		ENSG00000225614	ZNF469	-1.02356	0.271422	0.000162519	0.00733112	#N/A	#N/A	#N/A	#N/A
		ENSG00000187961	KLHL17	-0.513319	0.136169	0.000163434	0.00735598	#N/A	#N/A	#N/A	#N/A
		ENSG00000163053	SLC16A14	-0.979353	0.259901	0.000164446	0.0073851	#N/A	#N/A	#N/A	#N/A
		ENSG00000065923	SLC9A7	-0.867656	0.23042	0.000166187	0.00744671	#N/A	#N/A	#N/A	#N/A
		ENSG00000124201	ZNFX1	-0.628638	0.166998	0.000166991	0.00744972	#N/A	#N/A	#N/A	#N/A
		ENSG00000099308	MAST3	-0.43464	0.115513	0.000168099	0.00748262	#N/A	#N/A	#N/A	#N/A
		ENSG00000138755	CXCL9	-2.79975	0.744314	0.000168889	0.00750128	#N/A	#N/A	#N/A	#N/A
		ENSG00000105851	PIK3CG	-0.823998	0.219535	0.000174469	0.00773212	#N/A	#N/A	#N/A	#N/A
		ENSG00000241106	HLA-DOB	-1.31125	0.34991	0.000178677	0.00790128	#N/A	#N/A	#N/A	#N/A
		ENSG00000029153	ARNTL2	-1.15544	0.308487	0.000180034	0.0079439	#N/A	#N/A	#N/A	#N/A
		ENSG00000111728	ST8SIA1	-0.864397	0.230874	0.0001811	0.00795963	#N/A	#N/A	#N/A	#N/A
		ENSG00000151790	TDO2	-1.69199	0.452064	0.000181966	0.00795963	#N/A	#N/A	#N/A	#N/A
		ENSG00000186265	BTLA	-1.31744	0.351954	0.000181679	0.00795963	#N/A	#N/A	#N/A	#N/A
		ENSG00000204839	MROH6	-0.654307	0.174776	0.00018134	0.00795963	#N/A	#N/A	#N/A	#N/A
		ENSG00000071575	TRIB2	-1.07223	0.286612	0.000183255	0.00798711	#N/A	#N/A	#N/A	#N/A
		ENSG00000205744	DENND1C	-0.799223	0.213646	0.000183385	0.00798711	#N/A	#N/A	#N/A	#N/A
		ENSG00000124126	PREX1	-0.732237	0.19591	0.000185765	0.0080734	#N/A	#N/A	#N/A	#N/A
		ENSG00000113263	ITK	-1.12237	0.300435	0.000187099	0.00809653	#N/A	#N/A	#N/A	#N/A
		ENSG00000088836	SLC4A11	-1.36884	0.366547	0.000188159	0.00812501	#N/A	#N/A	#N/A	#N/A
		ENSG00000162894	FCMR	-1.10607	0.29632	0.000189439	0.00816285	#N/A	#N/A	#N/A	#N/A
		ENSG00000197943	PLCG2	-0.74093	0.198541	0.000190054	0.00817194	#N/A	#N/A	#N/A	#N/A
		ENSG00000143921	ABCG8	-1.41407	0.379003	0.000190691	0.00818188	#N/A	#N/A	#N/A	#N/A
		ENSG00000103534	TMC5	-0.684781	0.18393	0.000196837	0.00837447	#N/A	#N/A	#N/A	#N/A
		ENSG00000110448	CD5	-0.918761	0.246743	0.00019644	0.00837447	#N/A	#N/A	#N/A	#N/A
		ENSG00000140464	PML	-0.698967	0.187785	0.000197512	0.00838554	#N/A	#N/A	#N/A	#N/A
		ENSG00000149968	MMP3	-2.80377	0.753403	0.000198062	0.00839129	#N/A	#N/A	#N/A	#N/A
		ENSG00000188001	TPRG1	-1.26399	0.339831	0.000199632	0.00842249	#N/A	#N/A	#N/A	#N/A
		ENSG00000211751	AC245427.1	-0.879301	0.236384	0.00019938	0.00842249	#N/A	#N/A	#N/A	#N/A
		ENSG00000163600	ICOS	-1.5803	0.424968	0.000200294	0.00843279	#N/A	#N/A	#N/A	#N/A
		ENSG00000160991	ORAI2	-0.914615	0.245995	0.000200791	0.00843613	#N/A	#N/A	#N/A	#N/A
		ENSG00000170581	STAT2	-0.533483	0.143699	0.000205227	0.00860465	#N/A	#N/A	#N/A	#N/A
		ENSG00000165188	RNF183	-1.37848	0.371447	0.000206352	0.0086339	#N/A	#N/A	#N/A	#N/A
		ENSG00000043462	LCP2	-0.896102	0.241542	0.000207319	0.00863859	#N/A	#N/A	#N/A	#N/A
		ENSG00000173578	XCR1	-1.80166	0.485608	0.000207176	0.00863859	#N/A	#N/A	#N/A	#N/A
		ENSG00000239998	LILRA2	-1.6545	0.446345	0.000209921	0.00869323	#N/A	#N/A	#N/A	#N/A
		ENSG00000211599	IGKV5-2	-1.55715	0.42044	0.000212536	0.0087656	#N/A	#N/A	#N/A	#N/A
		ENSG00000224397	SMIM25	-1.71225	0.462302	0.000212434	0.0087656	#N/A	#N/A	#N/A	#N/A
		ENSG00000158055	GRHL3	-1.85589	0.501632	0.000215857	0.00888442	#N/A	#N/A	#N/A	#N/A
		ENSG00000131042	LILRB2	-1.114	0.301166	0.000216476	0.0088918	#N/A	#N/A	#N/A	#N/A
		ENSG00000023171	GRAMD1B	-0.927386	0.250804	0.000217599	0.00891627	#N/A	#N/A	#N/A	#N/A
		ENSG00000180720	CHRM4	-1.85726	0.502335	0.000217954	0.00891627	#N/A	#N/A	#N/A	#N/A
		ENSG00000064692	SNCAIP	-1.13242	0.306442	0.00021955	0.00894535	#N/A	#N/A	#N/A	#N/A
		ENSG00000211949	IGHV3-23	-1.09118	0.29528	0.000219544	0.00894535	#N/A	#N/A	#N/A	#N/A
		ENSG00000163735	CXCL5	-3.71245	1.00571	0.000223037	0.00905091	#N/A	#N/A	#N/A	#N/A
		ENSG00000055163	CYFIP2	-0.440409	0.119336	0.000223805	0.0090639	#N/A	#N/A	#N/A	#N/A
		ENSG00000178175	ZNF366	-1.09403	0.296491	0.000224324	0.00906621	#N/A	#N/A	#N/A	#N/A
		ENSG00000211965	IGHV3-49	-1.38064	0.37424	0.000224971	0.00906621	#N/A	#N/A	#N/A	#N/A
		ENSG00000276231	PIK3R6	-0.696354	0.188769	0.000225209	0.00906621	#N/A	#N/A	#N/A	#N/A
		ENSG00000205056	LINC02397	-1.75372	0.475675	0.000227082	0.00912345	#N/A	#N/A	#N/A	#N/A
		ENSG00000128815	WDFY4	-1.35911	0.369003	0.000230317	0.00923508	#N/A	#N/A	#N/A	#N/A
		ENSG00000152207	CYSLTR2	-1.23952	0.337526	0.000240301	0.00959733	#N/A	#N/A	#N/A	#N/A
		ENSG00000232629	HLA-DQB2	-0.972553	0.2648	0.000239926	0.00959733	#N/A	#N/A	#N/A	#N/A
		ENSG00000107317	PTGDS	-1.34402	0.366316	0.000243483	0.0097052	#N/A	#N/A	#N/A	#N/A
		ENSG00000179909	ZNF154	-1.04923	0.286086	0.000244892	0.00974217	#N/A	#N/A	#N/A	#N/A
		ENSG00000147408	CSGALNACT1	-0.92338	0.251873	0.000246317	0.00977961	#N/A	#N/A	#N/A	#N/A
		ENSG00000121210	KIAA0922	-0.872836	0.238185	0.000247794	0.00979975	#N/A	#N/A	#N/A	#N/A
		ENSG00000012660	ELOVL5	-0.892925	0.243921	0.000251513	0.009835	#N/A	#N/A	#N/A	#N/A
		ENSG00000133574	GIMAP4	-0.671611	0.183469	0.000251606	0.009835	#N/A	#N/A	#N/A	#N/A
		ENSG00000143333	RGS16	-1.10545	0.301972	0.000251447	0.009835	#N/A	#N/A	#N/A	#N/A
		ENSG00000145040	UCN2	-2.12923	0.581552	0.000250942	0.009835	#N/A	#N/A	#N/A	#N/A
		ENSG00000148848	ADAM12	-1.485	0.405454	0.000249709	0.009835	#N/A	#N/A	#N/A	#N/A
		ENSG00000172349	IL16	-0.840418	0.229696	0.000253364	0.00988464	#N/A	#N/A	#N/A	#N/A
		ENSG00000130477	UNC13A	-0.799032	0.218464	0.000254686	0.00991703	#N/A	#N/A	#N/A	#N/A
		ENSG00000181617	FDCSP	-2.5618	0.700659	0.000255916	0.00994577	#N/A	#N/A	#N/A	#N/A
		ENSG00000162645	GBP2	-0.83604	0.228876	0.000259384	0.0100612	#N/A	#N/A	#N/A	#N/A
		ENSG00000073464	CLCN4	-0.92118	0.252475	0.000263672	0.0102026	#N/A	#N/A	#N/A	#N/A
		ENSG00000124772	CPNE5	-0.863242	0.236618	0.000264039	0.0102026	#N/A	#N/A	#N/A	#N/A
		ENSG00000282651	AC247036.6	-1.07722	0.295323	0.000264698	0.0102085	#N/A	#N/A	#N/A	#N/A
		ENSG00000204516	MICB	-0.976395	0.267952	0.000268519	0.0103165	#N/A	#N/A	#N/A	#N/A
		ENSG00000160654	CD3G	-0.985891	0.270607	0.000269206	0.0103233	#N/A	#N/A	#N/A	#N/A
		ENSG00000133466	C1QTNF6	-0.876401	0.240614	0.00027016	0.0103403	#N/A	#N/A	#N/A	#N/A
		ENSG00000166750	SLFN5	-0.983481	0.270097	0.000271354	0.0103663	#N/A	#N/A	#N/A	#N/A
		ENSG00000164400	CSF2	-2.82915	0.777192	0.000272405	0.0103869	#N/A	#N/A	#N/A	#N/A
		ENSG00000069493	CLEC2D	-1.07163	0.294465	0.000273428	0.0104062	#N/A	#N/A	#N/A	#N/A
		ENSG00000104972	LILRB1	-1.06053	0.291506	0.000274656	0.0104137	#N/A	#N/A	#N/A	#N/A
		ENSG00000261884	AC040162.1	-0.584914	0.160759	0.000274286	0.0104137	#N/A	#N/A	#N/A	#N/A
		ENSG00000135074	ADAM19	-0.7997	0.219936	0.000276834	0.0104663	#N/A	#N/A	#N/A	#N/A
		ENSG00000168310	IRF2	-0.316489	0.0870469	0.000277078	0.0104663	#N/A	#N/A	#N/A	#N/A
		ENSG00000115935	WIPF1	-0.912162	0.251039	0.000279545	0.0105202	#N/A	#N/A	#N/A	#N/A
		ENSG00000139182	CLSTN3	-0.657845	0.181152	0.000281823	0.0105862	#N/A	#N/A	#N/A	#N/A
		ENSG00000123338	NCKAP1L	-0.93823	0.258444	0.000283087	0.0105943	#N/A	#N/A	#N/A	#N/A
		ENSG00000140932	CMTM2	-2.27125	0.625696	0.000283471	0.0105943	#N/A	#N/A	#N/A	#N/A
		ENSG00000154217	PITPNC1	-0.723177	0.199232	0.000283611	0.0105943	#N/A	#N/A	#N/A	#N/A
		ENSG00000141968	VAV1	-0.632786	0.174565	0.000289027	0.0107372	#N/A	#N/A	#N/A	#N/A
		ENSG00000213903	LTB4R	-0.617715	0.170438	0.000289777	0.0107452	#N/A	#N/A	#N/A	#N/A
		ENSG00000128284	APOL3	-1.00193	0.276494	0.000290419	0.0107492	#N/A	#N/A	#N/A	#N/A
		ENSG00000136048	DRAM1	-0.966824	0.267067	0.000294421	0.0108749	#N/A	#N/A	#N/A	#N/A
		ENSG00000174007	CEP19	-0.85691	0.236763	0.000295429	0.0108749	#N/A	#N/A	#N/A	#N/A
		ENSG00000204792	LINC01291	-2.77032	0.76624	0.000299796	0.0109956	#N/A	#N/A	#N/A	#N/A
		ENSG00000211899	IGHM	-1.16169	0.3213	0.000299644	0.0109956	#N/A	#N/A	#N/A	#N/A
		ENSG00000114270	COL7A1	-1.06387	0.294779	0.000307329	0.0112109	#N/A	#N/A	#N/A	#N/A
		ENSG00000165376	CLDN2	-2.05673	0.569826	0.000306913	0.0112109	#N/A	#N/A	#N/A	#N/A
		ENSG00000225492	GBP1P1	-1.55355	0.430452	0.000307261	0.0112109	#N/A	#N/A	#N/A	#N/A
		ENSG00000089012	SIRPG	-1.16061	0.321951	0.00031223	0.0112883	#N/A	#N/A	#N/A	#N/A
		ENSG00000101846	STS	-1.02337	0.283836	0.000311551	0.0112883	#N/A	#N/A	#N/A	#N/A
		ENSG00000134489	HRH4	-1.74879	0.485193	0.000312973	0.0112944	#N/A	#N/A	#N/A	#N/A
		ENSG00000171777	RASGRP4	-0.791825	0.219723	0.000313667	0.0112993	#N/A	#N/A	#N/A	#N/A
		ENSG00000123838	C4BPA	-2.14788	0.596725	0.000318888	0.0114669	#N/A	#N/A	#N/A	#N/A
		ENSG00000150551	LYPD1	-1.82289	0.506658	0.000320835	0.011496	#N/A	#N/A	#N/A	#N/A
		ENSG00000230836	LINC01293	-2.53394	0.704207	0.000320317	0.011496	#N/A	#N/A	#N/A	#N/A
		ENSG00000226419	SLC16A1-AS1	-1.07683	0.29945	0.000323127	0.0115372	#N/A	#N/A	#N/A	#N/A
		ENSG00000181634	TNFSF15	-0.869935	0.241966	0.000324048	0.0115376	#N/A	#N/A	#N/A	#N/A
		ENSG00000105205	CLC	-2.79537	0.777666	0.000324936	0.0115407	#N/A	#N/A	#N/A	#N/A
		ENSG00000064886	CHI3L2	-2.48946	0.692766	0.000326259	0.0115673	#N/A	#N/A	#N/A	#N/A
		ENSG00000151388	ADAMTS12	-1.32144	0.368129	0.000331167	0.0117003	#N/A	#N/A	#N/A	#N/A
		ENSG00000140105	WARS	-1.15094	0.320736	0.000332673	0.0117125	#N/A	#N/A	#N/A	#N/A
		ENSG00000211945	IGHV1-18	-1.17	0.326026	0.000332352	0.0117125	#N/A	#N/A	#N/A	#N/A
		ENSG00000086548	CEACAM6	-0.808166	0.225271	0.000333833	0.0117329	#N/A	#N/A	#N/A	#N/A
		ENSG00000233695	GAS6-AS1	-1.04841	0.292288	0.000334608	0.0117397	#N/A	#N/A	#N/A	#N/A
		ENSG00000100060	MFNG	-0.691521	0.19288	0.000336773	0.0117437	#N/A	#N/A	#N/A	#N/A
		ENSG00000134571	MYBPC3	-1.85794	0.518147	0.000336116	0.0117437	#N/A	#N/A	#N/A	#N/A
		ENSG00000166670	MMP10	-3.03033	0.845274	0.000337044	0.0117437	#N/A	#N/A	#N/A	#N/A
		ENSG00000147065	MSN	-0.702819	0.196135	0.000339222	0.0117587	#N/A	#N/A	#N/A	#N/A
		ENSG00000244575	IGKV1-27	-1.16799	0.325935	0.000339005	0.0117587	#N/A	#N/A	#N/A	#N/A
		ENSG00000122641	INHBA	-2.48676	0.694421	0.00034221	0.0118217	#N/A	#N/A	#N/A	#N/A
		ENSG00000186810	CXCR3	-0.815644	0.227912	0.000345207	0.0118846	#N/A	#N/A	#N/A	#N/A
		ENSG00000163220	S100A9	-2.22572	0.622128	0.000346765	0.011918	#N/A	#N/A	#N/A	#N/A
		ENSG00000129657	SEC14L1	-0.567406	0.158654	0.000348404	0.011943	#N/A	#N/A	#N/A	#N/A
		ENSG00000172575	RASGRP1	-1.10033	0.307685	0.000348675	0.011943	#N/A	#N/A	#N/A	#N/A
		ENSG00000128594	LRRC4	-1.25803	0.351939	0.000350805	0.0119842	#N/A	#N/A	#N/A	#N/A
		ENSG00000142512	SIGLEC10	-0.943142	0.263895	0.000351657	0.0119842	#N/A	#N/A	#N/A	#N/A
		ENSG00000226979	LTA	-1.41377	0.39554	0.000351189	0.0119842	#N/A	#N/A	#N/A	#N/A
		ENSG00000105369	CD79A	-1.04329	0.292109	0.000354831	0.012072	#N/A	#N/A	#N/A	#N/A
		ENSG00000122986	HVCN1	-1.12907	0.316304	0.00035759	0.0121454	#N/A	#N/A	#N/A	#N/A
		ENSG00000170379	TCAF2	-0.897764	0.251661	0.000360602	0.0122067	#N/A	#N/A	#N/A	#N/A
		ENSG00000282639	AC247036.4	-1.4716	0.412637	0.000361998	0.0122335	#N/A	#N/A	#N/A	#N/A
		ENSG00000133561	GIMAP6	-0.505702	0.141889	0.000365136	0.0123189	#N/A	#N/A	#N/A	#N/A
		ENSG00000245648	AC022075.1	-1.27078	0.356647	0.000366467	0.0123432	#N/A	#N/A	#N/A	#N/A
		ENSG00000187862	TTC24	-2.24343	0.63018	0.000370885	0.0124712	#N/A	#N/A	#N/A	#N/A
		ENSG00000196511	TPK1	-0.822697	0.231244	0.000374112	0.012538	#N/A	#N/A	#N/A	#N/A
		ENSG00000242574	HLA-DMB	-0.962345	0.270474	0.000373705	0.012538	#N/A	#N/A	#N/A	#N/A
		ENSG00000119681	LTBP2	-1.05004	0.29519	0.000374878	0.0125429	#N/A	#N/A	#N/A	#N/A
		ENSG00000112096	SOD2	-0.691525	0.194619	0.000380545	0.012628	#N/A	#N/A	#N/A	#N/A
		ENSG00000118473	SGIP1	-1.00785	0.283595	0.000379656	0.012628	#N/A	#N/A	#N/A	#N/A
		ENSG00000169469	SPRR1B	-3.03954	0.855433	0.000380547	0.012628	#N/A	#N/A	#N/A	#N/A
		ENSG00000198821	CD247	-0.810511	0.22807	0.000379721	0.012628	#N/A	#N/A	#N/A	#N/A
		ENSG00000116132	PRRX1	-1.48623	0.418358	0.000381546	0.0126404	#N/A	#N/A	#N/A	#N/A
		ENSG00000179715	PCED1B	-1.10543	0.311316	0.000384033	0.0126812	#N/A	#N/A	#N/A	#N/A
		ENSG00000135148	TRAFD1	-0.575373	0.162089	0.000385617	0.0126921	#N/A	#N/A	#N/A	#N/A
		ENSG00000188848	BEND4	-1.11484	0.314108	0.000386348	0.0126955	#N/A	#N/A	#N/A	#N/A
		ENSG00000265148	TSPOAP1-AS1	-1.00866	0.285154	0.000404296	0.0132422	#N/A	#N/A	#N/A	#N/A
		ENSG00000110777	POU2AF1	-1.04321	0.295167	0.000408822	0.0133687	#N/A	#N/A	#N/A	#N/A
		ENSG00000211951	IGHV2-26	-1.25003	0.353899	0.00041218	0.0134371	#N/A	#N/A	#N/A	#N/A
		ENSG00000011590	ZBTB32	-1.48398	0.420299	0.000414336	0.0134619	#N/A	#N/A	#N/A	#N/A
		ENSG00000211638	IGLV8-61	-1.20274	0.341161	0.000422771	0.0136919	#N/A	#N/A	#N/A	#N/A
		ENSG00000162745	OLFML2B	-1.03088	0.29251	0.000424679	0.0137317	#N/A	#N/A	#N/A	#N/A
		ENSG00000205436	EXOC3L4	-0.78241	0.222049	0.000425732	0.0137438	#N/A	#N/A	#N/A	#N/A
		ENSG00000135046	ANXA1	-1.1833	0.336103	0.000430503	0.0137659	#N/A	#N/A	#N/A	#N/A
		ENSG00000148926	ADM	-0.884505	0.25123	0.000430424	0.0137659	#N/A	#N/A	#N/A	#N/A
		ENSG00000171115	GIMAP8	-0.529846	0.150443	0.000428476	0.0137659	#N/A	#N/A	#N/A	#N/A
		ENSG00000185386	MAPK11	-0.702062	0.199352	0.000428755	0.0137659	#N/A	#N/A	#N/A	#N/A
		ENSG00000211637	IGLV4-69	-1.25179	0.355522	0.000429962	0.0137659	#N/A	#N/A	#N/A	#N/A
		ENSG00000266094	RASSF5	-0.931795	0.264764	0.000432622	0.0138039	#N/A	#N/A	#N/A	#N/A
		ENSG00000100077	GRK3	-0.693533	0.197297	0.000439464	0.0138985	#N/A	#N/A	#N/A	#N/A
		ENSG00000175489	LRRC25	-0.791792	0.225362	0.000442381	0.013949	#N/A	#N/A	#N/A	#N/A
		ENSG00000182162	P2RY8	-1.11086	0.316181	0.000442443	0.013949	#N/A	#N/A	#N/A	#N/A
		ENSG00000112149	CD83	-1.20822	0.3441	0.000446001	0.0140269	#N/A	#N/A	#N/A	#N/A
		ENSG00000132003	ZSWIM4	-0.746984	0.212751	0.000446299	0.0140269	#N/A	#N/A	#N/A	#N/A
		ENSG00000154451	GBP5	-1.77487	0.506064	0.000452859	0.0141669	#N/A	#N/A	#N/A	#N/A
		ENSG00000162398	LEXM	-1.34747	0.384261	0.000453776	0.0141737	#N/A	#N/A	#N/A	#N/A
		ENSG00000229644	NAMPTP1	-0.9491	0.270738	0.000455581	0.0142081	#N/A	#N/A	#N/A	#N/A
		ENSG00000111537	IFNG	-1.88602	0.538151	0.000457239	0.0142378	#N/A	#N/A	#N/A	#N/A
		ENSG00000134061	CD180	-0.990305	0.282824	0.000462671	0.0143031	#N/A	#N/A	#N/A	#N/A
		ENSG00000169442	CD52	-1.10141	0.314443	0.0004605	0.0143031	#N/A	#N/A	#N/A	#N/A
		ENSG00000198774	RASSF9	-0.89481	0.255551	0.000462665	0.0143031	#N/A	#N/A	#N/A	#N/A
		ENSG00000211973	IGHV1-69	-1.23863	0.353757	0.000462876	0.0143031	#N/A	#N/A	#N/A	#N/A
		ENSG00000187513	GJA4	-0.963834	0.275428	0.000466302	0.014387	#N/A	#N/A	#N/A	#N/A
		ENSG00000145623	OSMR	-0.914399	0.261411	0.000468872	0.0144443	#N/A	#N/A	#N/A	#N/A
		ENSG00000106948	AKNA	-0.477441	0.136544	0.000471204	0.014494	#N/A	#N/A	#N/A	#N/A
		ENSG00000213203	GIMAP1	-0.50486	0.144497	0.00047597	0.0146184	#N/A	#N/A	#N/A	#N/A
		ENSG00000188389	PDCD1	-1.39329	0.398888	0.000477714	0.0146497	#N/A	#N/A	#N/A	#N/A
		ENSG00000171552	BCL2L1	-0.413078	0.118309	0.000480299	0.0146844	#N/A	#N/A	#N/A	#N/A
		ENSG00000180263	FGD6	-0.656321	0.188043	0.000482527	0.0147302	#N/A	#N/A	#N/A	#N/A
		ENSG00000096996	IL12RB1	-1.00225	0.287359	0.000487012	0.0148447	#N/A	#N/A	#N/A	#N/A
		ENSG00000132182	NUP210	-0.696798	0.199859	0.000489492	0.0148661	#N/A	#N/A	#N/A	#N/A
		ENSG00000174125	TLR1	-0.936875	0.268737	0.000489921	0.0148661	#N/A	#N/A	#N/A	#N/A
		ENSG00000141298	SSH2	-0.463737	0.133069	0.000492264	0.0149056	#N/A	#N/A	#N/A	#N/A
		ENSG00000213654	GPSM3	-0.730895	0.209766	0.000493348	0.0149056	#N/A	#N/A	#N/A	#N/A
		ENSG00000277734	TRAC	-0.772114	0.221598	0.000493434	0.0149056	#N/A	#N/A	#N/A	#N/A
		ENSG00000153012	LGI2	-1.44992	0.416291	0.000495938	0.0149365	#N/A	#N/A	#N/A	#N/A
		ENSG00000211972	IGHV3-66	-1.24074	0.356843	0.000507074	0.0151814	#N/A	#N/A	#N/A	#N/A
		ENSG00000167711	SERPINF2	-1.08279	0.311646	0.000511968	0.0152827	#N/A	#N/A	#N/A	#N/A
		ENSG00000129474	AJUBA	-0.722313	0.207965	0.000514203	0.0152986	#N/A	#N/A	#N/A	#N/A
		ENSG00000158089	GALNT14	-1.45646	0.41934	0.000514247	0.0152986	#N/A	#N/A	#N/A	#N/A
		ENSG00000173193	PARP14	-0.945925	0.272369	0.000514772	0.0152986	#N/A	#N/A	#N/A	#N/A
		ENSG00000143226	FCGR2A	-0.940025	0.271118	0.000525875	0.0156056	#N/A	#N/A	#N/A	#N/A
		ENSG00000048471	SNX29	-0.52424	0.151334	0.000531943	0.0157164	#N/A	#N/A	#N/A	#N/A
		ENSG00000153395	LPCAT1	-1.05291	0.303934	0.000531707	0.0157164	#N/A	#N/A	#N/A	#N/A
		ENSG00000101017	CD40	-0.987508	0.285129	0.000533451	0.015738	#N/A	#N/A	#N/A	#N/A
		ENSG00000010295	IFFO1	-0.653757	0.188805	0.000534969	0.0157598	#N/A	#N/A	#N/A	#N/A
		ENSG00000169031	COL4A3	-0.931095	0.26915	0.000541394	0.0158891	#N/A	#N/A	#N/A	#N/A
		ENSG00000278869	BX539320.1	-2.13405	0.616915	0.00054172	0.0158891	#N/A	#N/A	#N/A	#N/A
		ENSG00000124508	BTN2A2	-0.821109	0.237591	0.000548296	0.0160355	#N/A	#N/A	#N/A	#N/A
		ENSG00000157404	KIT	-0.707861	0.204804	0.000547685	0.0160355	#N/A	#N/A	#N/A	#N/A
		ENSG00000168032	ENTPD3	-0.839082	0.242902	0.000551507	0.0160989	#N/A	#N/A	#N/A	#N/A
		ENSG00000172243	CLEC7A	-1.16871	0.338352	0.000552057	0.0160989	#N/A	#N/A	#N/A	#N/A
		ENSG00000135365	PHF21A	-0.515147	0.149219	0.000555864	0.0161256	#N/A	#N/A	#N/A	#N/A
		ENSG00000160255	ITGB2	-1.05121	0.304452	0.00055478	0.0161256	#N/A	#N/A	#N/A	#N/A
		ENSG00000163359	COL6A3	-0.945884	0.273999	0.000556165	0.0161256	#N/A	#N/A	#N/A	#N/A
		ENSG00000164520	RAET1E	-1.18869	0.344544	0.000560505	0.0162282	#N/A	#N/A	#N/A	#N/A
		ENSG00000128052	KDR	-0.603367	0.174979	0.000564279	0.0162451	#N/A	#N/A	#N/A	#N/A
		ENSG00000224650	IGHV3-74	-1.04885	0.304134	0.000563404	0.0162451	#N/A	#N/A	#N/A	#N/A
		ENSG00000282508	LINC01002	-0.623729	0.18083	0.000562144	0.0162451	#N/A	#N/A	#N/A	#N/A
		ENSG00000115956	PLEK	-1.23963	0.359847	0.000571317	0.0163388	#N/A	#N/A	#N/A	#N/A
		ENSG00000124243	BCAS4	-0.821531	0.238446	0.000570326	0.0163388	#N/A	#N/A	#N/A	#N/A
		ENSG00000168421	RHOH	-1.13266	0.328807	0.000571603	0.0163388	#N/A	#N/A	#N/A	#N/A
		ENSG00000211734	TRBV5-1	-1.27248	0.369383	0.000571332	0.0163388	#N/A	#N/A	#N/A	#N/A
		ENSG00000172965	MIR4435-2HG	-0.794791	0.230935	0.000578239	0.0164819	#N/A	#N/A	#N/A	#N/A
		ENSG00000090924	PLEKHG2	-0.871739	0.253338	0.000579538	0.0164956	#N/A	#N/A	#N/A	#N/A
		ENSG00000106952	TNFSF8	-1.22263	0.355502	0.00058353	0.0165859	#N/A	#N/A	#N/A	#N/A
		ENSG00000180353	HCLS1	-0.870017	0.253025	0.000585025	0.016605	#N/A	#N/A	#N/A	#N/A
		ENSG00000241351	IGKV3-11	-1.15976	0.337337	0.000586043	0.0166106	#N/A	#N/A	#N/A	#N/A
		ENSG00000150867	PIP4K2A	-0.587151	0.170932	0.000592546	0.0167474	#N/A	#N/A	#N/A	#N/A
		ENSG00000109943	CRTAM	-1.26774	0.369197	0.000595214	0.0167716	#N/A	#N/A	#N/A	#N/A
		ENSG00000132274	TRIM22	-0.960428	0.279793	0.000597742	0.0167716	#N/A	#N/A	#N/A	#N/A
		ENSG00000166289	PLEKHF1	-0.77859	0.226838	0.000598362	0.0167716	#N/A	#N/A	#N/A	#N/A
		ENSG00000074660	SCARF1	-0.638481	0.186045	0.000599462	0.0167791	#N/A	#N/A	#N/A	#N/A
		ENSG00000121895	TMEM156	-1.09135	0.318099	0.000601655	0.0168086	#N/A	#N/A	#N/A	#N/A
		ENSG00000182492	BGN	-1.23148	0.358965	0.00060218	0.0168086	#N/A	#N/A	#N/A	#N/A
		ENSG00000068724	TTC7A	-0.351912	0.102633	0.000606148	0.0168961	#N/A	#N/A	#N/A	#N/A
		ENSG00000178562	CD28	-1.20918	0.352716	0.000607587	0.0169129	#N/A	#N/A	#N/A	#N/A
		ENSG00000152804	HHEX	-0.791672	0.230981	0.000609327	0.016938	#N/A	#N/A	#N/A	#N/A
		ENSG00000013016	EHD3	-0.968799	0.282796	0.000613016	0.0169473	#N/A	#N/A	#N/A	#N/A
		ENSG00000074706	IPCEF1	-0.865653	0.252679	0.000612756	0.0169473	#N/A	#N/A	#N/A	#N/A
		ENSG00000250910	AC097467.3	-2.66806	0.778772	0.000612591	0.0169473	#N/A	#N/A	#N/A	#N/A
		ENSG00000113319	RASGRF2	-0.557976	0.163031	0.00062046	0.0170386	#N/A	#N/A	#N/A	#N/A
		ENSG00000115221	ITGB6	-0.863373	0.252203	0.000618607	0.0170386	#N/A	#N/A	#N/A	#N/A
		ENSG00000137857	DUOX1	-1.15145	0.336473	0.000621378	0.0170386	#N/A	#N/A	#N/A	#N/A
		ENSG00000254109	RBPMS-AS1	-2.31702	0.677011	0.000620653	0.0170386	#N/A	#N/A	#N/A	#N/A
		ENSG00000261218	AC099524.1	-1.8822	0.550424	0.00062728	0.0171307	#N/A	#N/A	#N/A	#N/A
		ENSG00000125848	FLRT3	-1.11222	0.325761	0.00063967	0.0174219	#N/A	#N/A	#N/A	#N/A
		ENSG00000137757	CASP5	-1.15898	0.339639	0.000643973	0.017492	#N/A	#N/A	#N/A	#N/A
		ENSG00000010030	ETV7	-1.02595	0.300928	0.000651335	0.0176445	#N/A	#N/A	#N/A	#N/A
		ENSG00000163817	SLC6A20	-1.76594	0.518516	0.000659794	0.0178259	#N/A	#N/A	#N/A	#N/A
		ENSG00000204277	LINC01993	-2.74214	0.805065	0.000658949	0.0178259	#N/A	#N/A	#N/A	#N/A
		ENSG00000099985	OSM	-2.50863	0.737279	0.000667593	0.0180125	#N/A	#N/A	#N/A	#N/A
		ENSG00000070882	OSBPL3	-0.596389	0.175342	0.000670686	0.0180478	#N/A	#N/A	#N/A	#N/A
		ENSG00000213658	LAT	-0.910577	0.267714	0.00067064	0.0180478	#N/A	#N/A	#N/A	#N/A
		ENSG00000029534	ANK1	-1.20217	0.353563	0.000673499	0.0180994	#N/A	#N/A	#N/A	#N/A
		ENSG00000187116	LILRA5	-1.31008	0.385408	0.000675807	0.0181373	#N/A	#N/A	#N/A	#N/A
		ENSG00000066294	CD84	-1.03007	0.303089	0.000677339	0.01815	#N/A	#N/A	#N/A	#N/A
		ENSG00000140511	HAPLN3	-1.75546	0.51657	0.000678078	0.01815	#N/A	#N/A	#N/A	#N/A
		ENSG00000205846	CLEC6A	-2.48063	0.730106	0.000679732	0.0181702	#N/A	#N/A	#N/A	#N/A
		ENSG00000198535	C2CD4A	-1.81298	0.534078	0.000687297	0.018324	#N/A	#N/A	#N/A	#N/A
		ENSG00000165168	CYBB	-1.03343	0.304511	0.000689474	0.0183337	#N/A	#N/A	#N/A	#N/A
		ENSG00000105989	WNT2	-4.72569	1.39282	0.000691611	0.0183663	#N/A	#N/A	#N/A	#N/A
		ENSG00000015413	DPEP1	-1.17498	0.346454	0.000695244	0.0184144	#N/A	#N/A	#N/A	#N/A
		ENSG00000092067	CEBPE	-1.69737	0.500571	0.000696721	0.0184294	#N/A	#N/A	#N/A	#N/A
		ENSG00000211938	IGHV3-7	-1.14875	0.339247	0.000708707	0.0186975	#N/A	#N/A	#N/A	#N/A
		ENSG00000117090	SLAMF1	-0.913842	0.269907	0.000709788	0.0187016	#N/A	#N/A	#N/A	#N/A
		ENSG00000130813	C19orf66	-0.520843	0.153868	0.000711762	0.0187292	#N/A	#N/A	#N/A	#N/A
		ENSG00000178927	C17orf62	-0.485332	0.143478	0.000717956	0.0188676	#N/A	#N/A	#N/A	#N/A
		ENSG00000198759	EGFL6	-1.88466	0.557403	0.000721848	0.018904	#N/A	#N/A	#N/A	#N/A
		ENSG00000198885	ITPRIPL1	-0.931508	0.275487	0.000721398	0.018904	#N/A	#N/A	#N/A	#N/A
		ENSG00000239713	APOBEC3G	-0.995385	0.294549	0.000726564	0.018946	#N/A	#N/A	#N/A	#N/A
		ENSG00000268027	AC243960.1	-1.12851	0.333906	0.000725582	0.018946	#N/A	#N/A	#N/A	#N/A
		ENSG00000221947	XKR9	-1.1597	0.343256	0.00072875	0.0189541	#N/A	#N/A	#N/A	#N/A
		ENSG00000146192	FGD2	-0.81852	0.2424	0.000733517	0.0190535	#N/A	#N/A	#N/A	#N/A
		ENSG00000160117	ANKLE1	-1.40367	0.415839	0.000736759	0.0191132	#N/A	#N/A	#N/A	#N/A
		ENSG00000008083	JARID2	-0.345023	0.10229	0.000743533	0.0191904	#N/A	#N/A	#N/A	#N/A
		ENSG00000096088	PGC	-2.59531	0.769593	0.0007454	0.019214	#N/A	#N/A	#N/A	#N/A
		ENSG00000023892	DEF6	-0.540038	0.160371	0.000758729	0.0195327	#N/A	#N/A	#N/A	#N/A
		ENSG00000128512	DOCK4	-0.646975	0.192217	0.000763074	0.0196196	#N/A	#N/A	#N/A	#N/A
		ENSG00000112137	PHACTR1	-0.949156	0.282126	0.000767379	0.0197052	#N/A	#N/A	#N/A	#N/A
		ENSG00000167613	LAIR1	-0.608955	0.181026	0.000768476	0.0197083	#N/A	#N/A	#N/A	#N/A
		ENSG00000100427	MLC1	-1.38639	0.412368	0.000773737	0.019818	#N/A	#N/A	#N/A	#N/A
		ENSG00000253882	AC099548.2	-0.708422	0.210895	0.000781902	0.0199766	#N/A	#N/A	#N/A	#N/A
		ENSG00000185338	SOCS1	-1.40189	0.417394	0.000783156	0.0199833	#N/A	#N/A	#N/A	#N/A
		ENSG00000101916	TLR8	-1.15545	0.344224	0.000788838	0.0200776	#N/A	#N/A	#N/A	#N/A
		ENSG00000008516	MMP25	-0.907659	0.270458	0.000790749	0.0201009	#N/A	#N/A	#N/A	#N/A
		ENSG00000119917	IFIT3	-1.05196	0.313565	0.000794144	0.0201366	#N/A	#N/A	#N/A	#N/A
		ENSG00000211772	TRBC2	-0.851127	0.254133	0.000810636	0.0204521	#N/A	#N/A	#N/A	#N/A
		ENSG00000019186	CYP24A1	-3.38429	1.01084	0.000813944	0.02051	#N/A	#N/A	#N/A	#N/A
		ENSG00000170819	BFSP2	-1.85032	0.55277	0.000815844	0.0205322	#N/A	#N/A	#N/A	#N/A
		ENSG00000109684	CLNK	-1.04914	0.313867	0.000829864	0.0207689	#N/A	#N/A	#N/A	#N/A
		ENSG00000162511	LAPTM5	-0.752591	0.22507	0.000826368	0.0207689	#N/A	#N/A	#N/A	#N/A
		ENSG00000163568	AIM2	-1.20117	0.359367	0.000830386	0.0207689	#N/A	#N/A	#N/A	#N/A
		ENSG00000160883	HK3	-1.18362	0.354173	0.000832001	0.0207836	#N/A	#N/A	#N/A	#N/A
		ENSG00000028137	TNFRSF1B	-0.537644	0.160946	0.000836208	0.0208173	#N/A	#N/A	#N/A	#N/A
		ENSG00000164485	IL22RA2	-1.95806	0.586168	0.000836442	0.0208173	#N/A	#N/A	#N/A	#N/A
		ENSG00000173706	HEG1	-0.615227	0.184148	0.000834945	0.0208173	#N/A	#N/A	#N/A	#N/A
		ENSG00000116497	S100PBP	-0.525103	0.157364	0.000847305	0.0209586	#N/A	#N/A	#N/A	#N/A
		ENSG00000197872	FAM49A	-0.998539	0.299198	0.000845698	0.0209586	#N/A	#N/A	#N/A	#N/A
		ENSG00000261618	AC083837.1	-1.2443	0.372873	0.000846719	0.0209586	#N/A	#N/A	#N/A	#N/A
		ENSG00000258227	CLEC5A	-1.47424	0.441969	0.00085107	0.021026	#N/A	#N/A	#N/A	#N/A
		ENSG00000185215	TNFAIP2	-1.01817	0.305303	0.00085318	0.0210524	#N/A	#N/A	#N/A	#N/A
		ENSG00000106991	ENG	-0.60075	0.180162	0.00085456	0.0210607	#N/A	#N/A	#N/A	#N/A
		ENSG00000211665	IGLV3-16	-1.49299	0.448681	0.000876262	0.0214647	#N/A	#N/A	#N/A	#N/A
		ENSG00000142102	PGGHG	-0.440345	0.132397	0.000881157	0.0215064	#N/A	#N/A	#N/A	#N/A
		ENSG00000117009	KMO	-1.32853	0.399663	0.000886928	0.0216212	#N/A	#N/A	#N/A	#N/A
		ENSG00000169855	ROBO1	-0.844182	0.25409	0.000892543	0.0217057	#N/A	#N/A	#N/A	#N/A
		ENSG00000261971	MMP25-AS1	-0.682925	0.205584	0.000894124	0.021718	#N/A	#N/A	#N/A	#N/A
		ENSG00000279369	AC046185.3	-1.10641	0.333134	0.000896249	0.0217435	#N/A	#N/A	#N/A	#N/A
		ENSG00000162493	PDPN	-1.23702	0.372583	0.000899766	0.02176	#N/A	#N/A	#N/A	#N/A
		ENSG00000198771	RCSD1	-0.647995	0.195179	0.000900161	0.02176	#N/A	#N/A	#N/A	#N/A
		ENSG00000068650	ATP11A	-0.654617	0.197214	0.000902344	0.0217867	#N/A	#N/A	#N/A	#N/A
		ENSG00000254750	CASP1P2	-2.54351	0.766509	0.000905645	0.0218403	#N/A	#N/A	#N/A	#N/A
		ENSG00000065413	ANKRD44	-1.09452	0.33005	0.000912409	0.0219772	#N/A	#N/A	#N/A	#N/A
		ENSG00000185245	GP1BA	-1.68427	0.508017	0.000915162	0.0220173	#N/A	#N/A	#N/A	#N/A
		ENSG00000187908	DMBT1	-2.13527	0.644265	0.000918808	0.0220787	#N/A	#N/A	#N/A	#N/A
		ENSG00000170989	S1PR1	-0.765874	0.231116	0.000920327	0.0220888	#N/A	#N/A	#N/A	#N/A
		ENSG00000026950	BTN3A1	-0.694423	0.209601	0.000922754	0.0220947	#N/A	#N/A	#N/A	#N/A
		ENSG00000179344	HLA-DQB1	-0.882144	0.266399	0.000928405	0.0221932	#N/A	#N/A	#N/A	#N/A
		ENSG00000087266	SH3BP2	-0.444451	0.134338	0.000938122	0.0223304	#N/A	#N/A	#N/A	#N/A
		ENSG00000103653	CSK	-0.319604	0.0965927	0.000937027	0.0223304	#N/A	#N/A	#N/A	#N/A
		ENSG00000211799	TRAV19	-1.29183	0.390448	0.00093768	0.0223304	#N/A	#N/A	#N/A	#N/A
		ENSG00000109790	KLHL5	-0.975638	0.294981	0.000941456	0.0223571	#N/A	#N/A	#N/A	#N/A
		ENSG00000092345	DAZL	-3.58383	1.08381	0.000944037	0.0223658	#N/A	#N/A	#N/A	#N/A
		ENSG00000111701	APOBEC1	-1.43242	0.433156	0.00094324	0.0223658	#N/A	#N/A	#N/A	#N/A
		ENSG00000171681	ATF7IP	-0.427765	0.129385	0.000945907	0.0223839	#N/A	#N/A	#N/A	#N/A
		ENSG00000061273	HDAC7	-0.544734	0.164869	0.000952997	0.0225253	#N/A	#N/A	#N/A	#N/A
		ENSG00000143515	ATP8B2	-0.695121	0.21048	0.000958093	0.0226193	#N/A	#N/A	#N/A	#N/A
		ENSG00000158477	CD1A	-1.74745	0.529385	0.000963755	0.0226999	#N/A	#N/A	#N/A	#N/A
		ENSG00000172322	CLEC12A	-1.11691	0.338364	0.000963688	0.0226999	#N/A	#N/A	#N/A	#N/A
		ENSG00000066405	CLDN18	-1.7486	0.52985	0.00096622	0.0227315	#N/A	#N/A	#N/A	#N/A
		ENSG00000135899	SP110	-0.787772	0.238791	0.000970287	0.0227635	#N/A	#N/A	#N/A	#N/A
		ENSG00000224660	SH3BP5-AS1	-0.434859	0.131823	0.000970958	0.0227635	#N/A	#N/A	#N/A	#N/A
		ENSG00000238133	MAP3K20-AS1	-1.85435	0.562114	0.000970675	0.0227635	#N/A	#N/A	#N/A	#N/A
		ENSG00000160185	UBASH3A	-0.821269	0.249205	0.000982275	0.0230021	#N/A	#N/A	#N/A	#N/A
		ENSG00000131196	NFATC1	-0.758751	0.230665	0.00100398	0.023456	#N/A	#N/A	#N/A	#N/A
		ENSG00000231437	LINC01750	-1.82093	0.553526	0.001003	0.023456	#N/A	#N/A	#N/A	#N/A
		ENSG00000183484	GPR132	-1.11712	0.33972	0.00100778	0.0235176	#N/A	#N/A	#N/A	#N/A
		ENSG00000094755	GABRP	-1.32357	0.402892	0.00101919	0.0237016	#N/A	#N/A	#N/A	#N/A
		ENSG00000176485	PLA2G16	-0.887669	0.270291	0.00102298	0.0237626	#N/A	#N/A	#N/A	#N/A
		ENSG00000071246	VASH1	-0.666887	0.203252	0.00103407	0.0239102	#N/A	#N/A	#N/A	#N/A
		ENSG00000089723	OTUB2	-0.666512	0.203131	0.0010337	0.0239102	#N/A	#N/A	#N/A	#N/A
		ENSG00000110799	VWF	-0.832472	0.253713	0.00103383	0.0239102	#N/A	#N/A	#N/A	#N/A
		ENSG00000123684	LPGAT1	-0.736619	0.224584	0.00103835	0.0239817	#N/A	#N/A	#N/A	#N/A
		ENSG00000197249	SERPINA1	-0.467387	0.142574	0.00104469	0.0241006	#N/A	#N/A	#N/A	#N/A
		ENSG00000105287	PRKD2	-0.328407	0.100288	0.00105797	0.0243792	#N/A	#N/A	#N/A	#N/A
		ENSG00000205045	SLFN12L	-1.03103	0.315081	0.00106683	0.0245554	#N/A	#N/A	#N/A	#N/A
		ENSG00000007933	FMO3	-1.56789	0.479541	0.00107709	0.0247092	#N/A	#N/A	#N/A	#N/A
		ENSG00000179144	GIMAP7	-0.577157	0.176677	0.00108796	0.0249282	#N/A	#N/A	#N/A	#N/A
		ENSG00000105808	RASA4	-0.436233	0.133577	0.00109163	0.0249667	#N/A	#N/A	#N/A	#N/A
		ENSG00000147697	GSDMC	-1.84366	0.56467	0.00109458	0.0249667	#N/A	#N/A	#N/A	#N/A
		ENSG00000204257	HLA-DMA	-0.799046	0.244685	0.00109227	0.0249667	#N/A	#N/A	#N/A	#N/A
		ENSG00000240671	IGKV1-8	-1.06209	0.325272	0.00109371	0.0249667	#N/A	#N/A	#N/A	#N/A
		ENSG00000128262	POM121L9P	-1.17478	0.360009	0.00110167	0.0250548	#N/A	#N/A	#N/A	#N/A
		ENSG00000180739	S1PR5	-1.54851	0.474557	0.00110217	0.0250548	#N/A	#N/A	#N/A	#N/A
		ENSG00000237604	AP001056.1	-1.12715	0.345395	0.00110103	0.0250548	#N/A	#N/A	#N/A	#N/A
		ENSG00000090339	ICAM1	-1.08078	0.331305	0.00110562	0.025105	#N/A	#N/A	#N/A	#N/A
		ENSG00000211666	IGLV2-14	-1.14381	0.350681	0.0011075	0.0251194	#N/A	#N/A	#N/A	#N/A
		ENSG00000164236	ANKRD33B	-0.771506	0.236608	0.00111142	0.0251802	#N/A	#N/A	#N/A	#N/A
		ENSG00000118308	LRMP	-0.675617	0.207294	0.00111718	0.0252224	#N/A	#N/A	#N/A	#N/A
		ENSG00000165071	TMEM71	-0.825751	0.253339	0.00111619	0.0252224	#N/A	#N/A	#N/A	#N/A
		ENSG00000213626	LBH	-0.717094	0.220039	0.00111828	0.0252224	#N/A	#N/A	#N/A	#N/A
		ENSG00000060558	GNA15	-1.05328	0.323299	0.00112231	0.0252465	#N/A	#N/A	#N/A	#N/A
		ENSG00000125810	CD93	-0.62544	0.191978	0.00112247	0.0252465	#N/A	#N/A	#N/A	#N/A
		ENSG00000070190	DAPP1	-0.869525	0.267016	0.00112814	0.0253035	#N/A	#N/A	#N/A	#N/A
		ENSG00000103222	ABCC1	-0.572663	0.175841	0.00112715	0.0253035	#N/A	#N/A	#N/A	#N/A
		ENSG00000161929	SCIMP	-1.19583	0.367364	0.00113325	0.0253901	#N/A	#N/A	#N/A	#N/A
		ENSG00000172867	KRT2	-1.66612	0.51192	0.00113528	0.0254074	#N/A	#N/A	#N/A	#N/A
		ENSG00000180448	ARHGAP45	-0.500518	0.153945	0.00114891	0.0256556	#N/A	#N/A	#N/A	#N/A
		ENSG00000041982	TNC	-0.789693	0.243133	0.00116225	0.0258678	#N/A	#N/A	#N/A	#N/A
		ENSG00000083799	CYLD	-0.612076	0.188447	0.00116219	0.0258678	#N/A	#N/A	#N/A	#N/A
		ENSG00000115008	IL1A	-2.03047	0.625616	0.00117221	0.0260606	#N/A	#N/A	#N/A	#N/A
		ENSG00000283267	FAM237B	-3.83788	1.1836	0.00118461	0.0262498	#N/A	#N/A	#N/A	#N/A
		ENSG00000086300	SNX10	-1.27975	0.395326	0.00120704	0.0266796	#N/A	#N/A	#N/A	#N/A
		ENSG00000258168	AC025569.1	-1.15199	0.355882	0.00120797	0.0266796	#N/A	#N/A	#N/A	#N/A
		ENSG00000273079	GRIN2B	-1.04148	0.321782	0.00120962	0.0266869	#N/A	#N/A	#N/A	#N/A
		ENSG00000181690	PLAG1	-0.938339	0.289971	0.00121228	0.0267163	#N/A	#N/A	#N/A	#N/A
		ENSG00000147251	DOCK11	-0.66503	0.205551	0.00121495	0.026746	#N/A	#N/A	#N/A	#N/A
		ENSG00000259807	AC009093.1	-2.2972	0.710683	0.00122761	0.0269661	#N/A	#N/A	#N/A	#N/A
		ENSG00000179241	LDLRAD3	-0.983505	0.304326	0.00123034	0.0269967	#N/A	#N/A	#N/A	#N/A
		ENSG00000090376	IRAK3	-0.784073	0.242711	0.00123581	0.0270627	#N/A	#N/A	#N/A	#N/A
		ENSG00000171310	CHST11	-0.910917	0.282006	0.00123732	0.0270627	#N/A	#N/A	#N/A	#N/A
		ENSG00000124391	IL17C	-2.70796	0.838458	0.00123923	0.0270742	#N/A	#N/A	#N/A	#N/A
		ENSG00000253522	MIR3142HG	-0.836062	0.258924	0.0012423	0.027112	#N/A	#N/A	#N/A	#N/A
		ENSG00000146215	CRIP3	-1.40898	0.43646	0.00124571	0.0271278	#N/A	#N/A	#N/A	#N/A
		ENSG00000164379	FOXQ1	-1.28868	0.399191	0.00124554	0.0271278	#N/A	#N/A	#N/A	#N/A
		ENSG00000175065	DSG4	-1.04704	0.324492	0.00125228	0.0272416	#N/A	#N/A	#N/A	#N/A
		ENSG00000088882	CPXM1	-1.20574	0.374033	0.00126583	0.0274477	#N/A	#N/A	#N/A	#N/A
		ENSG00000133789	SWAP70	-0.687734	0.213448	0.00127291	0.0275125	#N/A	#N/A	#N/A	#N/A
		ENSG00000160013	PTGIR	-0.881565	0.273601	0.0012726	0.0275125	#N/A	#N/A	#N/A	#N/A
		ENSG00000181215	C4orf50	-3.18676	0.988869	0.0012702	0.0275125	#N/A	#N/A	#N/A	#N/A
		ENSG00000115604	IL18R1	-0.770548	0.2392	0.00127589	0.0275373	#N/A	#N/A	#N/A	#N/A
		ENSG00000196209	SIRPB2	-1.00337	0.311493	0.00127678	0.0275373	#N/A	#N/A	#N/A	#N/A
		ENSG00000100985	MMP9	-1.88141	0.584286	0.00128185	0.0276173	#N/A	#N/A	#N/A	#N/A
		ENSG00000010810	FYN	-0.64914	0.201629	0.00128424	0.0276391	#N/A	#N/A	#N/A	#N/A
		ENSG00000066230	SLC9A3	-1.14227	0.354946	0.00129021	0.0277058	#N/A	#N/A	#N/A	#N/A
		ENSG00000129988	LBP	-3.34167	1.03864	0.00129379	0.0277266	#N/A	#N/A	#N/A	#N/A
		ENSG00000163638	ADAMTS9	-0.805638	0.25053	0.00130113	0.0278248	#N/A	#N/A	#N/A	#N/A
		ENSG00000270472	IGHV3OR16-9	-2.44881	0.76164	0.0013036	0.0278482	#N/A	#N/A	#N/A	#N/A
		ENSG00000211792	TRAV14DV4	-1.86786	0.581244	0.001311	0.0279473	#N/A	#N/A	#N/A	#N/A
		ENSG00000174004	NRROS	-0.816166	0.254084	0.00131725	0.0280509	#N/A	#N/A	#N/A	#N/A
		ENSG00000181652	ATG9B	-1.5433	0.480581	0.00132127	0.0281069	#N/A	#N/A	#N/A	#N/A
		ENSG00000132746	ALDH3B2	-1.86428	0.580789	0.00132778	0.0282158	#N/A	#N/A	#N/A	#N/A
		ENSG00000100351	GRAP2	-0.598912	0.186702	0.00133728	0.0283579	#N/A	#N/A	#N/A	#N/A
		ENSG00000198879	SFMBT2	-0.727218	0.226685	0.00133637	0.0283579	#N/A	#N/A	#N/A	#N/A
		ENSG00000241163	LINC00877	-1.53042	0.477188	0.00134054	0.0283973	#N/A	#N/A	#N/A	#N/A
		ENSG00000067057	PFKP	-0.507032	0.15817	0.0013477	0.0284891	#N/A	#N/A	#N/A	#N/A
		ENSG00000104903	LYL1	-0.864001	0.269791	0.00136248	0.0287714	#N/A	#N/A	#N/A	#N/A
		ENSG00000102359	SRPX2	-0.835897	0.261148	0.00137019	0.0289041	#N/A	#N/A	#N/A	#N/A
		ENSG00000065308	TRAM2	-0.438175	0.137043	0.00138694	0.0291453	#N/A	#N/A	#N/A	#N/A
		ENSG00000241717	VWFP1	-1.34237	0.420068	0.00139541	0.0292227	#N/A	#N/A	#N/A	#N/A
		ENSG00000091137	SLC26A4	-1.71722	0.537779	0.00140719	0.029378	#N/A	#N/A	#N/A	#N/A
		ENSG00000054967	RELT	-0.83215	0.260652	0.00141011	0.0294085	#N/A	#N/A	#N/A	#N/A
		ENSG00000204577	LILRB3	-1.23367	0.386513	0.00141392	0.0294576	#N/A	#N/A	#N/A	#N/A
		ENSG00000073861	TBX21	-0.933021	0.292619	0.00143002	0.0297625	#N/A	#N/A	#N/A	#N/A
		ENSG00000184374	COLEC10	-1.36707	0.42885	0.00143382	0.0298049	#N/A	#N/A	#N/A	#N/A
		ENSG00000125347	IRF1	-0.657089	0.206258	0.00144375	0.0298773	#N/A	#N/A	#N/A	#N/A
		ENSG00000132185	FCRLA	-1.3428	0.421519	0.00144438	0.0298773	#N/A	#N/A	#N/A	#N/A
		ENSG00000185201	IFITM2	-0.79156	0.248473	0.00144406	0.0298773	#N/A	#N/A	#N/A	#N/A
		ENSG00000197535	MYO5A	-0.64551	0.202632	0.00144441	0.0298773	#N/A	#N/A	#N/A	#N/A
		ENSG00000141068	KSR1	-0.525788	0.165103	0.00144956	0.0299532	#N/A	#N/A	#N/A	#N/A
		ENSG00000080573	COL5A3	-0.858976	0.269856	0.00145714	0.0300791	#N/A	#N/A	#N/A	#N/A
		ENSG00000198959	TGM2	-1.74749	0.549341	0.00146734	0.0301663	#N/A	#N/A	#N/A	#N/A
		ENSG00000238121	LINC00426	-0.90032	0.28302	0.00146708	0.0301663	#N/A	#N/A	#N/A	#N/A
		ENSG00000281990	AC245369.4	-1.56329	0.491394	0.001466	0.0301663	#N/A	#N/A	#N/A	#N/A
		ENSG00000259772	AC012236.1	-1.03385	0.325276	0.00148101	0.0303546	#N/A	#N/A	#N/A	#N/A
		ENSG00000179934	CCR8	-1.91423	0.602406	0.00148482	0.0303561	#N/A	#N/A	#N/A	#N/A
		ENSG00000234518	PTGES3P1	-0.786049	0.247381	0.00148558	0.0303561	#N/A	#N/A	#N/A	#N/A
		ENSG00000184454	NCMAP	-0.456882	0.143803	0.00148733	0.030361	#N/A	#N/A	#N/A	#N/A
		ENSG00000168404	MLKL	-0.419207	0.132005	0.00149476	0.0304512	#N/A	#N/A	#N/A	#N/A
		ENSG00000188820	FAM26F	-1.20812	0.380413	0.00149416	0.0304512	#N/A	#N/A	#N/A	#N/A
		ENSG00000100647	SUSD6	-0.426729	0.134393	0.00149715	0.0304691	#N/A	#N/A	#N/A	#N/A
		ENSG00000137868	STRA6	-1.99598	0.628679	0.00149899	0.0304759	#N/A	#N/A	#N/A	#N/A
		ENSG00000175115	PACS1	-0.64584	0.203611	0.00151424	0.0307252	#N/A	#N/A	#N/A	#N/A
		ENSG00000106560	GIMAP2	-0.69165	0.218236	0.00152816	0.0309369	#N/A	#N/A	#N/A	#N/A
		ENSG00000167286	CD3D	-0.892347	0.281581	0.00152931	0.0309369	#N/A	#N/A	#N/A	#N/A
		ENSG00000175426	PCSK1	-0.909779	0.28712	0.00153155	0.0309511	#N/A	#N/A	#N/A	#N/A
		ENSG00000187323	DCC	-1.95014	0.615738	0.00153935	0.0310777	#N/A	#N/A	#N/A	#N/A
		ENSG00000138496	PARP9	-0.880581	0.278121	0.00154459	0.0311212	#N/A	#N/A	#N/A	#N/A
		ENSG00000103888	CEMIP	-1.11325	0.351886	0.00155789	0.0313267	#N/A	#N/A	#N/A	#N/A
		ENSG00000169896	ITGAM	-0.741727	0.234507	0.00156192	0.0313766	#N/A	#N/A	#N/A	#N/A
		ENSG00000266709	AC005224.4	-1.38589	0.438408	0.00157124	0.0315325	#N/A	#N/A	#N/A	#N/A
		ENSG00000163032	VSNL1	-0.821898	0.260061	0.00157551	0.0315869	#N/A	#N/A	#N/A	#N/A
		ENSG00000156219	ART3	-1.25588	0.39776	0.001592	0.0318542	#N/A	#N/A	#N/A	#N/A
		ENSG00000180539	C9orf139	-1.188	0.376372	0.00159698	0.0318983	#N/A	#N/A	#N/A	#N/A
		ENSG00000261786	AC006058.1	-1.54992	0.491349	0.00160814	0.0320186	#N/A	#N/A	#N/A	#N/A
		ENSG00000111886	GABRR2	-1.13238	0.359089	0.00161339	0.0320599	#N/A	#N/A	#N/A	#N/A
		ENSG00000134317	GRHL1	-0.968697	0.307178	0.00161303	0.0320599	#N/A	#N/A	#N/A	#N/A
		ENSG00000134013	LOXL2	-0.693751	0.220047	0.00161744	0.0321088	#N/A	#N/A	#N/A	#N/A
		ENSG00000078900	TP73	-1.11909	0.355073	0.00162316	0.0321592	#N/A	#N/A	#N/A	#N/A
		ENSG00000211652	IGLV7-43	-1.20723	0.383033	0.00162278	0.0321592	#N/A	#N/A	#N/A	#N/A
		ENSG00000204304	PBX2	-0.293856	0.0933278	0.00164031	0.0324601	#N/A	#N/A	#N/A	#N/A
		ENSG00000233901	LINC01503	-1.13983	0.36217	0.00164827	0.032561	#N/A	#N/A	#N/A	#N/A
		ENSG00000136205	TNS3	-0.269489	0.085637	0.00165022	0.0325677	#N/A	#N/A	#N/A	#N/A
		ENSG00000281103	TRG-AS1	-0.834438	0.265226	0.00165443	0.0325871	#N/A	#N/A	#N/A	#N/A
		ENSG00000115461	IGFBP5	-0.962823	0.306147	0.00166106	0.0326223	#N/A	#N/A	#N/A	#N/A
		ENSG00000145416	MARCH1	-0.776527	0.246949	0.00166379	0.0326442	#N/A	#N/A	#N/A	#N/A
		ENSG00000111348	ARHGDIB	-0.771493	0.245373	0.00166563	0.0326487	#N/A	#N/A	#N/A	#N/A
		ENSG00000223806	LINC00114	-1.40866	0.448127	0.00166973	0.0326973	#N/A	#N/A	#N/A	#N/A
		ENSG00000184489	PTP4A3	-0.847103	0.269719	0.00168553	0.0329423	#N/A	#N/A	#N/A	#N/A
		ENSG00000198829	SUCNR1	-1.31687	0.41933	0.00168713	0.0329423	#N/A	#N/A	#N/A	#N/A
		ENSG00000183741	CBX6	-0.498096	0.158672	0.00169436	0.0330514	#N/A	#N/A	#N/A	#N/A
		ENSG00000172116	CD8B	-0.517351	0.164919	0.00170692	0.0332644	#N/A	#N/A	#N/A	#N/A
		ENSG00000115165	CYTIP	-1.01744	0.324381	0.00170943	0.0332813	#N/A	#N/A	#N/A	#N/A
		ENSG00000232613	AC007386.2	-1.21532	0.387553	0.00171331	0.0333246	#N/A	#N/A	#N/A	#N/A
		ENSG00000108244	KRT23	-1.40051	0.446836	0.00172282	0.0334132	#N/A	#N/A	#N/A	#N/A
		ENSG00000279286	AL133373.2	-1.71226	0.546291	0.00172239	0.0334132	#N/A	#N/A	#N/A	#N/A
		ENSG00000111335	OAS2	-0.996314	0.317969	0.00172815	0.0334844	#N/A	#N/A	#N/A	#N/A
		ENSG00000150681	RGS18	-0.874943	0.279307	0.00173297	0.0335455	#N/A	#N/A	#N/A	#N/A
		ENSG00000213445	SIPA1	-0.586394	0.187234	0.0017369	0.0335754	#N/A	#N/A	#N/A	#N/A
		ENSG00000086730	LAT2	-0.719445	0.229838	0.00174667	0.0336496	#N/A	#N/A	#N/A	#N/A
		ENSG00000182022	CHST15	-0.893432	0.285398	0.00174521	0.0336496	#N/A	#N/A	#N/A	#N/A
		ENSG00000260244	AC104083.1	-0.970801	0.310088	0.00174373	0.0336496	#N/A	#N/A	#N/A	#N/A
		ENSG00000230606	AC092683.1	-0.632419	0.202064	0.00174928	0.0336678	#N/A	#N/A	#N/A	#N/A
		ENSG00000161798	AQP5	-2.18054	0.696799	0.00175186	0.0336854	#N/A	#N/A	#N/A	#N/A
		ENSG00000143390	RFX5	-0.63174	0.20205	0.00176805	0.0339	#N/A	#N/A	#N/A	#N/A
		ENSG00000157350	ST3GAL2	-0.721756	0.230803	0.00176508	0.0339	#N/A	#N/A	#N/A	#N/A
		ENSG00000211947	IGHV3-21	-1.1279	0.36073	0.00176769	0.0339	#N/A	#N/A	#N/A	#N/A
		ENSG00000143702	CEP170	-0.661864	0.211784	0.00177689	0.0340371	#N/A	#N/A	#N/A	#N/A
		ENSG00000187498	COL4A1	-0.876954	0.280692	0.00178253	0.0341129	#N/A	#N/A	#N/A	#N/A
		ENSG00000178764	ZHX2	-0.501623	0.160664	0.0017951	0.0343209	#N/A	#N/A	#N/A	#N/A
		ENSG00000114019	AMOTL2	-0.49825	0.159662	0.00180447	0.0343212	#N/A	#N/A	#N/A	#N/A
		ENSG00000131378	RFTN1	-0.688107	0.220441	0.00179932	0.0343212	#N/A	#N/A	#N/A	#N/A
		ENSG00000136231	IGF2BP3	-1.52175	0.487749	0.00180882	0.0343212	#N/A	#N/A	#N/A	#N/A
		ENSG00000138378	STAT4	-0.792014	0.253876	0.0018104	0.0343212	#N/A	#N/A	#N/A	#N/A
		ENSG00000156587	UBE2L6	-0.947191	0.303483	0.00180196	0.0343212	#N/A	#N/A	#N/A	#N/A
		ENSG00000185862	EVI2B	-0.952832	0.305294	0.00180223	0.0343212	#N/A	#N/A	#N/A	#N/A
		ENSG00000188242	PP7080	-0.716664	0.229622	0.00180203	0.0343212	#N/A	#N/A	#N/A	#N/A
		ENSG00000275896	PRSS2	-2.09468	0.671433	0.00181021	0.0343212	#N/A	#N/A	#N/A	#N/A
		ENSG00000184988	TMEM106A	-0.539448	0.172956	0.00181478	0.0343719	#N/A	#N/A	#N/A	#N/A
		ENSG00000124549	BTN2A3P	-0.556043	0.178302	0.00181748	0.0343909	#N/A	#N/A	#N/A	#N/A
		ENSG00000223350	IGLV9-49	-0.989534	0.317385	0.00182224	0.0344487	#N/A	#N/A	#N/A	#N/A
		ENSG00000249806	AC139720.1	-1.64025	0.526173	0.00182501	0.0344687	#N/A	#N/A	#N/A	#N/A
		ENSG00000072121	ZFYVE26	-0.350725	0.112542	0.00183079	0.0345175	#N/A	#N/A	#N/A	#N/A
		ENSG00000100298	APOBEC3H	-1.42358	0.456811	0.00183101	0.0345175	#N/A	#N/A	#N/A	#N/A
		ENSG00000124496	TRERF1	-0.741547	0.238342	0.00186282	0.0349218	#N/A	#N/A	#N/A	#N/A
		ENSG00000139890	REM2	-0.935644	0.300776	0.00186603	0.0349496	#N/A	#N/A	#N/A	#N/A
		ENSG00000134824	FADS2	-1.73125	0.556607	0.00186857	0.0349648	#N/A	#N/A	#N/A	#N/A
		ENSG00000211645	IGLV1-50	-1.66818	0.536392	0.0018709	0.0349759	#N/A	#N/A	#N/A	#N/A
		ENSG00000198502	HLA-DRB5	-0.750157	0.241271	0.00187601	0.0350391	#N/A	#N/A	#N/A	#N/A
		ENSG00000077684	JADE1	-0.426288	0.13715	0.0018824	0.035126	#N/A	#N/A	#N/A	#N/A
		ENSG00000104998	IL27RA	-0.674615	0.217089	0.00188645	0.0351366	#N/A	#N/A	#N/A	#N/A
		ENSG00000228427	AL590764.1	-1.28295	0.412827	0.00188543	0.0351366	#N/A	#N/A	#N/A	#N/A
		ENSG00000125510	OPRL1	-0.994983	0.320486	0.00190533	0.035418	#N/A	#N/A	#N/A	#N/A
		ENSG00000106415	GLCCI1	-0.983425	0.316887	0.00191315	0.0354705	#N/A	#N/A	#N/A	#N/A
		ENSG00000049768	FOXP3	-1.23386	0.397901	0.00192914	0.0357336	#N/A	#N/A	#N/A	#N/A
		ENSG00000100385	IL2RB	-0.822818	0.265368	0.00193087	0.0357336	#N/A	#N/A	#N/A	#N/A
		ENSG00000136872	ALDOB	-1.95352	0.630222	0.00193694	0.0358131	#N/A	#N/A	#N/A	#N/A
		ENSG00000255587	RAB44	-0.778028	0.251104	0.00194547	0.0359378	#N/A	#N/A	#N/A	#N/A
		ENSG00000140937	CDH11	-0.644293	0.207988	0.00195005	0.0359652	#N/A	#N/A	#N/A	#N/A
		ENSG00000067066	SP100	-0.478573	0.154532	0.00195538	0.0359894	#N/A	#N/A	#N/A	#N/A
		ENSG00000096968	JAK2	-0.695879	0.224696	0.00195501	0.0359894	#N/A	#N/A	#N/A	#N/A
		ENSG00000129451	KLK10	-2.22021	0.717323	0.00196721	0.036101	#N/A	#N/A	#N/A	#N/A
		ENSG00000134470	IL15RA	-0.613255	0.198105	0.00196411	0.036101	#N/A	#N/A	#N/A	#N/A
		ENSG00000166446	CDYL2	-0.804138	0.259824	0.00196859	0.036101	#N/A	#N/A	#N/A	#N/A
		ENSG00000111199	TRPV4	-0.937592	0.303012	0.00197321	0.0361528	#N/A	#N/A	#N/A	#N/A
		ENSG00000088386	SLC15A1	-1.18449	0.382944	0.00198065	0.0361907	#N/A	#N/A	#N/A	#N/A
		ENSG00000143119	CD53	-0.910258	0.294685	0.0020089	0.0365746	#N/A	#N/A	#N/A	#N/A
		ENSG00000128918	ALDH1A2	-2.09942	0.67976	0.0020119	0.0365767	#N/A	#N/A	#N/A	#N/A
		ENSG00000111801	BTN3A3	-0.734483	0.237939	0.00202291	0.0367305	#N/A	#N/A	#N/A	#N/A
		ENSG00000065882	TBC1D1	-0.310625	0.100728	0.00204376	0.0369818	#N/A	#N/A	#N/A	#N/A
		ENSG00000110876	SELPLG	-0.83958	0.272349	0.00205109	0.0370193	#N/A	#N/A	#N/A	#N/A
		ENSG00000244482	LILRA6	-1.141	0.370137	0.00205164	0.0370193	#N/A	#N/A	#N/A	#N/A
		ENSG00000129675	ARHGEF6	-0.720865	0.234036	0.00206902	0.0372332	#N/A	#N/A	#N/A	#N/A
		ENSG00000150977	RILPL2	-0.669377	0.217305	0.00206751	0.0372332	#N/A	#N/A	#N/A	#N/A
		ENSG00000144815	NXPE3	-0.948807	0.308312	0.00208795	0.0375069	#N/A	#N/A	#N/A	#N/A
		ENSG00000230438	SERPINB9P1	-1.0161	0.330416	0.00210358	0.037744	#N/A	#N/A	#N/A	#N/A
		ENSG00000019991	HGF	-0.854274	0.277844	0.00210747	0.0377569	#N/A	#N/A	#N/A	#N/A
		ENSG00000105374	NKG7	-0.727694	0.236799	0.00211883	0.0378598	#N/A	#N/A	#N/A	#N/A
		ENSG00000100170	SLC5A1	-0.499815	0.162693	0.00212531	0.0378751	#N/A	#N/A	#N/A	#N/A
		ENSG00000211967	IGHV3-53	-1.13739	0.370176	0.00212232	0.0378751	#N/A	#N/A	#N/A	#N/A
		ENSG00000255571	MIR9-3HG	-1.06735	0.347412	0.00212423	0.0378751	#N/A	#N/A	#N/A	#N/A
		ENSG00000135472	FAIM2	-0.92514	0.301246	0.00213313	0.0379811	#N/A	#N/A	#N/A	#N/A
		ENSG00000101986	ABCD1	-0.457744	0.149117	0.00214276	0.0379843	#N/A	#N/A	#N/A	#N/A
		ENSG00000140090	SLC24A4	-1.20729	0.393286	0.00214237	0.0379843	#N/A	#N/A	#N/A	#N/A
		ENSG00000204287	HLA-DRA	-0.900538	0.293363	0.00214271	0.0379843	#N/A	#N/A	#N/A	#N/A
		ENSG00000211598	IGKV4-1	-1.15836	0.377343	0.00214209	0.0379843	#N/A	#N/A	#N/A	#N/A
		ENSG00000196549	MME	-1.20189	0.391789	0.00215711	0.0381725	#N/A	#N/A	#N/A	#N/A
		ENSG00000113532	ST8SIA4	-0.688386	0.224417	0.00215902	0.0381729	#N/A	#N/A	#N/A	#N/A
		ENSG00000135519	KCNH3	-1.36319	0.444529	0.00216518	0.0382149	#N/A	#N/A	#N/A	#N/A
		ENSG00000211639	IGLV4-60	-1.29515	0.422625	0.00218008	0.0384109	#N/A	#N/A	#N/A	#N/A
		ENSG00000102096	PIM2	-1.10962	0.362446	0.0022025	0.0387423	#N/A	#N/A	#N/A	#N/A
		ENSG00000280832	GSEC	-1.28769	0.420615	0.00220273	0.0387423	#N/A	#N/A	#N/A	#N/A
		ENSG00000134242	PTPN22	-0.816645	0.266938	0.00221847	0.0389513	#N/A	#N/A	#N/A	#N/A
		ENSG00000225138	SLC9A3-AS1	-0.50692	0.165758	0.00222679	0.0390297	#N/A	#N/A	#N/A	#N/A
		ENSG00000042062	RIPOR3	-0.834379	0.272901	0.00223234	0.0390592	#N/A	#N/A	#N/A	#N/A
		ENSG00000181444	ZNF467	-0.71589	0.234256	0.002243	0.039144	#N/A	#N/A	#N/A	#N/A
		ENSG00000214110	LDHAP4	-0.610798	0.199936	0.00225079	0.0392461	#N/A	#N/A	#N/A	#N/A
		ENSG00000026508	CD44	-0.600361	0.196597	0.00225988	0.0393707	#N/A	#N/A	#N/A	#N/A
		ENSG00000004468	CD38	-1.47935	0.484951	0.00228451	0.0396629	#N/A	#N/A	#N/A	#N/A
		ENSG00000166278	C2	-0.840696	0.275755	0.00229827	0.0398538	#N/A	#N/A	#N/A	#N/A
		ENSG00000211699	TRGV3	-1.17725	0.386166	0.00229945	0.0398538	#N/A	#N/A	#N/A	#N/A
		ENSG00000125730	C3	-1.45259	0.47672	0.00231097	0.0399508	#N/A	#N/A	#N/A	#N/A
		ENSG00000112541	PDE10A	-0.778797	0.255635	0.00231512	0.0399883	#N/A	#N/A	#N/A	#N/A
		ENSG00000065833	ME1	-0.717733	0.235741	0.00233	0.0402109	#N/A	#N/A	#N/A	#N/A
		ENSG00000086205	FOLH1	-1.278	0.41985	0.0023351	0.0402645	#N/A	#N/A	#N/A	#N/A
		ENSG00000172081	MOB3A	-0.370525	0.12175	0.00233978	0.0403108	#N/A	#N/A	#N/A	#N/A
		ENSG00000133985	TTC9	-1.02988	0.338612	0.00235418	0.0404899	#N/A	#N/A	#N/A	#N/A
		ENSG00000153317	ASAP1	-0.598895	0.197072	0.00237391	0.0406841	#N/A	#N/A	#N/A	#N/A
		ENSG00000230006	ANKRD36BP2	-0.92519	0.304588	0.00238539	0.040772	#N/A	#N/A	#N/A	#N/A
		ENSG00000261371	PECAM1	-0.66462	0.218816	0.00238672	0.040772	#N/A	#N/A	#N/A	#N/A
		ENSG00000106852	LHX6	-0.571968	0.188426	0.0024014	0.0409535	#N/A	#N/A	#N/A	#N/A
		ENSG00000064687	ABCA7	-0.543935	0.179291	0.00241492	0.0411404	#N/A	#N/A	#N/A	#N/A
		ENSG00000164342	TLR3	-0.719614	0.237222	0.00241732	0.0411404	#N/A	#N/A	#N/A	#N/A
		ENSG00000154928	EPHB1	-1.58236	0.522312	0.00244944	0.0414945	#N/A	#N/A	#N/A	#N/A
		ENSG00000113088	GZMK	-0.966333	0.319207	0.00246755	0.0416946	#N/A	#N/A	#N/A	#N/A
		ENSG00000088340	FER1L4	-1.1223	0.37088	0.00247784	0.0417985	#N/A	#N/A	#N/A	#N/A
		ENSG00000198624	CCDC69	-0.751139	0.248206	0.00247584	0.0417985	#N/A	#N/A	#N/A	#N/A
		ENSG00000211728	TRBV5-6	-1.71213	0.565878	0.00248128	0.0418217	#N/A	#N/A	#N/A	#N/A
		ENSG00000107485	GATA3	-0.802454	0.265424	0.00250042	0.0421091	#N/A	#N/A	#N/A	#N/A
		ENSG00000122679	RAMP3	-0.678869	0.224722	0.00252008	0.0424048	#N/A	#N/A	#N/A	#N/A
		ENSG00000180061	TMEM150B	-0.598676	0.198208	0.00252405	0.0424364	#N/A	#N/A	#N/A	#N/A
		ENSG00000231925	TAPBP	-0.45262	0.149904	0.0025328	0.0425482	#N/A	#N/A	#N/A	#N/A
		ENSG00000133246	PRAM1	-1.15813	0.383633	0.00253744	0.0425552	#N/A	#N/A	#N/A	#N/A
		ENSG00000241860	AL627309.5	-0.93408	0.309484	0.00254294	0.0426121	#N/A	#N/A	#N/A	#N/A
		ENSG00000081052	COL4A4	-0.907942	0.300866	0.00254646	0.0426358	#N/A	#N/A	#N/A	#N/A
		ENSG00000169884	WNT10B	-0.782764	0.259413	0.00254917	0.0426416	#N/A	#N/A	#N/A	#N/A
		ENSG00000214402	LCNL1	-1.56641	0.519158	0.00255103	0.0426416	#N/A	#N/A	#N/A	#N/A
		ENSG00000114013	CD86	-0.84877	0.281384	0.00255791	0.0426509	#N/A	#N/A	#N/A	#N/A
		ENSG00000166546	BEAN1	-2.20367	0.73055	0.00255747	0.0426509	#N/A	#N/A	#N/A	#N/A
		ENSG00000239571	IGKV2D-30	-1.48301	0.491623	0.00255655	0.0426509	#N/A	#N/A	#N/A	#N/A
		ENSG00000163823	CCR1	-0.800449	0.265401	0.00256138	0.0426734	#N/A	#N/A	#N/A	#N/A
		ENSG00000105835	NAMPT	-0.815872	0.270616	0.00257088	0.0427964	#N/A	#N/A	#N/A	#N/A
		ENSG00000204282	TNRC6C-AS1	-0.439601	0.145833	0.00257483	0.042827	#N/A	#N/A	#N/A	#N/A
		ENSG00000282939	AC245088.2	-1.19736	0.397318	0.00258163	0.0429047	#N/A	#N/A	#N/A	#N/A
		ENSG00000211896	IGHG1	-1.48855	0.494502	0.00261071	0.0433523	#N/A	#N/A	#N/A	#N/A
		ENSG00000215244	AL137145.2	-1.67804	0.557684	0.00262163	0.0434266	#N/A	#N/A	#N/A	#N/A
		ENSG00000136960	ENPP2	-0.726262	0.241426	0.00262779	0.0434931	#N/A	#N/A	#N/A	#N/A
		ENSG00000143320	CRABP2	-1.19475	0.398018	0.00268438	0.0441764	#N/A	#N/A	#N/A	#N/A
		ENSG00000168062	BATF2	-0.815121	0.271601	0.00268939	0.0442229	#N/A	#N/A	#N/A	#N/A
		ENSG00000135636	DYSF	-0.767538	0.255808	0.00269589	0.0442937	#N/A	#N/A	#N/A	#N/A
		ENSG00000189152	GRAPL	-1.63963	0.546801	0.00271239	0.0444924	#N/A	#N/A	#N/A	#N/A
		ENSG00000235531	MSC-AS1	-0.625545	0.20866	0.00271831	0.0445173	#N/A	#N/A	#N/A	#N/A
		ENSG00000154133	ROBO4	-0.528226	0.176226	0.00272256	0.044522	#N/A	#N/A	#N/A	#N/A
		ENSG00000159871	LYPD5	-1.64776	0.549732	0.00272301	0.044522	#N/A	#N/A	#N/A	#N/A
		ENSG00000101224	CDC25B	-0.808182	0.269714	0.00273154	0.0446255	#N/A	#N/A	#N/A	#N/A
		ENSG00000091129	NRCAM	-1.07405	0.358603	0.00274364	0.0447508	#N/A	#N/A	#N/A	#N/A
		ENSG00000139055	ERP27	-0.966927	0.322921	0.0027506	0.0447783	#N/A	#N/A	#N/A	#N/A
		ENSG00000205060	SLC35B4	-0.422025	0.140949	0.00275197	0.0447783	#N/A	#N/A	#N/A	#N/A
		ENSG00000131370	SH3BP5	-0.544153	0.181797	0.0027607	0.0447803	#N/A	#N/A	#N/A	#N/A
		ENSG00000166128	RAB8B	-0.718855	0.240165	0.00276096	0.0447803	#N/A	#N/A	#N/A	#N/A
		ENSG00000167772	ANGPTL4	-1.80377	0.602515	0.00275594	0.0447803	#N/A	#N/A	#N/A	#N/A
		ENSG00000025708	TYMP	-0.919149	0.307221	0.00277321	0.044871	#N/A	#N/A	#N/A	#N/A
		ENSG00000167634	NLRP7	-1.39197	0.465336	0.00277775	0.0448726	#N/A	#N/A	#N/A	#N/A
		ENSG00000276980	AC008760.2	-2.42151	0.809458	0.00277593	0.0448726	#N/A	#N/A	#N/A	#N/A
		ENSG00000133794	ARNTL	-0.443984	0.148439	0.00278056	0.0448821	#N/A	#N/A	#N/A	#N/A
		ENSG00000073150	PANX2	-1.66201	0.555719	0.00278308	0.0448868	#N/A	#N/A	#N/A	#N/A
		ENSG00000090382	LYZ	-0.827915	0.276939	0.00279418	0.044994	#N/A	#N/A	#N/A	#N/A
		ENSG00000197977	ELOVL2	-2.17572	0.727725	0.00279196	0.044994	#N/A	#N/A	#N/A	#N/A
		ENSG00000173110	HSPA6	-0.65147	0.217965	0.00280012	0.045019	#N/A	#N/A	#N/A	#N/A
		ENSG00000139178	C1RL	-0.40205	0.13457	0.00281108	0.0450866	#N/A	#N/A	#N/A	#N/A
		ENSG00000173894	CBX2	-0.804302	0.269168	0.00280712	0.0450866	#N/A	#N/A	#N/A	#N/A
		ENSG00000204983	PRSS1	-2.50261	0.837952	0.00282112	0.0452117	#N/A	#N/A	#N/A	#N/A
		ENSG00000148346	LCN2	-1.51231	0.506692	0.00283888	0.0454279	#N/A	#N/A	#N/A	#N/A
		ENSG00000162746	FCRLB	-1.26963	0.425429	0.00284184	0.0454358	#N/A	#N/A	#N/A	#N/A
		ENSG00000015568	RGPD5	-1.71846	0.57588	0.00284452	0.0454427	#N/A	#N/A	#N/A	#N/A
		ENSG00000132704	FCRL2	-0.912336	0.30586	0.00285571	0.0455853	#N/A	#N/A	#N/A	#N/A
		ENSG00000188906	LRRK2	-1.17251	0.393497	0.00288504	0.0459085	#N/A	#N/A	#N/A	#N/A
		ENSG00000204161	C10orf128	-0.607632	0.20402	0.00289854	0.0460147	#N/A	#N/A	#N/A	#N/A
		ENSG00000101825	MXRA5	-0.751892	0.252489	0.00290213	0.0460355	#N/A	#N/A	#N/A	#N/A
		ENSG00000160999	SH2B2	-0.715636	0.240335	0.00290461	0.0460387	#N/A	#N/A	#N/A	#N/A
		ENSG00000164308	ERAP2	-0.781151	0.262367	0.00290783	0.0460536	#N/A	#N/A	#N/A	#N/A
		ENSG00000163519	TRAT1	-1.06769	0.359254	0.00295902	0.0467544	#N/A	#N/A	#N/A	#N/A
		ENSG00000012223	LTF	-1.59225	0.536088	0.00297687	0.0469629	#N/A	#N/A	#N/A	#N/A
		ENSG00000175318	GRAMD2	-1.15565	0.389091	0.00297683	0.0469629	#N/A	#N/A	#N/A	#N/A
		ENSG00000099958	DERL3	-0.955042	0.321656	0.00298632	0.0470753	#N/A	#N/A	#N/A	#N/A
		ENSG00000106366	SERPINE1	-1.77186	0.597471	0.00302103	0.0473371	#N/A	#N/A	#N/A	#N/A
		ENSG00000110395	CBL	-0.478769	0.161414	0.00301604	0.0473371	#N/A	#N/A	#N/A	#N/A
		ENSG00000211933	IGHV6-1	-1.428	0.481472	0.00301797	0.0473371	#N/A	#N/A	#N/A	#N/A
		ENSG00000066739	ATG2B	-0.390187	0.131587	0.00302445	0.0473441	#N/A	#N/A	#N/A	#N/A
		ENSG00000235505	AP002004.1	-0.761421	0.256813	0.00302792	0.0473616	#N/A	#N/A	#N/A	#N/A
		ENSG00000253276	CCDC71L	-0.619284	0.209022	0.00304878	0.0476511	#N/A	#N/A	#N/A	#N/A
		ENSG00000174804	FZD4	-0.413778	0.139671	0.00305132	0.0476538	#N/A	#N/A	#N/A	#N/A
		ENSG00000115525	ST3GAL5	-0.704255	0.237744	0.0030541	0.0476604	#N/A	#N/A	#N/A	#N/A
		ENSG00000131459	GFPT2	-0.971742	0.328112	0.00306027	0.0477198	#N/A	#N/A	#N/A	#N/A
		ENSG00000162849	KIF26B	-1.22594	0.414044	0.00306748	0.0477955	#N/A	#N/A	#N/A	#N/A
		ENSG00000115232	ITGA4	-0.791842	0.267591	0.00308492	0.0479841	#N/A	#N/A	#N/A	#N/A
		ENSG00000211956	IGHV4-34	-1.61197	0.544819	0.00308908	0.0479841	#N/A	#N/A	#N/A	#N/A
		ENSG00000283597	FAM169B	-2.95352	0.998227	0.00308875	0.0479841	#N/A	#N/A	#N/A	#N/A
		ENSG00000146021	KLHL3	-0.645839	0.218329	0.00309549	0.0480097	#N/A	#N/A	#N/A	#N/A
		ENSG00000131142	CCL25	-2.40391	0.813159	0.0031139	0.0481777	#N/A	#N/A	#N/A	#N/A
		ENSG00000131401	NAPSB	-0.944189	0.319407	0.00311585	0.0481777	#N/A	#N/A	#N/A	#N/A
		ENSG00000089692	LAG3	-0.823497	0.278678	0.00312653	0.0481982	#N/A	#N/A	#N/A	#N/A
		ENSG00000110436	SLC1A2	-1.28406	0.434535	0.00312646	0.0481982	#N/A	#N/A	#N/A	#N/A
		ENSG00000268758	ADGRE4P	-0.808492	0.273572	0.00312343	0.0481982	#N/A	#N/A	#N/A	#N/A
		ENSG00000231105	AL031728.1	-1.47071	0.49777	0.00313085	0.0482251	#N/A	#N/A	#N/A	#N/A
		ENSG00000014257	ACPP	-0.72996	0.247108	0.00313671	0.0482419	#N/A	#N/A	#N/A	#N/A
		ENSG00000135604	STX11	-1.12737	0.381748	0.00314523	0.048336	#N/A	#N/A	#N/A	#N/A
		ENSG00000111679	PTPN6	-0.473677	0.160446	0.00315467	0.0483906	#N/A	#N/A	#N/A	#N/A
		ENSG00000114353	GNAI2	-0.48271	0.163507	0.0031549	0.0483906	#N/A	#N/A	#N/A	#N/A
		ENSG00000277481	PKD1L3	-1.43091	0.484705	0.00315596	0.0483906	#N/A	#N/A	#N/A	#N/A
		ENSG00000211625	IGKV3D-20	-1.71159	0.579853	0.00315959	0.0484095	#N/A	#N/A	#N/A	#N/A
		ENSG00000027075	PRKCH	-0.525681	0.17815	0.00316981	0.0484926	#N/A	#N/A	#N/A	#N/A
		ENSG00000175928	LRRN1	-0.817511	0.277042	0.00316899	0.0484926	#N/A	#N/A	#N/A	#N/A
		ENSG00000241839	PLEKHO2	-0.767619	0.260176	0.00317376	0.0485163	#N/A	#N/A	#N/A	#N/A
		ENSG00000064012	CASP8	-0.403723	0.13696	0.00320106	0.0488966	#N/A	#N/A	#N/A	#N/A
		ENSG00000172932	ANKRD13D	-0.497393	0.16875	0.00320351	0.0488971	#N/A	#N/A	#N/A	#N/A
		ENSG00000163644	PPM1K	-0.684823	0.232394	0.00321054	0.0489674	#N/A	#N/A	#N/A	#N/A
		ENSG00000176160	HSF5	-2.21896	0.753211	0.00321914	0.0490616	#N/A	#N/A	#N/A	#N/A
		ENSG00000177464	GPR4	-0.943975	0.320488	0.0032251	0.0491153	#N/A	#N/A	#N/A	#N/A
		ENSG00000129048	ACKR4	-2.09392	0.711526	0.00325199	0.0494192	#N/A	#N/A	#N/A	#N/A
		ENSG00000149970	CNKSR2	-1.27411	0.432954	0.00325239	0.0494192	#N/A	#N/A	#N/A	#N/A
		ENSG00000270426	AC099343.2	-1.1682	0.397177	0.00326877	0.0495651	#N/A	#N/A	#N/A	#N/A
		ENSG00000116793	PHTF1	-0.568409	0.193333	0.00328156	0.0496063	#N/A	#N/A	#N/A	#N/A
		ENSG00000154783	FGD5	-0.403125	0.137113	0.00328111	0.0496063	#N/A	#N/A	#N/A	#N/A
		ENSG00000175040	CHST2	-0.869778	0.295841	0.00328188	0.0496063	#N/A	#N/A	#N/A	#N/A
		ENSG00000186407	CD300E	-2.04307	0.694836	0.00327832	0.0496063	#N/A	#N/A	#N/A	#N/A
		ENSG00000187688	TRPV2	-0.708961	0.241379	0.00331269	0.0499599	#N/A	#N/A	#N/A	#N/A
